# Supplementary material
Source: PubMed Central journal article supplement (PMC3839734)
Supplement: 1310479110_sapp.pdf [file 1310479110_sapp.pdf]

## Supporting Information

### SI Materials and Methods

**Mice and Treatments.** C57BL/6J mice and *ROSA26-Cre<sup>ERT2</sup>* mice were purchased from the Jackson Laboratory, and *Alk1<sup>floxex/floxex</sup>* mice (1) were transferred to KAIST. To knock down *Alk1* in a tamoxifen-dependent manner, *Alk1<sup>2fl/2fl</sup>* mice were intercrossed with *ROSA26-Cre<sup>ERT2</sup>* mice. Tamoxifen (0.2 mg; Sigma-Aldrich) dissolved in corn oil (Sigma-Aldrich) was injected into the peritoneal cavity of mouse pups on postnatal day 4 (P4) and P6. All animals were bred in a specific pathogen-free animal facility, and were fed a standard diet (PMI Lab Diet) *ad libitum* with free access to water. *Bmp9* KO mice were generated as previously reported (2). All experimental protocols were performed in accordance with the policies of the Animal Ethics Committee of the University of Tokyo and KAIST.

**Model of Chronic Aseptic Peritonitis.** We used 5-week-old Balb/c mice obtained from Sankyo Laboratories. The model of chronic aseptic peritonitis has been described previously (3-5). To induce peritonitis, we intraperitoneally administered 2 ml of 3% thioglycollate medium (BBL thioglycollate medium, BD Biosciences) to Balb/c mice every 2 days for 2 weeks. The adenovirus encoding *lacZ* or *BMP9* was also intraperitoneally administered twice per week during the same period. Mice were then sacrificed, and their diaphragms were excised and prepared for immunostaining as described previously (3). Fluorescent signals were visualized, and digital images were obtained using a Zeiss LSM 510 confocal microscope equipped with argon and helium-neon lasers (Carl Zeiss). LYVE-1-positive lymphatic vessels were observed using a 20× objective lens and analyzed using LSM Image Browser (Carl Zeiss) and ImageJ software.

**Balb/c Nude Mouse Model of Mouse Breast Cancer.** Balb/c nude male mice aged 5-6 weeks were obtained from CLEA Japan and the Sankyo Laboratory. A total of  $4 \times 10^6$  4T1 tumor cells in 100  $\mu$ l PBS were injected subcutaneously into the left flank of each mouse ( $n \geq 5$  mice per group) and allowed to grow for 5 weeks, when the major axis of each tumor was approximately 10 mm.

**Gene Expression Profiling Analysis.** HDLECs were serum starved for 6 h and treated with or without BMP-9 (2 ng/ml) for 4 or 24 h, or were transfected with siRNAs for 48 h. Gene expression profiling was performed using a GeneChip® Human Gene 1.0 ST Array (Affymetrix). Enrichment of GO terms for genes with a greater than 2-fold expression change relative to the sham treatment were determined using the Database for Annotation, Visualization, and Integrated Discovery (DAVID; <http://david.abcc.ncifcrf.gov>) (6). Enriched GO terms were further integrated into similar annotation categories by functional annotation clustering in DAVID. For gene set enrichment analysis (GSEA), log-transformed data were analyzed with GSEA software (<http://www.broadinstitute.org/gsea/>) (7) using the LEC- or BEC-specific gene signatures reported previously (8). Parameters were set by default settings, except that the Metric for ranking genes and the Permutation type were changed to Diff\_of\_Classes and gene\_set, respectively.

**Cell Culture.** HDLECs and HMVEC-LLy were originated from adult dermal and lung tissues, respectively, and prepared by FACS sorting for CD31/podoplanin (>95% according to Lonza datasheet). These cells were maintained from passage 3 to passage 10 in endothelial basal medium (EBM-2MV) containing 5% (vol/vol) fetal bovine serum (FBS), supplemented with endothelial cell growth supplement, and were harvested for the analyses when the control cells were sub-confluent. Expression of markers for lymphatic endothelial cells in HDLECs and HMVEC-LLy was confirmed by quantitative RT-PCR analysis (Fig. S15). HDBEC and HUVEC were maintained from passage 3 to passage 10 in EBM-2MV and EBM-2 containing 5% (vol/vol) FBS and 2% (vol/vol), respectively, supplemented with endothelial cell growth supplement. Pulmonary artery smooth muscle cells (PASMC) were maintained from passage 3 to passage 10 in smooth muscle growth media (SmGM-2) containing 5% (vol/vol) FBS, supplemented with smooth muscle cell growth supplement. 293FT cells were maintained in Dulbecco's modified Eagle's medium (DMEM; Invitrogen) containing 10% (vol/vol) FBS, 100 units/ml penicillin, and 100 µg/ml streptomycin. BMP-9 (1-2 ng/ml), control-Fc (100 ng/ml), and ALK-1-Fc (100 ng/ml) were purchased from R&D Systems. The 4T1 cells were grown in DMEM supplemented with 10% (vol/vol) FBS. The growth rate of HDLEC and HMVEC-LLy was measured using a Coulter Counter (Beckman Coulter) or by measuring OD<sub>450</sub> using SF cell count reagent (WST-8;

NacalaiTesque).

**Histological and Morphometric Analysis.** On P8, the mice were anesthetized by intramuscular injection of ketamine (80 mg/kg) and xylazine (12 mg/kg). The indicated tissues were collected without any cardiac perfusion and fixed with 1% (weight/vol) paraformaldehyde (PFA) in PBS. Whole-mounted tissues were blocked with 5% (vol/vol) goat serum (Jackson ImmunoResearch Laboratories) in 0.3% (vol/vol) Triton X-100 in PBS (PBST) and incubated for 6 h at room temperature (RT) with the following primary antibodies: for blood vessels, hamster anti-PECAM-1 antibody (clone 2H8, Millipore); for lymphatic vessels, rabbit anti-lymphatic vessel endothelial hyaluronan receptor (LYVE)-1 polyclonal antibody (AngioBio). After several washes in PBST, the samples were incubated with the following secondary antibodies for immunofluorescent staining: Cy3-conjugated anti-hamster IgG, and FITC-conjugated anti-rabbit IgG (both from Jackson ImmunoResearch). For 3,3'-diaminobenzidine (DAB) immunostaining, samples were incubated with horseradish peroxidase-conjugated anti-rabbit IgG antibody (sc-2030, Santa Cruz) and developed using the DAB substrate kit (Vector Laboratories) according to the manufacturer's instructions. DAB and fluorescent signals were visualized, and digital images were obtained using a Zeiss stereo microscope, or a Zeiss LSM 510 confocal microscope equipped with argon and helium-neon lasers (Carl Zeiss). Morphometric analyses of the lymphatic vessels were performed using ImageJ software (<http://rsb.info.nih.gov/ij>) or LSM Image Browser (Carl Zeiss). Area densities (percentage of total tissue area) of LYVE-1-positive lymphatic vessels were made at five regions in the cornea and intestine (each region was 1.5 mm<sup>2</sup> in area), and at three regions of the pleural side of the diaphragm (each region was 35 mm<sup>2</sup> in area). Vessel diameters were averaged among 10 consecutive LYVE-1-positive lymphatic vessels. Lymphatic filopodia visible at a screen magnification of 1000× were counted in five regions per cornea, each measuring 0.008 mm<sup>2</sup> in area.

**RNA Interference.** We purchased siRNAs for human *ALK-1* (Stealth RNAi<sup>TM</sup> Oligo IDs HSS100151 and HSS100152), human *ALK-2* (Stealth RNAi<sup>TM</sup> Oligo IDs VHS41050 and VHS41053), human *CCNE2* (Stealth RNAi<sup>TM</sup> Oligo IDs HSS113521 and HSS113522), and negative control (Stealth RNAi<sup>TM</sup> Negative Control Low GC or

Med GC) from Invitrogen. siRNAs for human *PROX1* were synthesized and purchased from QIAGEN, and the sequences of these siRNAs have been reported previously (9, 10). All siRNAs were introduced into cells using Lipofectamine RNAi Max reagent (Invitrogen) according to the manufacturer's instructions.

**RNA Isolation and RT-PCR Analysis.** Total RNAs were extracted using the RNeasy Mini Kit (QIAGEN). Reverse transcription and quantitative RT-PCR analysis was performed as previously reported (11, 12). All expression data were normalized to data for  $\beta$ -actin or GAPDH. Primer sequences are available online, as indicated in Table S7.

**TUNEL Assay.** In terminal deoxynucleotidyltransferase-mediated dUTP nick end labeling (TUNEL) assays, cells were fixed in 4% (weight/vol) PFA. After permeabilization in PBS containing 0.2% (vol/vol) Triton X-100, the *In Situ* Cell Death Detection Kit TMR red (Roche Diagnostics) was used (13). Nuclei were counterstained with TOTO-3 (Invitrogen). Fluorescence was examined using a BIO-REVO BZ-9000 20 $\times$  objective lens (Keyence). The rate of apoptosis was determined by calculating the number of TUNEL-positive dots divided by that of TOTO-3-positive nuclei in the defined field.

**Adenovirus Production.** Adenoviruses encoding *lacZ* ( $\beta$ -galactosidase), *BMP9*, and *caALK-1* were generated as reported previously (14). We measured the titer of prepared adenoviruses using the Adeno-X titer kit (TaKaRa Bio).

**Lentivirus Production and Infection.** A lentiviral expression system was used to establish *BMP9*-expressing 4T1 cells (15). cDNA encoding human *BMP9* was cloned from the liver cDNA of Multiple Tissue cDNA Panels (Clontech) using the following primers; forward: 5'- TTCCTTCAGAGCAAACAGCA -3', and reverse: 5'-GTTGTGCTCAAATCCCCATT-3'. *BMP9* cDNA was subcloned into the pENTR vector, and subsequently transferred into the pCS-EF-RfA lentiviral expression vector through the LR recombination reaction (Invitrogen). For the production of lentiviral vectors, 293FT cells (Invitrogen) were transfected using Lipofectamine 2000 (Invitrogen) with three plasmids: the vector construct, the VSV-G and Rev expressing construct (pCMV-VSV-G-RSV-Rev), and the packaging construct (pCAG-HIVgp).

Culture supernatants were collected, and viral particles were concentrated by centrifugation. For lentiviral infection,  $1 \times 10^5$  4T1 cells were infected with lentiviral vectors in suspension and plated in six-well culture plates.

**Balb/c Nude Mouse Model of Mouse Breast Cancer.** Balb/c nude male mice aged 5-6 weeks were obtained from CLEA Japan and the Sankyo Laboratory. A total of  $4 \times 10^6$  4T1 tumor cells in 100  $\mu$ l PBS were injected subcutaneously into the left flank of each mouse ( $n \geq 5$  mice per group) and allowed to grow for 5 weeks, when the major axis of each tumor was approximately 10 mm.

**Immunohistochemistry and Immunoblot Analysis.** Staining of cultured cells was performed as previously described (16-18). Excised mouse tissue samples from Balb/c mouse grafted with 4T1 cells were snap-frozen in a dry ice/acetone bath for immunohistochemistry. Frozen samples were sectioned at a thickness of 10  $\mu$ m in a cryostat and subsequently incubated with primary and secondary antibodies. Anti-LYVE-1 antibodies (Abcam) were used for immunohistochemistry. Stained specimens were examined using a BIO-REVO BZ-9000 (Keyence). All images were imported into Adobe Photoshop as JPEGs or TIFFs for figure assembly. Images were processed using ImageJ (NIH) to quantify LYVE-1-positive areas. Immunoblot analysis was performed as described (19-21). Antibodies raised against HA and  $\alpha$ -tubulin were obtained from Sigma for immunoblot analysis and immunohistochemistry. Antibodies raised against Prox1 were obtained from Merck-Millipore or R&D, and antibodies raised against phosphorylated Smad1/5 and Smad1 were obtained from Cell Signaling Technology. Bound antibody was detected using a chemiluminescent substrate (ECL; Amersham) and LAS-4000 Luminescent image analyzer (Fuji Photo Film Co., Ltd.).

**Immunocytochemistry.** HDLECs were fixed with 4% (weight/vol) PFA and treated with PBS containing 0.2% (vol/vol) Triton X-100, followed by immunostaining with an anti-MIB-1 antibody (Dako-Cytomation). MIB-1-positive fluorescent signals were visualized; digital images were obtained using a Zeiss LSM 510 confocal microscope with a 20 $\times$  objective lens and analyzed using an LSM Image Browser (Carl Zeiss).

**Immunostaining of Embryo Back Skins.** Whole murine embryos harvested at

embryonic day 15.5 were well-immersed in 4% PFA for 20-30 min, and the back skins were peeled off and incubated in 4% PFA at 4°C overnight. After washing with PBS-Triton X-100 (0.2%), samples were blocked with 1% (weight/vol) BSA, followed by immunostaining with anti-VEGFR3 antibody (R&D)(22).

**Statistical Analysis.** Values are presented as mean  $\pm$  standard deviation (SD). Significant differences between means were determined using an unpaired Student's *t*-test or analysis of variance with one-way ANOVA followed by the Student-Newman-Keuls test or GraphPad Prism 6 (GraphPad Software). Statistical significance was set at \**p* < 0.05; \*\**p* < 0.01; \*\*\**p* < 0.001.

### SI References

1. Park SO, *et al.* (2009) Real-time imaging of de novo arteriovenous malformation in a mouse model of hereditary hemorrhagic telangiectasia. *J Clin Invest* 119(11):3487-3496.
2. Ricard N, *et al.* (2012) BMP9 and BMP10 are critical for postnatal retinal vascular remodeling. *Blood* 119(25):6162-6171.
3. Iwata C, *et al.* (2007) Inhibition of cyclooxygenase-2 suppresses lymph node metastasis via reduction of lymphangiogenesis. *Cancer Res* 67(21):10181-10189.
4. Harada K, *et al.* (2009) Identification of targets of Prox1 during in vitro vascular differentiation from embryonic stem cells: functional roles of HoxD8 in lymphangiogenesis. *J Cell Sci* 122(Pt 21):3923-3930.
5. Yoshimatsu Y, *et al.* (2011) Ets family members induce lymphangiogenesis through physical and functional interaction with Prox1. *J Cell Sci* 124(Pt 16):2753-2762.
6. Huang dW, Sherman BT, & Lempicki RA (2009) Systematic and integrative analysis of large gene lists using DAVID bioinformatics resources. *Nat Protoc* 4(1):44-57.
7. Subramanian A, *et al.* (2005) Gene set enrichment analysis: a knowledge-based approach for interpreting genome-wide expression profiles. *Proc Natl Acad Sci U S A* 102(43):15545-15550.
8. Petrova TV, *et al.* (2002) Lymphatic endothelial reprogramming of vascular

- endothelial cells by the Prox-1 homeobox transcription factor. *EMBO J* 21(17):4593-4599.
9. Mishima K, *et al.* (2007) Prox1 induces lymphatic endothelial differentiation via integrin alpha 9 and other signaling cascades. *Mol Biol Cell* 18(4):1421-1429.
  10. Shimoda M, *et al.* (2006) A homeobox protein, Prox1, is involved in the differentiation, proliferation, and prognosis in hepatocellular carcinoma. *Clin Cancer Res* 12(20):6005-6011.
  11. Suzuki Y, Montagne K, Nishihara A, Watabe T, & Miyazono K (2008) BMPs promote proliferation and migration of endothelial cells via stimulation of VEGF-A/VEGFR2 and angiopoietin-1/Tie2 signalling. *J Biochem* 143(2):199-206.
  12. Nagano Y, Koinuma D, Miyazawa K, & Miyazono K (2010) Context-dependent regulation of the expression of c-Ski protein by Arkadia in human cancer cells. *J Biochem* 147(4):545-554.
  13. Hoshino Y, Katsuno Y, Ehata S, & Miyazono K (2011) Autocrine TGF- $\beta$  protects breast cancer cells from apoptosis through reduction of BH3-only protein, Bim. *J Biochem* 149(1):55-65.
  14. Shirakihara T, Saitoh M, & Miyazono K (2007) Differential regulation of epithelial and mesenchymal markers by delta EF1 proteins in epithelial-mesenchymal transition induced by TGF- $\beta$ . *Mol Biol Cell* 18(9):3533-3544.
  15. Shibuya K, *et al.* (2003) CD226 (DNAM-1) is involved in lymphocyte function-associated antigen 1 costimulatory signal for naive T cell differentiation and proliferation. *J Exp Med* 198(12):1829-1839.
  16. Watabe T, *et al.* (2003) TGF- $\beta$  receptor kinase inhibitor enhances growth and integrity of embryonic stem cell-derived endothelial cells. *J Cell Biol* 163(6):1303-1311.
  17. Kokudo T, *et al.* (2008) Snail is required for TGF- $\beta$ -induced endothelial-mesenchymal transition of embryonic stem cell-derived endothelial cells. *J Cell Sci* 121(Pt 20):3317-3324.
  18. Mihira H, *et al.* (2012) TGF- $\beta$ -induced mesenchymal transition of MS-1 endothelial cells requires Smad-dependent cooperative activation of Rho signals and MRTF-A. *J Biochem* 151(2):145-156.

19. Nagata M, *et al.* (2010) Identification of a phosphorylation site in c-Ski as serine 515. *J Biochem* 148(4):423-427.
20. Mizutani A, Saitoh M, Imamura T, Miyazawa K, & Miyazono K (2010) Arkadia complexes with clathrin adaptor AP2 and regulates EGF signalling. *J Biochem* 148(6):733-741.
21. Kawata M, *et al.* (2012) TGF- $\beta$ -induced epithelial-mesenchymal transition of A549 lung adenocarcinoma cells is enhanced by pro-inflammatory cytokines derived from RAW 264.7 macrophage cells. *J Biochem* 151(2):205-216.
22. Hirashima M, *et al.* (2008) Lymphatic vessel assembly is impaired in Aspp1-deficient mouse embryos. *Dev Biol* 316(1):149-159.



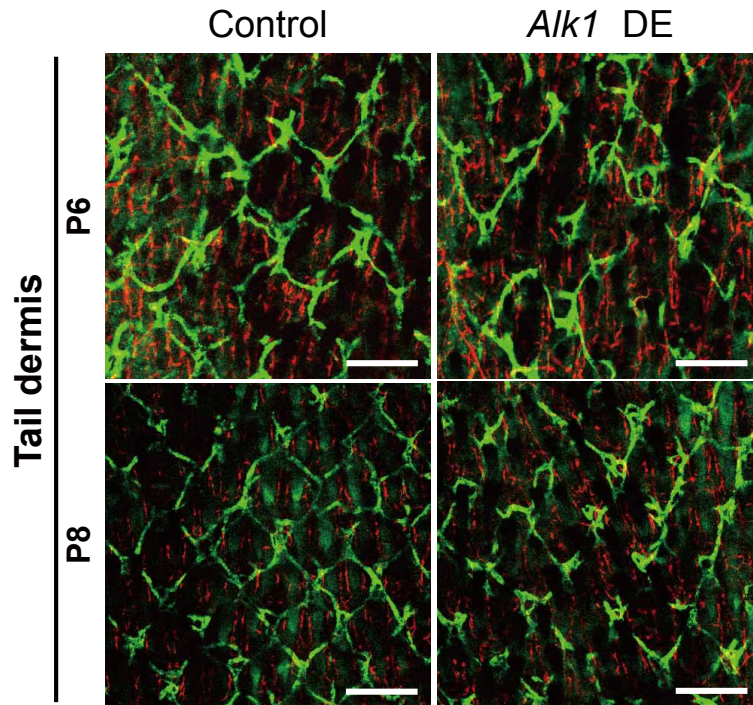

**Fig. S1. Analysis of lymphatic vessels in the tail dermis of *Alk1*-depleted mice.** Lymphatic vessels and blood vessels were visualized using anti-LYVE-1 (green) and anti-PECAM-1 (red) antibodies, respectively, at P6 and P8 in control and *Alk1*-depleted mice. Scale bars, 200  $\mu\text{m}$

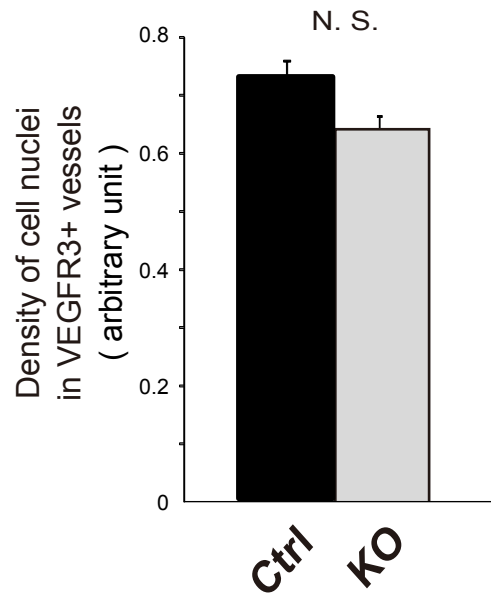

**Fig. S2. Density of cell nuclei in lymphatic vessels of *Bmp9*-deficient embryos.**

Density of cell nuclei in VEGFR3-positive vessels in *Bmp9* homozygous (KO) and heterozygous (Ctrl) embryos was shown by calculating the number of Prox1-positive nuclei divided by the number of pixels in areas of VEGFR3-positive vessels. The embryos analyzed for this graph were different from those shown in Fig. 1M and 1N.

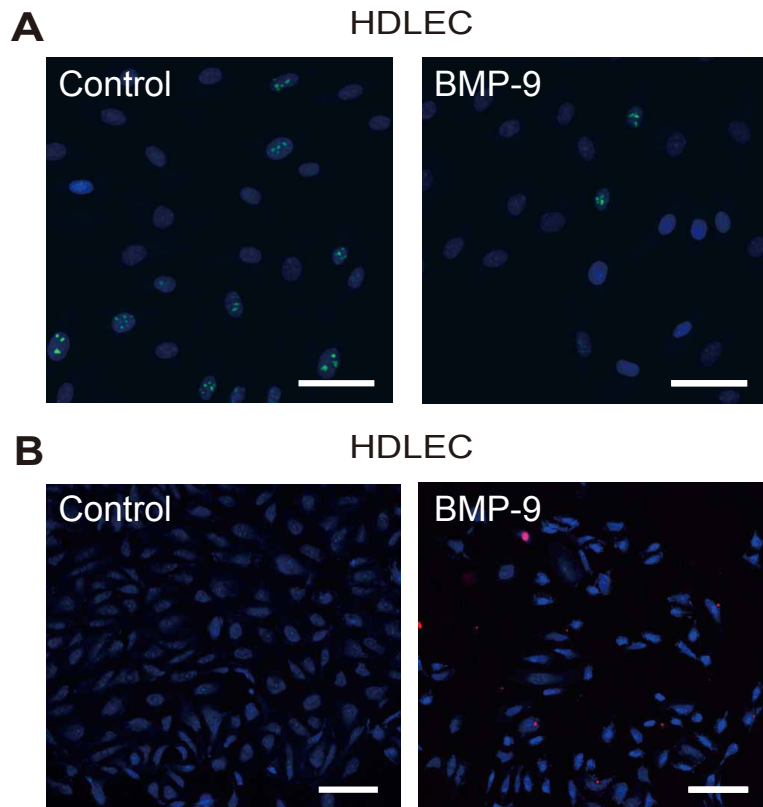

**Fig. S3. Effect of BMP-9 on the proliferation and apoptosis of HDLECs.**

(A) MIB-1+ proliferating HDLECs treated with BMP-9 versus control. Scale bars, 50  $\mu\text{m}$ .  
(B) TUNEL+ apoptotic HDLECs treated with BMP-9 versus control. Scale bars, 100  $\mu\text{m}$ .

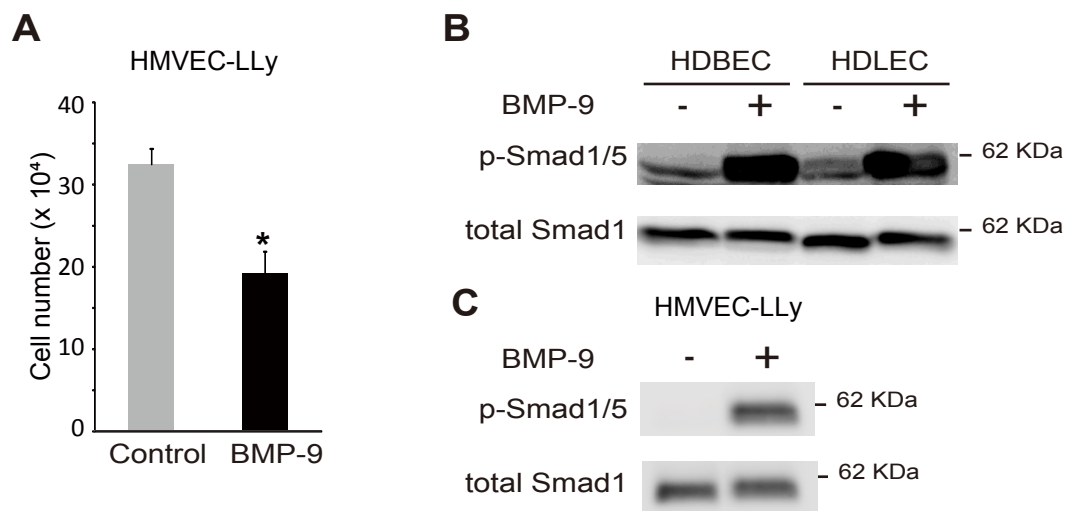

**Fig. S4. Effect of BMP-9 on other type of LECs and its downstream Smad signaling.**

(A) Effect of BMP-9 on the proliferation of HMVEC-LLy. The cells were treated with or without BMP-9 for 48 h. (B) Smad1/5 phosphorylation was detected after BMP-9 treatment for 45 minutes both in HDBECs and in HDLECs to the same extent. (C) Smad1/5 phosphorylation was also detected in HMVEC-LLy after BMP-9 treatment for 45 minutes.

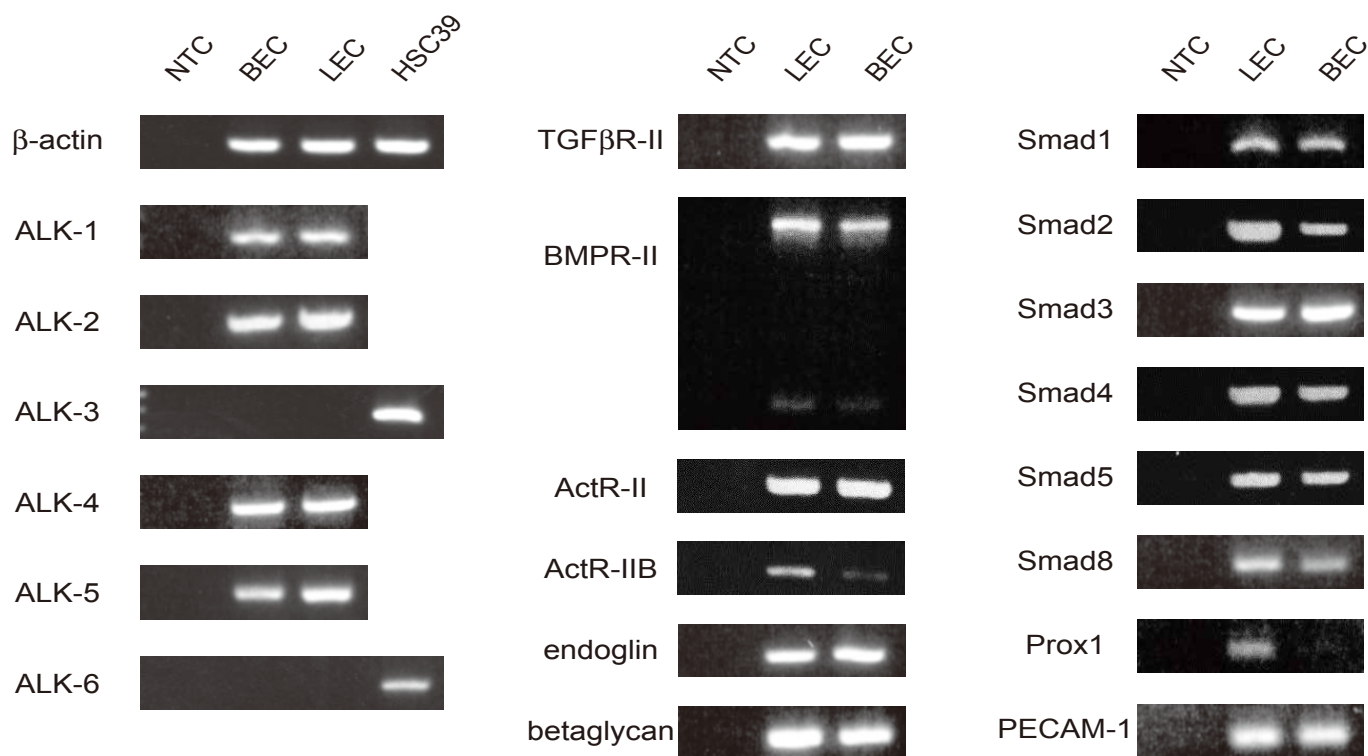

**Fig. S5. Expression of TGF- $\beta$  /BMP family signaling components in LECs and BECs.**

The amounts of the indicated mRNAs were examined using semi-quantitative RT-PCR. HDBECs and HDLECs were prepared from the same donor. Prox1 was used as a LEC marker. PECAM-1 was used as an endothelial marker.  $\beta$ -actin was used as an internal control.

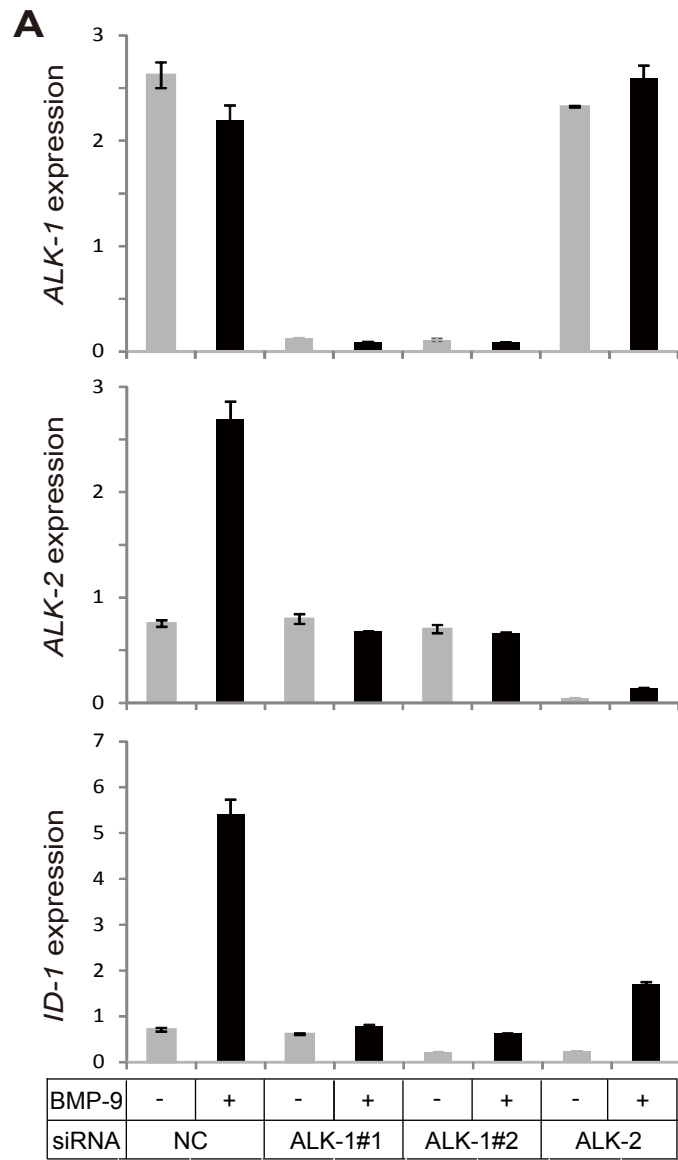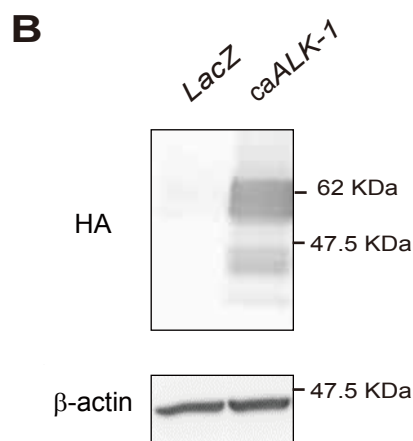

**Fig. S6. Effects of ALK-1 on expression of BMP-9 target genes**

(A) HDLECs were treated with siRNA for *ALK-1*, *ALK-2* or the control siRNA for 48 h in the presence or absence of BMP-9. Expression of *ID-1* (bottom) was decreased when the expression of *ALK-1* (top) or *ALK-2* (middle) was knocked down by siRNA specific for *ALK-1* or *ALK-2*, respectively. (B) Western blot depicting the expression of HA-tagged, constitutively active *ALK-1* (ca*ALK-1*) or control (*LacZ*) by the adenovirus in HDLECs.

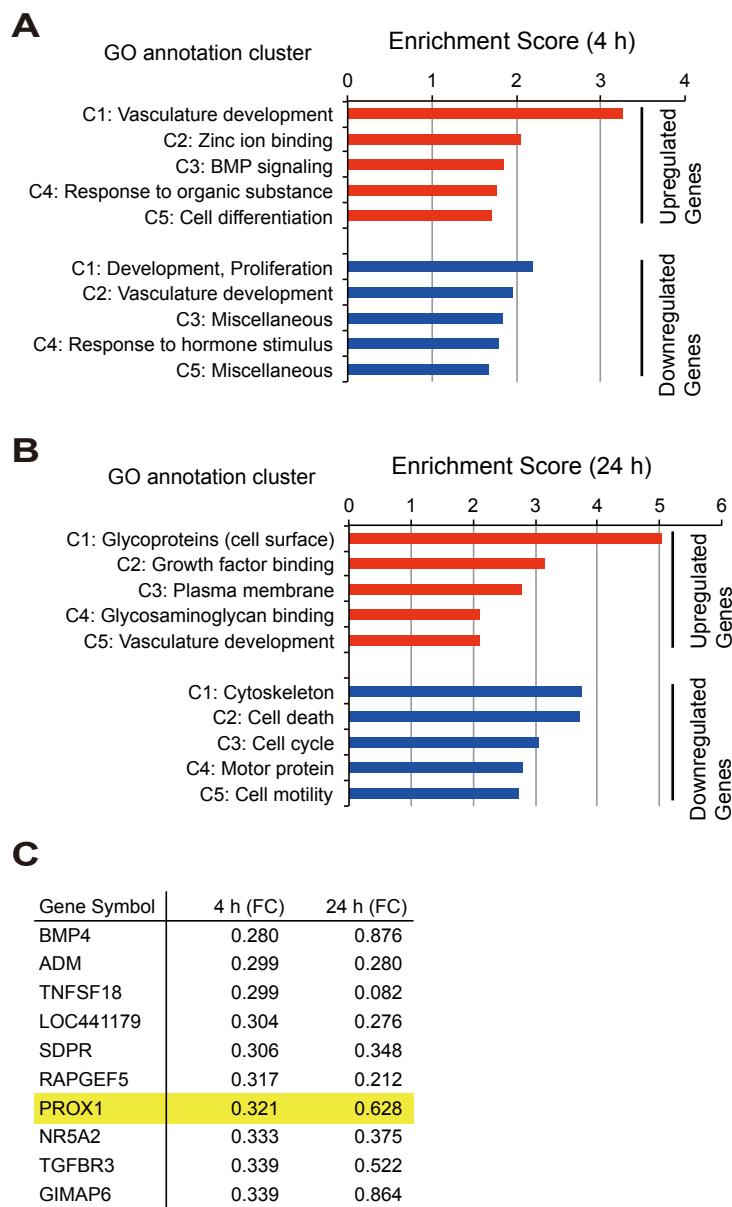

**Fig. S7. Prox1 is identified as a putative BMP-9 target gene.**

(A, B) Gene ontology analysis of gene clusters enriched for gene expression changes in HDLECs treated with BMP-9 for 4 h (A) and 24 h (B). (C) The list of the genes whose downregulated expression was significant in HDLECs treated with BMP-9 for 4 h. All values are shown as fold change (FC).

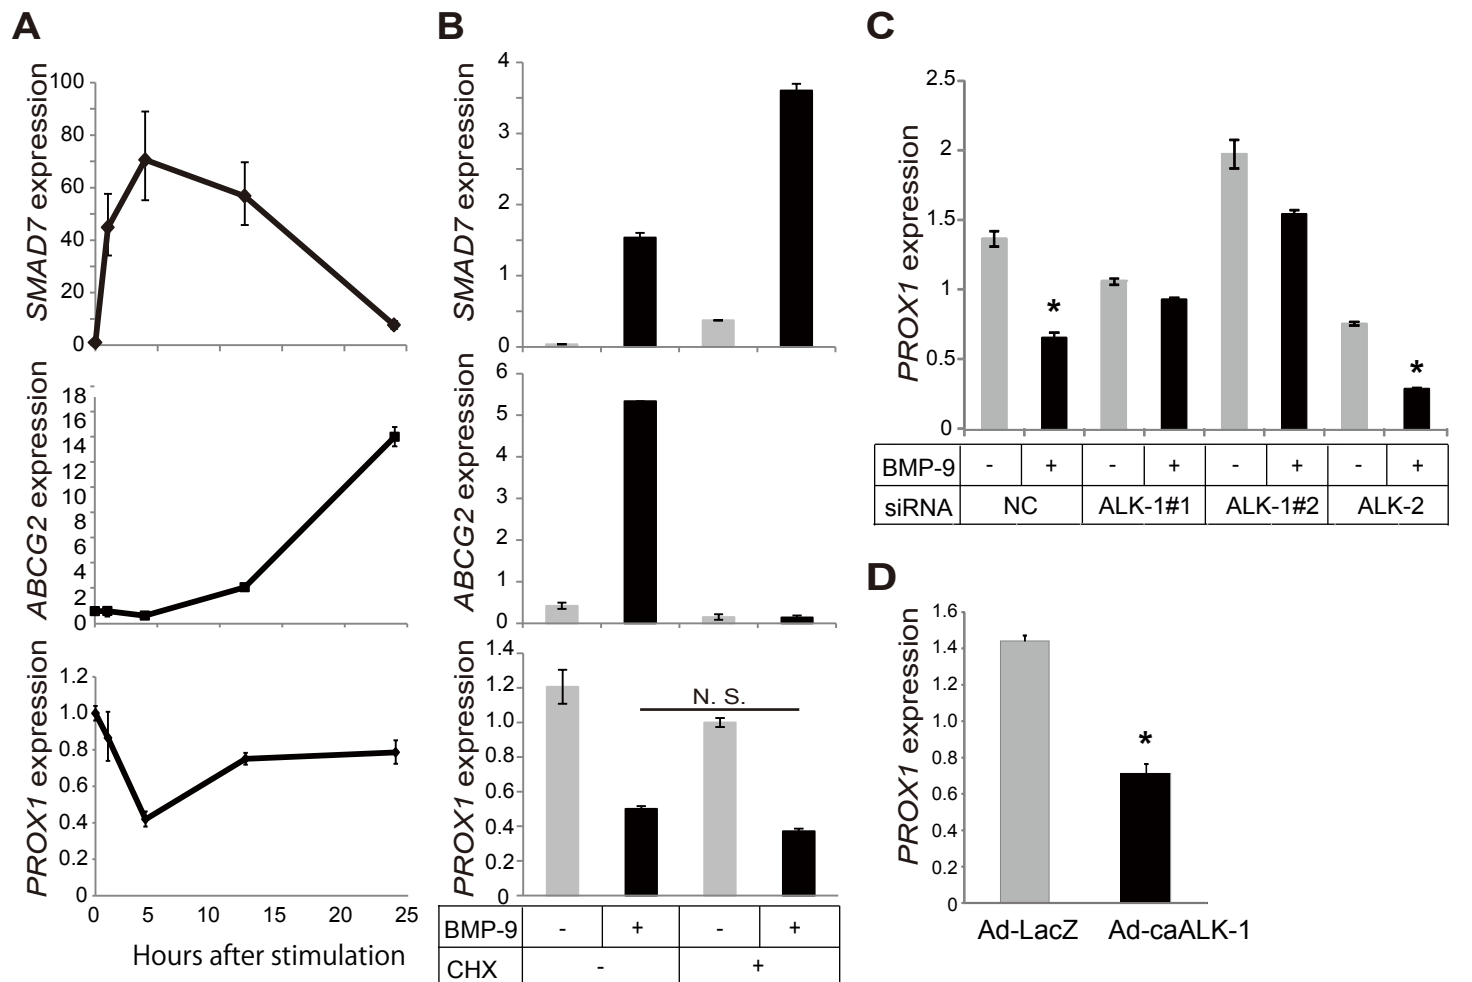

**Fig. S8. Direct regulation of Prox1 expression by BMP-9/ALK-1 signals.**

(A) Fold expression of *SMAD7* (top), *ABCG2* (middle), and *PROX1* (bottom) mRNA at the indicated times. (B) The mRNA expression of *SMAD7* (at 4 h, top), *ABCG2* (at 24 h, middle), and *PROX1* (at 4 h, bottom) in HDLECs treated with or without BMP-9 in the presence or absence of cycloheximide (CHX), an inhibitor of protein synthesis. The expression of *SMAD7*, a direct target of BMP/Smad signals, was induced within 1 hour of treatment with BMP-9. In contrast, BMP-9 induced the expression of *BCRP1/ABCG2*, a transporter protein, more than 4 hours after BMP-9 treatment, suggesting that *ABCG2* is not a direct target of BMP-9. Furthermore, BMP-9-induced expression of *SMAD7* was not inhibited by CHX. In comparison, BMP-9-induced *ABCG2* expression was completely abrogated by CHX, further confirming that *SMAD7* and *ABCG2* are direct and indirect targets of BMP-9 signals, respectively. Because the decrease in *PROX1* expression caused by BMP-9 was observed within 1 hour of treatment and was not altered by the addition of CHX, Prox1 appeared to be directly regulated by BMP-9 without *de novo* protein synthesis. (C) The expression of *PROX1* in HDLECs when treated with siRNA for *ALK1*, *ALK2* or the control siRNA for 48 hours in the presence or absence of BMP-9. When the expression of *ALK1*, but not of *ALK2*, was knocked down by specific siRNAs, BMP-9 failed to decrease *PROX1* expression. (D) The mRNA expression of *PROX1* in HDLECs when adenovirally infected with caALK-1. The expression of caALK-1 in HDLECs by the adenovirus decreased *PROX1* expression. N. S., not significant. All values are mean  $\pm$  S.D. \* $p < 0.05$ ; Student's t-test.



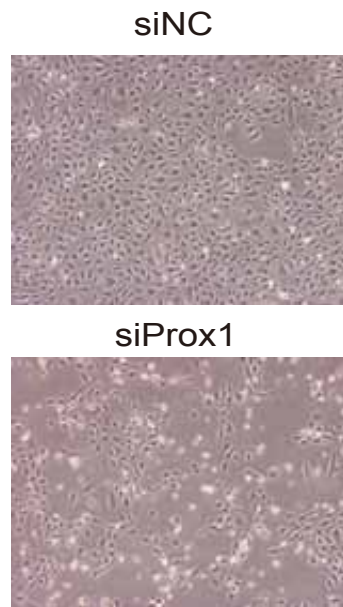

**Fig. S9.** The morphological appearance of HDLECs after sham siRNA knockdown (siNC, top) and Prox1 siRNA knockdown (siProx1, bottom).

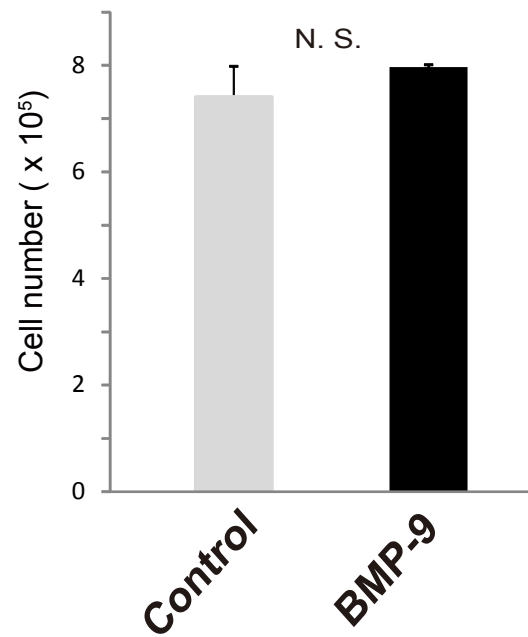

**Fig. S10. Effect of BMP-9 on the proliferation of 4T1 cells**

The cell number was counted 24 hours after 4T1 cells were treated with or without BMP-9 (50 ng/mL).

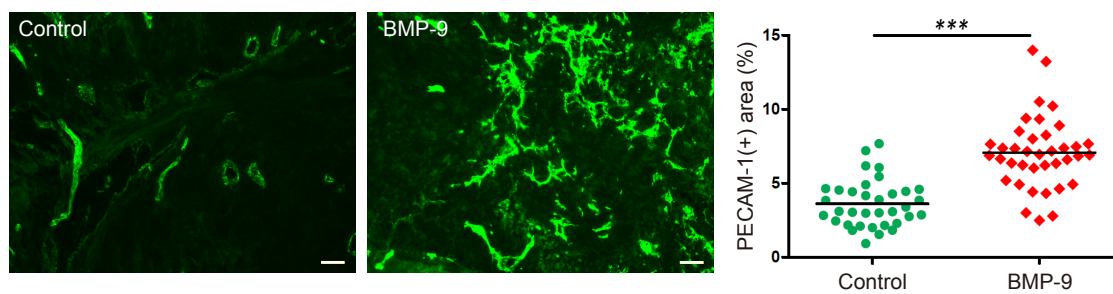

**Fig. S11. Tumor angiogenesis in 4T1 allograft tumor model**

(left) Images of the formation of blood vessels in tumors derived from allografted murine breast carcinomas expressing *GFP* (Control) or *BMP9*. (right) Quantification of the relative area of PECAM-1-positive blood vessels in these tumors. Scale bars, 100  $\mu$ m.

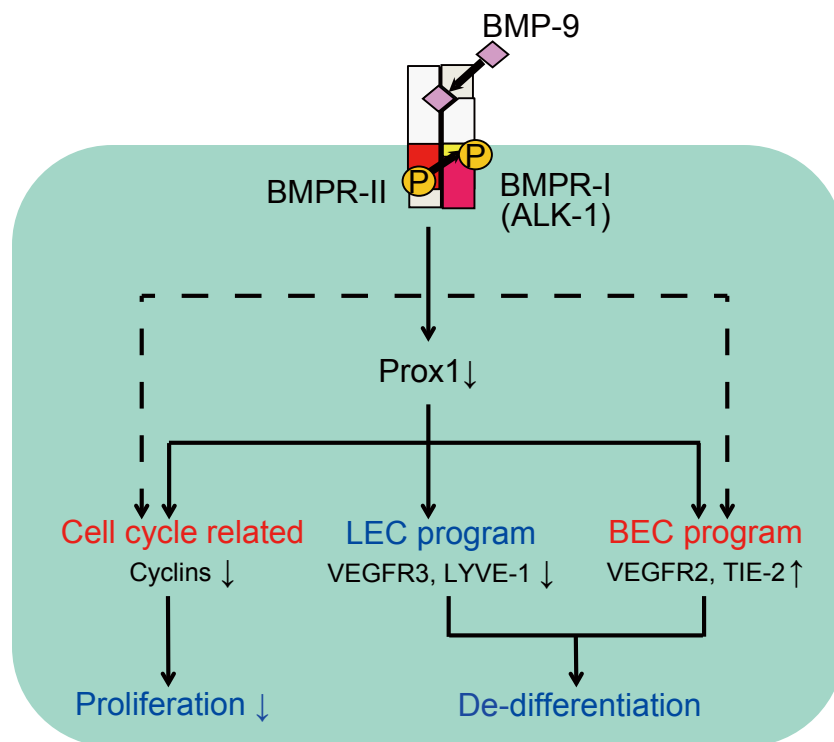

**Fig. S12. Schematic model for the roles of BMP-9/ALK-1 signals in the regulation of the proliferation of BECs and LECs.**

This model indicates roles of BMP-9/ALK-1 signals in regulating the proliferation of BECs and LECs. While BMP-9/ALK-1 signals activated the BEC program by inducing the expression of VEGFR2 and TIE-2, both of which enhance the proliferation of BECs, they also suppressed Prox1 expression, leading to the down-regulation of cell cycle-related factors including cyclin family members. Furthermore, the decrease in Prox1 expression down-regulated the expression of various LEC markers, which resulted in the de-differentiation of LEC to BEC.

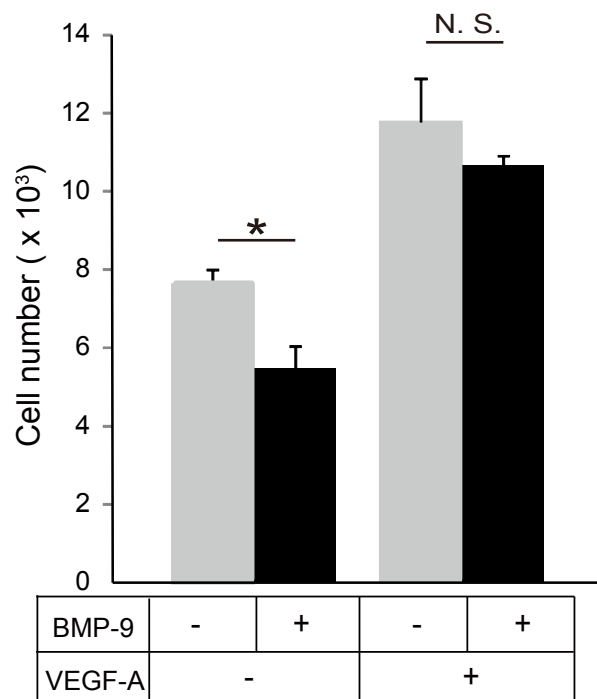

**Fig. S13. Effect of VEGF-A on the BMP-9-induced inhibition of HDLEC proliferation**

The cell number was counted 43 hours after HDLECs were treated with or without BMP-9 (1 ng/mL) in combination with VEGF-A (50 ng/mL).

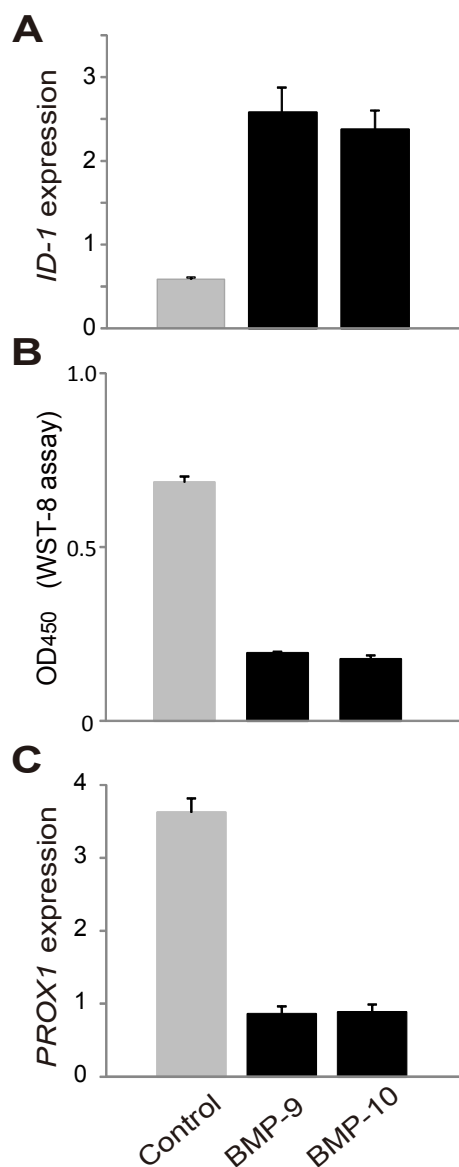

**Fig. S14. Effects of BMP-10 on HDLECs**

(A) HDLECs were cultured for 4 h in the presence or absence of BMP-10 or BMP-9. The increased expression of *ID-1* by BMP-10 was equivalent to that by BMP-9. (B) The proliferation assay was performed when HDLECs were cultured for 48 h in the presence or absence of BMP-10 or BMP-9. The effect of BMP-10 on the proliferation of HDLECs was equivalent to that of BMP-9. (C) The expression levels of *PROX1* mRNAs were examined using the same cDNAs as in A. The decreased expression of *PROX1* by BMP-10 was equivalent to that by BMP-9.

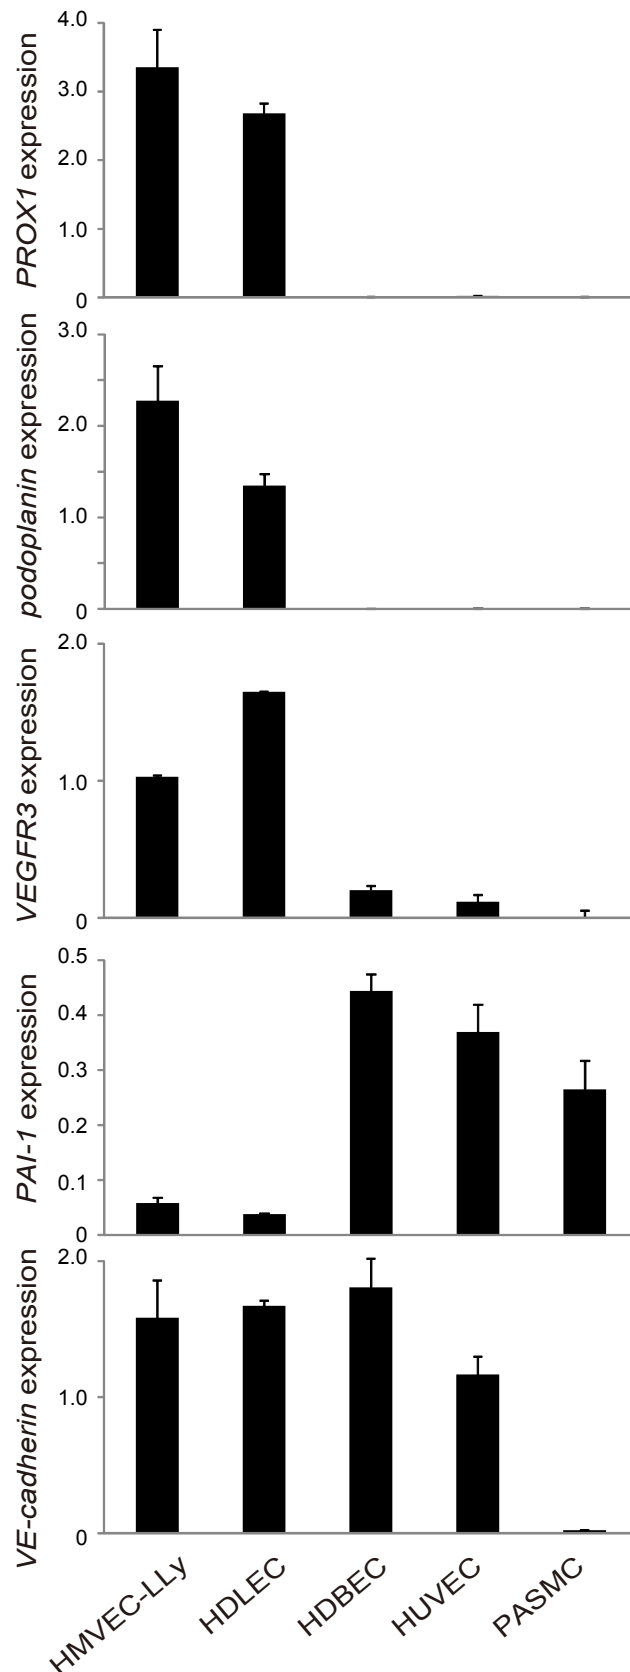

**Fig. S15. Characterization of HDLEC and HMVEC-LLy**

Analysis of the expression of *PROX1*, *podoplanin*, *VEGFR3*, *PAI-1* and *VE-cadherin* in HMVEC-LLy, HDLEC, HDBEC, HUVEC (human umbilical vein endothelial cell) and PASMC (pulmonary artery smooth muscle cell). Note that both HDLEC and HMVEC-LLy preferentially express *PROX1*, *podoplanin* and *VEGFR3*, markers for lymphatic endothelial cells.

**Table S1. List of genes whose expression levels were downregulated or upregulated more than 2 fold at 4 h after BMP-9 treatment, related to Figures 4 and 5.**

**Downregulated genes**

| Probe ID | Gene Symbol | Fold Change<br>(BMP-9/Control) | Gene Description                                                                             |
|----------|-------------|--------------------------------|----------------------------------------------------------------------------------------------|
| 7987066  |             | 0.236                          |                                                                                              |
| 7979241  | BMP4        | 0.280                          | bone morphogenetic protein 4                                                                 |
| 8012906  |             | 0.298                          |                                                                                              |
| 7938390  | ADM         | 0.299                          | adrenomedullin                                                                               |
| 7922337  | TNFSF18     | 0.299                          | tumor necrosis factor (ligand) superfamily, member 18                                        |
| 8123405  | LOC441179   | 0.304                          | chromosome 6 open reading frame 123   hypothetical LOC441179                                 |
| 8057797  | SDPR        | 0.306                          | serum deprivation response   serum deprivation response (phosphatidylserine binding protein) |
| 8138504  | RAPGEF5     | 0.317                          | Rap guanine nucleotide exchange factor (GEF) 5                                               |
| 7909681  | PROX1       | 0.321                          | prospero homeobox 1                                                                          |
| 7908597  | NR5A2       | 0.333                          | nuclear receptor subfamily 5, group A, member 2                                              |
| 7917649  | TGFBR3      | 0.339                          | transforming growth factor, beta receptor III                                                |
| 8143781  | GIMAP6      | 0.339                          | GTPase, IMAP family member 6                                                                 |
| 7933204  | C10orf10    | 0.344                          | chromosome 10 open reading frame 10                                                          |
| 8084951  | LRRC33      | 0.346                          | leucine rich repeat containing 33   phosphatidylinositol glycan anchor biosynthesis, class X |
| 7959251  | P2RX7       | 0.355                          | purinergic receptor P2X, ligand-gated ion channel, 7                                         |
| 8138799  | TRIL        | 0.359                          | TLR4 interactor with leucine rich repeats                                                    |
| 8058201  |             | 0.367                          |                                                                                              |
| 8020806  | RNF125      | 0.370                          | ring finger protein 125                                                                      |
| 8051573  | CDC42EP3    | 0.371                          | CDC42 effector protein (Rho GTPase binding) 3                                                |
| 8131666  | ITGB8       | 0.374                          | integrin, beta 8                                                                             |
| 8004255  | BCL6B       | 0.374                          | B-cell CLL/lymphoma 6, member B   B-cell CLL/lymphoma 6, member B (zinc finger protein)      |
| 8164252  | SH2D3C      | 0.379                          | SH2 domain containing 3C                                                                     |
| 7962212  | PKP2        | 0.386                          | plakophilin 2                                                                                |
| 8137257  | GIMAP5      | 0.387                          | GTPase, IMAP family member 5                                                                 |
| 8003298  | SLC7A5      | 0.388                          | solute carrier family 7 (cationic amino acid transporter, y+ system), member 5               |



|         |         |       |                                                                          |
|---------|---------|-------|--------------------------------------------------------------------------|
| 8051814 | ZFP36L2 | 0.392 | zinc finger protein 36, C3H type-like 2                                  |
| 8118863 | ANKS1A  | 0.392 | ankyrin repeat and sterile alpha motif domain containing 1A              |
| 8148317 | MYC     | 0.393 | v-myc myelocytomatosis viral oncogene homolog (avian)                    |
| 8069448 |         | 0.404 |                                                                          |
| 7908125 | RGL1    | 0.405 | ral guanine nucleotide dissociation stimulator-like 1                    |
| 7965040 | PHLDA1  | 0.405 | pleckstrin homology-like domain, family A, member 1                      |
| 7926484 |         | 0.408 |                                                                          |
| 8154233 | CD274   | 0.410 |                                                                          |
| 7923034 | B3GALT2 | 0.410 | UDP-Gal:betaGlcNAc beta 1,3-galactosyltransferase, polypeptide 2         |
| 8106170 | TMEM171 | 0.413 | transmembrane protein 171                                                |
| 8060344 | TRIB3   | 0.414 | tribbles homolog 3 (Drosophila)                                          |
| 8083594 | PTX3    | 0.415 | pentraxin 3, long   pentraxin-related gene, rapidly induced by IL-1 beta |
| 8017843 | SLC16A6 | 0.416 | solute carrier family 16, member 6 (monocarboxylic acid transporter 7)   |
| 8112202 | PLK2    | 0.416 | polo-like kinase 2 (Drosophila)                                          |
| 7980828 | CCDC88C | 0.421 | coiled-coil domain containing 88C                                        |
| 8012953 | TRIM16  | 0.422 | tripartite motif-containing 16                                           |
| 8065569 | BCL2L1  | 0.425 | BCL2-like 1                                                              |
| 8172266 |         | 0.426 | microRNA 221                                                             |
| 8138353 | MEOX2   | 0.428 | mesenchyme homeobox 2                                                    |
| 8122222 | PDE7B   | 0.433 | phosphodiesterase 7B                                                     |
| 8060850 | BMP2    | 0.440 | bone morphogenetic protein 2                                             |
| 7926443 |         | 0.442 |                                                                          |
| 8068593 | ETS2    | 0.444 | v-ets erythroblastosis virus E26 oncogene homolog 2 (avian)              |
| 7974316 | FRMD6   | 0.448 | FERM domain containing 6                                                 |
| 8096116 | AGPAT9  | 0.450 | 1-acylglycerol-3-phosphate O-acyltransferase 9                           |
| 7979813 | ZFP36L1 | 0.450 | zinc finger protein 36, C3H type-like 1                                  |
| 7977854 | JUB     | 0.457 | jub, ajuba homolog (Xenopus laevis)                                      |
| 7940160 | DTX4    | 0.459 | deltex homolog 4 (Drosophila)                                            |
| 8078380 | ZNF860  | 0.460 | zinc finger protein 860                                                  |
| 7980537 | STON2   | 0.462 | stonin 2                                                                 |
| 7982854 | DLL4    | 0.468 | delta-like 4 (Drosophila)                                                |

|         |           |       |                                                                                                                                          |
|---------|-----------|-------|------------------------------------------------------------------------------------------------------------------------------------------|
| 8178435 | IER3      | 0.468 | immediate early response 3                                                                                                               |
| 7912706 | EPHA2     | 0.468 | EPH receptor A2                                                                                                                          |
| 8124848 | IER3      | 0.469 | immediate early response 3                                                                                                               |
| 8179704 | IER3      | 0.469 | immediate early response 3                                                                                                               |
| 8040419 | MYCN      | 0.471 | v-myc myelocytomatosis viral related oncogene, neuroblastoma derived (avian)                                                             |
| 7922343 | TNFSF4    | 0.475 | tumor necrosis factor (ligand) superfamily, member 4                                                                                     |
| 8123606 | MGC39372  | 0.478 |                                                                                                                                          |
| 8099240 |           | 0.479 |                                                                                                                                          |
| 8107857 |           | 0.479 |                                                                                                                                          |
| 8155930 | GCNT1     | 0.482 | glucosaminyl (N-acetyl) transferase 1, core 2   glucosaminyl (N-acetyl) transferase 1, core 2 (beta-1,6-N-acetylglucosaminyltransferase) |
| 8005475 | TRIM16L   | 0.483 | tripartite motif-containing 16-like   tripartite motif-containing 16                                                                     |
| 8137252 | GIMAP1    | 0.483 | GTPase, IMAP family member 1                                                                                                             |
| 8131881 | C7orf46   | 0.484 | chromosome 7 open reading frame 46                                                                                                       |
| 8067955 | CXADR     | 0.485 | coxsackie virus and adenovirus receptor                                                                                                  |
| 7977270 | LOC388022 | 0.486 | hypothetical gene supported by AK131040                                                                                                  |
| 8092134 | PLD1      | 0.486 | phospholipase D1, phosphatidylcholine-specific                                                                                           |
| 8012949 | CDRT1     | 0.488 | CMT1A duplicated region transcript 1   F-box and WD repeat domain containing 10   tripartite motif-containing 16                         |
| 8138289 | ETV1      | 0.490 | ets variant 1                                                                                                                            |
| 8125123 |           | 0.495 |                                                                                                                                          |
| 8137232 | GIMAP8    | 0.497 | GTPase, IMAP family member 8                                                                                                             |
| 7923753 | NUAK2     | 0.498 | NUAK family, SNF1-like kinase, 2                                                                                                         |

### Upregulated genes

| Probe ID | Gene Symbol | Fold Change<br>(BMP-9/Control) | Gene Description                                                                      |
|----------|-------------|--------------------------------|---------------------------------------------------------------------------------------|
| 7922976  | PTGS2       | 12.833                         | prostaglandin-endoperoxide synthase 2 (prostaglandin G/H synthase and cyclooxygenase) |
| 7984353  | SMAD6       | 9.845                          | SMAD family member 6                                                                  |
| 8151457  | HEY1        | 9.129                          | hairy/enhancer-of-split related with YRPW motif 1                                     |

|         |          |       |                                                                                             |
|---------|----------|-------|---------------------------------------------------------------------------------------------|
| 8023220 | SMAD7    | 8.402 | SMAD family member 7                                                                        |
| 8008627 | NOG      | 8.305 | noggin                                                                                      |
| 8040103 | ID2      | 6.862 | inhibitor of DNA binding 2, dominant negative helix-loop-helix protein                      |
| 7899939 | GJA4     | 6.596 | gap junction protein, alpha 4, 37kDa                                                        |
| 8078397 | CMTM8    | 6.224 | CKLF-like MARVEL transmembrane domain containing 8                                          |
| 8142765 | LRRC4    | 5.947 | leucine rich repeat containing 4                                                            |
| 7922229 | SELE     | 5.727 | selectin E                                                                                  |
| 8146115 | C8orf4   | 5.277 | chromosome 8 open reading frame 4                                                           |
| 8112615 | ENC1     | 4.623 | ectodermal-neural cortex 1 (with BTB-like domain)   ectodermal-neural cortex (with BTB-like |
| 8063382 | SNAI1    | 3.935 | snail homolog 1 (Drosophila)                                                                |
| 7976698 | EML1     | 3.845 | echinoderm microtubule associated protein like 1                                            |
| 8043995 | IL1R1    | 3.836 | interleukin 1 receptor, type I                                                              |
| 8108447 | CXXC5    | 3.678 | CXXC finger 5                                                                               |
| 7951662 | CRYAB    | 3.614 | crystallin, alpha B                                                                         |
| 8143341 | JHDM1D   | 3.610 | jumonji C domain containing histone demethylase 1 homolog D (S. cerevisiae)                 |
| 8016832 | MMD      | 3.531 | monocyte to macrophage differentiation-associated                                           |
| 8130674 | PDE10A   | 3.342 | phosphodiesterase 10A                                                                       |
| 8129804 | MAP3K5   | 3.250 | mitogen-activated protein kinase kinase kinase 5                                            |
| 8141843 | RASA4P   | 3.077 | RAS p21 protein activator 4   similar to HSPC047 protein                                    |
| 8047248 | PLCL1    | 3.050 | phospholipase C-like 1                                                                      |
| 7926875 | BAMBI    | 3.022 | BMP and activin membrane-bound inhibitor homolog (Xenopus laevis)                           |
| 8088550 | PRICKLE2 | 3.011 | prickle homolog 2 (Drosophila)                                                              |
| 7971015 | SMAD9    | 2.990 | SMAD family member 9                                                                        |
| 8143441 | KIAA1147 | 2.985 |                                                                                             |
| 8087907 | SEMA3G   | 2.962 | sema domain, immunoglobulin domain (Ig), short basic domain, secreted, (semaphorin) 3G      |
| 7928189 | UNC5B    | 2.940 | unc-5 homolog B (C. elegans)                                                                |
| 7924058 | IRF6     | 2.920 | interferon regulatory factor 6                                                              |
| 8080964 | GLT8D4   | 2.885 | glucoside xylosyltransferase 2   glycosyltransferase 8 domain containing 4                  |
| 7898693 | ALPL     | 2.858 | alkaline phosphatase, liver/bone/kidney                                                     |
| 7966690 | TBX3     | 2.816 | T-box 3                                                                                     |
| 7915682 | ZSWIM5   | 2.767 | zinc finger, SWIM-type containing 5                                                         |

|         |           |       |                                                                                                  |
|---------|-----------|-------|--------------------------------------------------------------------------------------------------|
| 7933194 | CXCL12    | 2.743 | chemokine (C-X-C motif) ligand 12   chemokine (C-X-C motif) ligand 12 (stromal cell-derived      |
| 8128565 | POPDC3    | 2.738 | popeye domain containing 3                                                                       |
| 8147132 | CA2       | 2.700 | carbonic anhydrase II                                                                            |
| 8103822 | VEGFC     | 2.593 | vascular endothelial growth factor C                                                             |
| 8107850 | CHSY3     | 2.592 | chondroitin sulfate synthase 3                                                                   |
| 7962375 | PRICKLE1  | 2.579 | prickle homolog 1 (Drosophila)                                                                   |
| 7909225 | DYRK3     | 2.562 | dual-specificity tyrosine-(Y)-phosphorylation regulated kinase 3                                 |
| 8095299 |           | 2.540 |                                                                                                  |
| 8139796 | LOC441233 | 2.517 |                                                                                                  |
| 8078014 | SLC6A6    | 2.515 | solute carrier family 6 (neurotransmitter transporter, taurine), member 6                        |
| 7932495 | C10orf114 | 2.493 | chromosome 10 open reading frame 114                                                             |
| 8043244 | ATOH8     | 2.480 | atonal homolog 8 (Drosophila)                                                                    |
| 8104901 | IL7R      | 2.479 | interleukin 7 receptor                                                                           |
| 8155547 | LOC442421 | 2.472 | hypothetical LOC442421   similar to hCG2039164                                                   |
| 8128553 | BVES      | 2.466 | blood vessel epicardial substance                                                                |
| 7993588 | TMC7      | 2.464 | transmembrane channel-like 7                                                                     |
| 8059376 | SERPINE2  | 2.450 | serpin peptidase inhibitor, clade E (nexin, plasminogen activator inhibitor type 1), member 2    |
| 8160712 | SUGT1P    | 2.445 | suppressor of G2 allele of SKP1 pseudogene 1 (S. cerevisiae)                                     |
| 8027604 | KIAA0355  | 2.430 |                                                                                                  |
| 8095744 | AREG      | 2.429 | amphiregulin                                                                                     |
|         |           |       | RAS p21 protein activator 4   RAS p21 protein activator 4 pseudogene   RAS p21 protein activator |
| 8141803 |           | 2.414 | 4B   polymerase (RNA) II (DNA directed) polypeptide J4, pseudogene   similar to calcium-         |
|         | RASA4     |       | promoted Ras inactivator   similar to HSPC047 protein                                            |
| 7954717 | BICD1     | 2.408 | bicaudal D homolog 1 (Drosophila)                                                                |
| 8030002 | ZNF114    | 2.388 | zinc finger protein 114                                                                          |
| 8093518 | FGFR3     | 2.387 | fibroblast growth factor receptor 3                                                              |
| 7950743 | RAB30     | 2.385 |                                                                                                  |
| 7932598 | ENKUR     | 2.368 | enkurin, TRPC channel interacting protein                                                        |
| 8013319 | GRAP      | 2.361 | GRB2-related adaptor protein                                                                     |
| 8129677 | SGK1      | 2.346 | serum/glucocorticoid regulated kinase 1                                                          |
| 8095736 | AREG      | 2.342 | amphiregulin                                                                                     |

|         |           |                                                                                                                                                                                                             |
|---------|-----------|-------------------------------------------------------------------------------------------------------------------------------------------------------------------------------------------------------------|
| 7918902 | CD58      | 2.332                                                                                                                                                                                                       |
| 7986092 | FURIN     | 2.326 furin (paired basic amino acid cleaving enzyme)                                                                                                                                                       |
| 7979351 |           | 2.318 chromosome 14 open reading frame 33                                                                                                                                                                   |
| 8090823 | SLCO2A1   | 2.318 solute carrier organic anion transporter family, member 2A1                                                                                                                                           |
| 8056005 | ACVR1     | 2.309 activin A receptor, type I                                                                                                                                                                            |
| 8168161 |           | 2.295                                                                                                                                                                                                       |
| 7940987 |           | 2.291                                                                                                                                                                                                       |
| 7929256 |           | 2.291                                                                                                                                                                                                       |
| 8005549 | GRAPL     | 2.288 GRB2-related adaptor protein-like   GRB2-related adaptor protein                                                                                                                                      |
| 8152280 | LRP12     | 2.237 low density lipoprotein receptor-related protein 12   low density lipoprotein-related protein 12                                                                                                      |
| 7937039 | EBF3      | 2.233 early B-cell factor 3                                                                                                                                                                                 |
| 8105506 | ZSWIM6    | 2.212 zinc finger, SWIM-type containing 6                                                                                                                                                                   |
| 8085716 | SATB1     | 2.200 SATB homeobox 1                                                                                                                                                                                       |
| 8035793 |           | 2.198 zinc finger protein 737                                                                                                                                                                               |
| 8008885 | MIR21     | 2.163 microRNA 21                                                                                                                                                                                           |
| 7943424 | BIRC2     | 2.149 baculoviral IAP repeat-containing 2                                                                                                                                                                   |
| 8161373 | LOC441426 | 2.147                                                                                                                                                                                                       |
| 8161554 | LOC441426 | 2.147                                                                                                                                                                                                       |
| 7904907 | BCL9      | 2.144 B-cell CLL/lymphoma 9<br>killer cell immunoglobulin-like receptor, two domains, long cytoplasmic tail, 3   killer cell                                                                                |
| 8031293 |           | 2.142 immunoglobulin-like receptor, two domains, long cytoplasmic tail, 1   killer cell immunoglobulin-like receptor, two domains, long cytoplasmic tail, 2   killer cell immunoglobulin-like receptor, two |
|         | KIR2DL3   |                                                                                                                                                                                                             |
| 8081069 | ZNF654    | 2.132 zinc finger protein 654                                                                                                                                                                               |
| 8043283 | KDM3A     | 2.129 lysine (K)-specific demethylase 3A                                                                                                                                                                    |
| 7972175 |           | 2.123                                                                                                                                                                                                       |
| 7976556 | C14orf132 | 2.122 chromosome 14 open reading frame 132                                                                                                                                                                  |
| 8157610 | DAB2IP    | 2.109 DAB2 interacting protein                                                                                                                                                                              |
| 7942674 | TSKU      | 2.108 tsukushi small leucine rich proteoglycan homolog ( <i>Xenopus laevis</i> )   tsukushin                                                                                                                |
| 7995681 | MMP2      | 2.100 matrix metalloproteinase 2 (gelatinase A, 72kDa gelatinase, 72kDa type IV collagenase)                                                                                                                |
| 7965226 | RASSF9    | 2.099 Ras association (RalGDS/AF-6) domain family (N-terminal) member 9                                                                                                                                     |
| 8114814 | NR3C1     | 2.097 nuclear receptor subfamily 3, group C, member 1 (glucocorticoid receptor)                                                                                                                             |

|         |          |                                                                                                                                  |
|---------|----------|----------------------------------------------------------------------------------------------------------------------------------|
| 7926105 | GATA3    | 2.090 GATA binding protein 3<br>RAS p21 protein activator 4   RAS p21 protein activator 4 pseudogene   RAS p21 protein activator |
| 8141768 | RASA4    | 2.089 4B   polymerase (RNA) II (DNA directed) polypeptide J4, pseudogene   similar to calcium-                                   |
| 7897737 | C1orf187 | 2.089 chromosome 1 open reading frame 187                                                                                        |
| 8021169 | LIPG     | 2.087 lipase, endothelial                                                                                                        |
| 8111101 | ANKH     | 2.079 ankylosis, progressive homolog (mouse)                                                                                     |
| 8020495 | CABLES1  | 2.072 Cdk5 and Abl enzyme substrate 1                                                                                            |
| 7985493 | TM6SF1   | 2.071 transmembrane 6 superfamily member 1                                                                                       |
| 8156848 | NR4A3    | 2.062 nuclear receptor subfamily 4, group A, member 3   Ewing sarcoma breakpoint region 1                                        |
| 8101429 | PLAC8    | 2.060 placenta-specific 8                                                                                                        |
| 8170704 | ABCD1    | 2.055 ATP-binding cassette, sub-family D (ALD), member 1                                                                         |
| 8151496 | ZNF704   | 2.047 zinc finger protein 704                                                                                                    |
| 8050719 | ITSN2    | 2.039 intersectin 2                                                                                                              |
| 7934993 | NUDT9P1  | 2.039 nudix (nucleoside diphosphate linked moiety X)-type motif 9 pseudogene 1                                                   |
| 8146579 | CHD7     | 2.038 chromodomain helicase DNA binding protein 7                                                                                |
| 7928291 | CHST3    | 2.034 carbohydrate (chondroitin 6) sulfotransferase 3                                                                            |
| 8130185 | ZBTB2    | 2.016 zinc finger and BTB domain containing 2                                                                                    |
| 7972713 | EFNB2    | 2.011 ephrin-B2                                                                                                                  |

**Table S2. List of genes whose expression levels were downregulated or upregulated more than 2 fold at 24 h after BMP-9 treatment, related to Figures 4 and 5.**

**Downregulated genes**

| Probe ID | Gene Symbol | Fold Change<br>(BMP- | Gene Description                                                                                                                    |
|----------|-------------|----------------------|-------------------------------------------------------------------------------------------------------------------------------------|
| 7922337  | TNFSF18     | 0.082                | tumor necrosis factor (ligand) superfamily, member 18                                                                               |
| 7946579  | LYVE1       | 0.102                | lymphatic vessel endothelial hyaluronan receptor 1                                                                                  |
| 7928126  | KIAA1274    | 0.123                |                                                                                                                                     |
| 8006433  | CCL2        | 0.133                | chemokine (C-C motif) ligand 2                                                                                                      |
| 7984704  | NEO1        | 0.177                | neogenin homolog 1 (chicken)                                                                                                        |
| 8129953  | HIVEP2      | 0.210                | human immunodeficiency virus type I enhancer binding protein 2                                                                      |
| 8138504  | RAPGEF5     | 0.212                | Rap guanine nucleotide exchange factor (GEF) 5                                                                                      |
| 8130556  | SOD2        | 0.221                | superoxide dismutase 2, mitochondrial                                                                                               |
| 8138353  | MEOX2       | 0.224                | mesenchyme homeobox 2                                                                                                               |
| 8172254  | CXorf36     | 0.239                | chromosome X open reading frame 36                                                                                                  |
| 8093858  | STK32B      | 0.239                | serine/threonine kinase 32B                                                                                                         |
| 7997491  | HSD17B2     | 0.240                | hydroxysteroid (17-beta) dehydrogenase 2                                                                                            |
| 7951271  | MMP1        | 0.243                | matrix metalloproteinase 1 (interstitial collagenase)                                                                               |
| 8113709  | LOX         | 0.245                | lysyl oxidase                                                                                                                       |
| 7954293  | PDE3A       | 0.255                | phosphodiesterase 3A, cGMP-inhibited                                                                                                |
| 8129363  | HDDC2       | 0.258                | HD domain containing 2                                                                                                              |
| 8047763  |             | 0.262                |                                                                                                                                     |
| 8149825  | STC1        | 0.273                | stanniocalcin 1                                                                                                                     |
| 8123405  | LOC441179   | 0.276                | chromosome 6 open reading frame 123   hypothetical LOC441179                                                                        |
| 7994074  | SCNN1B      | 0.276                | sodium channel, nonvoltage-gated 1, beta                                                                                            |
| 7936494  | GFRA1       | 0.277                | GDNF family receptor alpha 1                                                                                                        |
| 7938390  | ADM         | 0.280                | adrenomedullin                                                                                                                      |
| 8155414  | ANKRD20B    | 0.282                | ankyrin repeat domain 20B   coiled-coil domain containing 29   hypothetical LOC644249   similar to coiled-coil domain containing 29 |
| 8161384  | ANKRD20B    | 0.282                | coiled-coil domain containing 29   hypothetical LOC644249   similar to coiled-coil domain                                           |

|         |          |       |                                                                                                                                     |
|---------|----------|-------|-------------------------------------------------------------------------------------------------------------------------------------|
| 8112202 | PLK2     | 0.284 | polo-like kinase 2 (Drosophila)                                                                                                     |
| 8138799 | TRIL     | 0.286 | TLR4 interactor with leucine rich repeats                                                                                           |
| 8144503 |          | 0.287 | family with sequence similarity 86, member A pseudogene                                                                             |
| 8025601 | ICAM1    | 0.289 | intercellular adhesion molecule 1                                                                                                   |
| 8166157 | BMX      | 0.290 |                                                                                                                                     |
| 8120967 | NT5E     | 0.291 | 5'-nucleotidase, ecto (CD73)                                                                                                        |
| 8155591 | ANKRD20B | 0.295 | ankyrin repeat domain 20B   hypothetical LOC644249   coiled-coil domain containing 29                                               |
| 8161415 | ANKRD20B | 0.300 | coiled-coil domain containing 29   hypothetical LOC644249   similar to hCG1744891                                                   |
| 8106820 | POLR3G   | 0.305 | polymerase (RNA) III (DNA directed) polypeptide G (32kD)                                                                            |
| 7938329 | SNORA23  | 0.306 | small nucleolar RNA, H/ACA box 23                                                                                                   |
| 7903854 | SLC6A17  | 0.308 | solute carrier family 6, member 17                                                                                                  |
| 7970954 | DCLK1    | 0.315 | doublecortin-like kinase 1                                                                                                          |
| 8175016 | APLN     | 0.315 | apelin                                                                                                                              |
| 8130811 | C6orf123 | 0.316 | chromosome 6 open reading frame 123   hypothetical LOC441179                                                                        |
| 8130982 | C6orf123 | 0.316 | chromosome 6 open reading frame 123   hypothetical LOC441179                                                                        |
| 7991602 | PCSK6    | 0.316 | proprotein convertase subtilisin/kexin type 6                                                                                       |
| 7959267 | P2RX4    | 0.319 | purinergic receptor P2X, ligand-gated ion channel, 4                                                                                |
| 8007323 | CNTNAP1  | 0.324 | contactin associated protein 1                                                                                                      |
| 8126093 |          | 0.324 |                                                                                                                                     |
| 8097335 | HSPA4L   | 0.326 | heat shock 70kDa protein 4-like                                                                                                     |
| 7959251 | P2RX7    | 0.330 | purinergic receptor P2X, ligand-gated ion channel, 7                                                                                |
| 8003859 |          | 0.332 |                                                                                                                                     |
| 8126086 | TMEM217  | 0.337 | transmembrane protein 217                                                                                                           |
| 8140478 | PION     | 0.339 | pigeon homolog (Drosophila)                                                                                                         |
| 8053737 | ANKRD20B | 0.339 | ankyrin repeat domain 20B   coiled-coil domain containing 29   hypothetical LOC644249   similar to coiled-coil domain containing 29 |
| 8156043 | PSAT1    | 0.341 | phosphoserine aminotransferase 1                                                                                                    |
| 7995797 | MT1E     | 0.341 | metallothionein 1E                                                                                                                  |
| 7998784 | ABCA3    | 0.343 | ATP-binding cassette, sub-family A (ABC1), member 3                                                                                 |
| 7901272 | CYP4X1   | 0.347 | cytochrome P450, family 4, subfamily X, polypeptide 1                                                                               |
| 8115851 | STC2     | 0.348 | stanniocalcin 2                                                                                                                     |



|         |              |       |                                                                                              |
|---------|--------------|-------|----------------------------------------------------------------------------------------------|
| 8057797 | SDPR         | 0.348 | serum deprivation response   serum deprivation response (phosphatidylserine binding protein) |
| 7948229 | SLC43A3      | 0.352 | solute carrier family 43, member 3                                                           |
| 8104022 | PDLIM3       | 0.355 | PDZ and LIM domain 3                                                                         |
| 8055465 | CXCR4        | 0.357 | chemokine (C-X-C motif) receptor 4                                                           |
| 7995783 | MT2A         | 0.361 | metallothionein 2A                                                                           |
| 8121277 | AIM1         | 0.365 | absent in melanoma 1                                                                         |
| 8097282 | SPRY1        | 0.365 | sprouty homolog 1, antagonist of FGF signaling (Drosophila)                                  |
| 7968351 | C13orf33     | 0.368 | chromosome 13 open reading frame 33                                                          |
| 8113504 | C5orf13      | 0.370 | chromosome 5 open reading frame 13                                                           |
| 8001197 | NETO2        | 0.371 | neuropilin (NRP) and tolloid (TLL)-like 2                                                    |
| 8105302 | FST          | 0.372 | follicle-stimulating hormone receptor-like 1                                                 |
| 7908597 | NR5A2        | 0.375 | nuclear receptor subfamily 5, group A, member 2                                              |
| 7965094 | E2F7         | 0.379 | E2F transcription factor 7                                                                   |
| 8035566 | HOMER3       | 0.380 | homer homolog 3 (Drosophila)                                                                 |
| 7926127 | CUGBP2       | 0.380 | CUGBP, Elav-like family member 2   CUG triplet repeat, RNA binding protein 2                 |
| 8109086 | ADRB2        | 0.380 | adrenergic, beta-2-, receptor, surface                                                       |
| 8075635 |              | 0.387 | TIMP metalloproteinase inhibitor 3                                                           |
| 8092970 | APOD         | 0.388 | apolipoprotein D                                                                             |
| 8140468 | PION         | 0.389 | pigeon homolog (Drosophila)                                                                  |
| 8085984 | OSBPL10      | 0.389 | oxysterol binding protein-like 10                                                            |
| 8114920 | DPYSL3       | 0.392 | dihydropyrimidinase-like 3                                                                   |
| 7974341 | GNG2         | 0.397 | guanine nucleotide binding protein (G protein), gamma 2                                      |
| 8013015 | CENPV        | 0.398 | centromere protein V                                                                         |
| 8148448 | KHDRBS3      | 0.399 | KH domain containing, RNA binding, signal transduction associated 3                          |
| 8138489 | CDCA7L       | 0.401 | cell division cycle associated 7-like                                                        |
| 8145685 |              | 0.404 |                                                                                              |
| 7974316 | FRMD6        | 0.404 | FERM domain containing 6                                                                     |
| 7988444 | MYEF2        | 0.405 | myelin expression factor 2   solute carrier family 24, member 5                              |
| 7952350 | SCN3B        | 0.407 | sodium channel, voltage-gated, type III, beta                                                |
| 8107706 | LMNB1        | 0.408 | lamin B1                                                                                     |
| 8056963 | LOC100129455 | 0.409 |                                                                                              |

|         |          |       |                                                                                         |
|---------|----------|-------|-----------------------------------------------------------------------------------------|
| 8045009 | GYPC     | 0.409 | glycophorin C (Gerbich blood group)                                                     |
| 7957338 | SYT1     | 0.413 | synaptotagmin I                                                                         |
| 8141094 | PDK4     | 0.413 | pyruvate dehydrogenase kinase, isozyme 4                                                |
| 8102950 | INPP4B   | 0.416 | inositol polyphosphate-4-phosphatase, type II, 105kDa                                   |
| 8162531 | MT1G     | 0.417 |                                                                                         |
| 8060675 | CDC25B   | 0.417 | cell division cycle 25 homolog B ( <i>S. pombe</i> )                                    |
| 7980828 | CCDC88C  | 0.418 | coiled-coil domain containing 88C                                                       |
| 8004255 | BCL6B    | 0.418 | B-cell CLL/lymphoma 6, member B   B-cell CLL/lymphoma 6, member B (zinc finger protein) |
| 8012906 |          | 0.418 |                                                                                         |
| 7924450 | DUSP10   | 0.419 | dual specificity phosphatase 10                                                         |
| 8017547 | ICAM2    | 0.422 | intercellular adhesion molecule 2                                                       |
| 7905789 | IL6R     | 0.422 | interleukin 6 receptor                                                                  |
| 8081546 |          | 0.424 |                                                                                         |
| 7909789 | TGFB2    | 0.427 | transforming growth factor, beta 2                                                      |
| 8047738 | NRP2     | 0.428 | neuropilin 2                                                                            |
| 8104234 | TRIP13   | 0.428 | thyroid hormone receptor interactor 13   bromodomain containing 9                       |
| 8151447 | IL7      | 0.428 | interleukin 7                                                                           |
| 7994058 | SCNN1G   | 0.429 | sodium channel, nonvoltage-gated 1, gamma                                               |
| 7897801 | RNU5E    | 0.430 | RNA, U5E small nuclear                                                                  |
| 8156199 | DAPK1    | 0.430 | death-associated protein kinase 1                                                       |
| 7902957 | EPHX4    | 0.430 | epoxide hydrolase 4                                                                     |
| 8144036 | XRCC2    | 0.431 | X-ray repair complementing defective repair in Chinese hamster cells 2                  |
| 8130578 | SNORA20  | 0.432 | small nucleolar RNA, H/ACA box 20                                                       |
| 8020806 | RNF125   | 0.434 | ring finger protein 125                                                                 |
| 7922343 | TNFSF4   | 0.436 | tumor necrosis factor (ligand) superfamily, member 4                                    |
| 8139500 | TNS3     | 0.437 | tensin 3                                                                                |
| 8160260 | BNC2     | 0.437 | basonuclin 2                                                                            |
| 7985873 | C15orf42 | 0.438 | chromosome 15 open reading frame 42                                                     |
| 8096116 | AGPAT9   | 0.440 | 1-acylglycerol-3-phosphate O-acyltransferase 9                                          |
| 8100362 | LNX1     | 0.440 | ligand of numb-protein X 1   FIP1 like 1 ( <i>S. cerevisiae</i> )                       |
| 7951363 | CASP12   | 0.440 | caspase 12 (gene/pseudogene)                                                            |

|         |          |       |                                                                                                                                     |
|---------|----------|-------|-------------------------------------------------------------------------------------------------------------------------------------|
| 8020349 | ANKRD20B | 0.441 | coiled-coil domain containing 29   hypothetical LOC644249                                                                           |
| 8095986 | ANXA3    | 0.441 | annexin A3                                                                                                                          |
| 8098549 | STOX2    | 0.442 | storkhead box 2                                                                                                                     |
| 7909708 | CENPF    | 0.442 | centromere protein F, 350/400ka (mitosin)                                                                                           |
| 8012403 | AURKB    | 0.443 | aurora kinase B                                                                                                                     |
| 7918157 | VAV3     | 0.443 | vav 3 guanine nucleotide exchange factor                                                                                            |
| 8146544 | UBXN2B   | 0.444 | UBX domain protein 2B                                                                                                               |
| 7898809 | EPHB2    | 0.444 | EPH receptor B2                                                                                                                     |
| 8079237 | KIF15    | 0.445 | kinesin family member 15                                                                                                            |
| 8023757 | CD226    | 0.447 |                                                                                                                                     |
| 7932826 | KIAA1462 | 0.447 |                                                                                                                                     |
| 7984540 | KIF23    | 0.449 | kinesin family member 23                                                                                                            |
| 8056877 | CHRNA1   | 0.449 | cholinergic receptor, nicotinic, alpha 1 (muscle)                                                                                   |
| 8113666 | SEMA6A   | 0.449 | sema domain, transmembrane domain (TM), and cytoplasmic domain, (semaphorin) 6A                                                     |
| 8130408 | IPCEF1   | 0.450 | interaction protein for cytohesin exchange factors 1                                                                                |
| 8172266 |          | 0.451 | microRNA 221                                                                                                                        |
| 8048864 | CCL20    | 0.451 | chemokine (C-C motif) ligand 20                                                                                                     |
| 8046536 | HOXD10   | 0.451 | homeobox D10                                                                                                                        |
| 7909877 | MOSC1    | 0.452 | MOCO sulphurase C-terminal domain containing 1                                                                                      |
| 8058869 | TNS1     | 0.452 | tensin 1                                                                                                                            |
| 8153959 | DOCK8    | 0.453 | dedicator of cytokinesis 8                                                                                                          |
| 8008517 | NME1     | 0.454 | non-metastatic cells 1, protein (NM23A) expressed in   NME1-NME2 readthrough   non-metastatic cells 2, protein (NM23B) expressed in |
| 8124537 | HIST1H3J | 0.454 | histone cluster 1, H3j                                                                                                              |
| 7994265 |          | 0.454 |                                                                                                                                     |
| 8153258 | SLC45A4  | 0.454 | solute carrier family 45, member 4                                                                                                  |
| 8095110 | KIT      | 0.454 | v-kit Hardy-Zuckerman 4 feline sarcoma viral oncogene homolog                                                                       |
| 8088803 | EIF4E3   | 0.455 | eukaryotic translation initiation factor 4E family member 3                                                                         |
| 8109120 | AFAP1L1  | 0.457 | actin filament associated protein 1-like 1                                                                                          |
| 8019709 | RNU2-1   | 0.457 | RNA, U2 small nuclear 1   RNA, U2 small nuclear 2   WD repeat domain 74                                                             |
| 7969330 | PCDH17   | 0.457 | protocadherin 17                                                                                                                    |

|         |           |       |                                                                                                                                                                                                               |
|---------|-----------|-------|---------------------------------------------------------------------------------------------------------------------------------------------------------------------------------------------------------------|
| 7915612 |           | 0.458 | patched homolog 2 ( <i>Drosophila</i> )                                                                                                                                                                       |
| 8060850 | BMP2      | 0.462 | bone morphogenetic protein 2                                                                                                                                                                                  |
| 7969533 | SLAIN1    | 0.463 | SLAIN motif family, member 1                                                                                                                                                                                  |
| 8052882 | ADD2      | 0.464 | adducin 2 (beta)                                                                                                                                                                                              |
| 7955063 | TMEM106C  | 0.464 | transmembrane protein 106C                                                                                                                                                                                    |
| 8110430 | N4BP3     | 0.464 | Nedd4 binding protein 3                                                                                                                                                                                       |
| 8046518 |           | 0.466 |                                                                                                                                                                                                               |
| 8003171 | COTL1     | 0.466 | coactosin-like 1 ( <i>Dictyostelium</i> )                                                                                                                                                                     |
| 8085754 | SGOL1     | 0.467 | shugoshin-like 1 ( <i>S. pombe</i> )                                                                                                                                                                          |
| 7940147 | FAM111B   | 0.467 | family with sequence similarity 111, member B                                                                                                                                                                 |
| 7896759 | LOC643837 | 0.467 |                                                                                                                                                                                                               |
| 7937518 | TSPAN4    | 0.468 | tetraspanin 4                                                                                                                                                                                                 |
| 8019631 | RNU2-1    | 0.469 | RNA, U2 small nuclear 1   RNA, U2 small nuclear 2   WD repeat domain 74                                                                                                                                       |
| 8019633 | RNU2-1    | 0.469 | RNA, U2 small nuclear 1   RNA, U2 small nuclear 2   WD repeat domain 74                                                                                                                                       |
| 8019635 | RNU2-1    | 0.469 | RNA, U2 small nuclear 1   RNA, U2 small nuclear 2   WD repeat domain 74                                                                                                                                       |
| 8019637 | RNU2-1    | 0.469 | RNA, U2 small nuclear 1   RNA, U2 small nuclear 2   WD repeat domain 74                                                                                                                                       |
| 8019639 | RNU2-1    | 0.469 | RNA, U2 small nuclear 1   RNA, U2 small nuclear 2   WD repeat domain 74                                                                                                                                       |
| 8019641 | RNU2-1    | 0.469 | RNA, U2 small nuclear 1   RNA, U2 small nuclear 2   WD repeat domain 74                                                                                                                                       |
| 8019703 | RNU2-1    | 0.469 | RNA, U2 small nuclear 1   RNA, U2 small nuclear 2   WD repeat domain 74                                                                                                                                       |
| 8019705 | RNU2-1    | 0.469 | RNA, U2 small nuclear 1   RNA, U2 small nuclear 2   WD repeat domain 74                                                                                                                                       |
| 8019707 | RNU2-1    | 0.469 | RNA, U2 small nuclear 1   RNA, U2 small nuclear 2   WD repeat domain 74                                                                                                                                       |
| 8120838 | TTK       | 0.469 |                                                                                                                                                                                                               |
| 7938485 | MICAL2    | 0.469 | microtubule associated monooxygenase, calponin and LIM domain containing 2                                                                                                                                    |
| 8058390 | RAPH1     | 0.469 | Ras association (RalGDS/AF-6) and pleckstrin homology domains 1                                                                                                                                               |
| 8047127 | MYO1B     | 0.470 | myosin IB                                                                                                                                                                                                     |
| 8053741 |           | 0.471 | ankyrin repeat domain 20B   ankyrin repeat domain 20 family, member A3   ankyrin repeat domain 20 family, member A2   ankyrin repeat domain 20 family, member A1   ankyrin repeat domain 20 family, member A4 |
| 8145122 | SLC39A14  | 0.471 | solute carrier family 39 (zinc transporter), member 14                                                                                                                                                        |
| 8002941 | ADAMTS18  | 0.472 | ADAM metalloproteinase with thrombospondin type 1 motif, 18                                                                                                                                                   |
| 8056968 | LOC375295 | 0.472 |                                                                                                                                                                                                               |

|         |          |       |                                                                                                                                                                                                                                                                                                                              |
|---------|----------|-------|------------------------------------------------------------------------------------------------------------------------------------------------------------------------------------------------------------------------------------------------------------------------------------------------------------------------------|
| 8062119 | MT1P3    | 0.472 | metallothionein 1 pseudogene 3                                                                                                                                                                                                                                                                                               |
| 7937020 | MKI67    | 0.473 | antigen identified by monoclonal antibody Ki-67                                                                                                                                                                                                                                                                              |
| 7917798 | ABCA4    | 0.473 | ATP-binding cassette, sub-family A (ABC1), member 4                                                                                                                                                                                                                                                                          |
| 8019802 | RNU2-1   | 0.473 | RNA, U2 small nuclear 1   RNA, U2 small nuclear 2   WD repeat domain 74                                                                                                                                                                                                                                                      |
| 7957298 | NAV3     | 0.473 | neuron navigator 3                                                                                                                                                                                                                                                                                                           |
| 7948420 | FABP5    | 0.474 | fatty acid binding protein 5 (psoriasis-associated)   fatty acid binding protein 5-like 3 (pseudogene)                                                                                                                                                                                                                       |
| 7975268 | ARG2     | 0.474 | arginase, type II   vesicle transport through interaction with t-SNAREs homolog 1B (yeast)                                                                                                                                                                                                                                   |
| 8067040 | NFATC2   | 0.474 | nuclear factor of activated T-cells, cytoplasmic, calcineurin-dependent 2                                                                                                                                                                                                                                                    |
| 7995793 | MT1L     | 0.475 | metallothionein 1L (gene/pseudogene)                                                                                                                                                                                                                                                                                         |
| 8138527 | MGC87042 | 0.476 |                                                                                                                                                                                                                                                                                                                              |
| 7910146 | PSEN2    | 0.476 | presenilin 2 (Alzheimer disease 4)                                                                                                                                                                                                                                                                                           |
| 8116445 | FLT4     | 0.477 | fms-related tyrosine kinase 4                                                                                                                                                                                                                                                                                                |
| 8097356 | PLK4     | 0.478 | polo-like kinase 4 (Drosophila)                                                                                                                                                                                                                                                                                              |
| 8147049 | FABP5    | 0.478 | fatty acid binding protein 5 (psoriasis-associated)   fatty acid binding protein 5-like 3 (pseudogene)                                                                                                                                                                                                                       |
| 7922889 | IVNS1ABP | 0.478 | influenza virus NS1A binding protein                                                                                                                                                                                                                                                                                         |
| 7975889 | VASH1    | 0.478 | vasohibin 1                                                                                                                                                                                                                                                                                                                  |
| 8037251 |          | 0.479 | pregnancy specific beta-1-glycoprotein 7 (gene/pseudogene)   pregnancy specific beta-1-glycoprotein 4   pregnancy specific beta-1-glycoprotein 8   pregnancy specific beta-1-glycoprotein 3   pregnancy specific beta-1-glycoprotein 1   pregnancy specific beta-1-glycoprotein 9   pregnancy specific beta-1-glycoprotein 5 |
|         | PSG7     |       |                                                                                                                                                                                                                                                                                                                              |
| 7906930 | NUF2     | 0.480 |                                                                                                                                                                                                                                                                                                                              |
| 7929078 | KIF20B   | 0.480 | kinesin family member 20B                                                                                                                                                                                                                                                                                                    |
| 7967127 | CAMKK2   | 0.480 | calcium/calmodulin-dependent protein kinase kinase 2, beta                                                                                                                                                                                                                                                                   |
| 8061471 | GINS1    | 0.481 | GINS complex subunit 1 (Psf1 homolog)                                                                                                                                                                                                                                                                                        |
| 8117018 |          | 0.482 |                                                                                                                                                                                                                                                                                                                              |
| 8075924 | MFNG     | 0.483 |                                                                                                                                                                                                                                                                                                                              |
| 7899392 | SCARNA1  | 0.483 | small Cajal body-specific RNA 1                                                                                                                                                                                                                                                                                              |
| 7923189 | KIF14    | 0.484 | kinesin family member 14                                                                                                                                                                                                                                                                                                     |
| 8026875 | SNORA68  | 0.485 | small nucleolar RNA, H/ACA box 68                                                                                                                                                                                                                                                                                            |
| 7938777 | LDHA     | 0.485 | lactate dehydrogenase A                                                                                                                                                                                                                                                                                                      |
| 7943413 | BIRC3    | 0.485 | baculoviral IAP repeat-containing 3                                                                                                                                                                                                                                                                                          |

|         |           |       |                                                                                                                                                                                                                                                                                                                                                 |
|---------|-----------|-------|-------------------------------------------------------------------------------------------------------------------------------------------------------------------------------------------------------------------------------------------------------------------------------------------------------------------------------------------------|
| 7982294 | LOC390561 | 0.486 | OTU domain containing 7A   hypothetical LOC440261                                                                                                                                                                                                                                                                                               |
| 8049317 | DGKD      | 0.487 | diacylglycerol kinase, delta 130kDa                                                                                                                                                                                                                                                                                                             |
| 8131867 |           | 0.487 |                                                                                                                                                                                                                                                                                                                                                 |
| 8042830 | MTHFD2    | 0.487 | methylenetetrahydrofolate dehydrogenase (NADP+ dependent) 2, methenyltetrahydrofolate cyclohydrolase                                                                                                                                                                                                                                            |
| 8046488 | CDCA7     | 0.487 | cell division cycle associated 7                                                                                                                                                                                                                                                                                                                |
| 8172425 | SLC38A5   | 0.487 | solute carrier family 38, member 5                                                                                                                                                                                                                                                                                                              |
| 7948894 | WDR74     | 0.488 | RNA, U2 small nuclear 1   RNA, U2 small nuclear 2   WD repeat domain 74                                                                                                                                                                                                                                                                         |
| 8155602 |           | 0.489 | ankyrin repeat domain 20 family, member A2   ankyrin repeat domain 20 family, member A3   ankyrin repeat domain 20 family, member A4   ankyrin repeat domain 20 family, member A1   coiled-coil domain containing 29   hypothetical LOC644249   similar to coiled-coil domain containing 29   ankyrin repeat domain 20B   similar to hCG1744891 |
|         | ANKRD20A2 |       |                                                                                                                                                                                                                                                                                                                                                 |
| 8109912 | KCNIP1    | 0.489 | Kv channel interacting protein 1                                                                                                                                                                                                                                                                                                                |
| 7955637 | KRT18     | 0.490 | keratin 18                                                                                                                                                                                                                                                                                                                                      |
| 8016147 | KIF18B    | 0.490 | kinesin family member 18B                                                                                                                                                                                                                                                                                                                       |
| 8126653 | MRPL14    | 0.491 | mitochondrial ribosomal protein L14                                                                                                                                                                                                                                                                                                             |
| 8166509 | FAM48B2   | 0.491 | family with sequence similarity 48, member B2   family with sequence similarity 48, member B1                                                                                                                                                                                                                                                   |
| 8171844 | FAM48B2   | 0.491 | family with sequence similarity 48, member B2   family with sequence similarity 48, member B1                                                                                                                                                                                                                                                   |
| 8014974 | TOP2A     | 0.493 | topoisomerase (DNA) II alpha 170kDa                                                                                                                                                                                                                                                                                                             |
| 7979307 | DLGAP5    | 0.494 | discs, large (Drosophila) homolog-associated protein 5                                                                                                                                                                                                                                                                                          |
| 7982792 | RAD51     | 0.496 |                                                                                                                                                                                                                                                                                                                                                 |
| 8117435 | BTN3A2    | 0.497 | butyrophilin, subfamily 3, member A2                                                                                                                                                                                                                                                                                                            |
| 8095362 | MT2A      | 0.498 | metallothionein 2A                                                                                                                                                                                                                                                                                                                              |
| 7947248 | KIF18A    | 0.498 | kinesin family member 18A                                                                                                                                                                                                                                                                                                                       |
| 7919560 |           | 0.498 |                                                                                                                                                                                                                                                                                                                                                 |
| 8122807 | AKAP12    | 0.499 | A kinase (PRKA) anchor protein 12                                                                                                                                                                                                                                                                                                               |
| 8072678 | HMOX1     | 0.499 | heme oxygenase (decycling) 1                                                                                                                                                                                                                                                                                                                    |

### Upregulated genes

| Probe ID | Gene Symbol | Fold Change<br>(BMP- | Gene Description                                                                                                                                                                                                                               |
|----------|-------------|----------------------|------------------------------------------------------------------------------------------------------------------------------------------------------------------------------------------------------------------------------------------------|
| 7898693  | ALPL        | 51.235               | alkaline phosphatase, liver/bone/kidney                                                                                                                                                                                                        |
| 7951662  | CRYAB       | 37.151               | crystallin, alpha B                                                                                                                                                                                                                            |
| 7980891  | TC2N        | 15.607               | tandem C2 domains, nuclear                                                                                                                                                                                                                     |
| 8106418  | CRHBP       | 14.860               | corticotropin releasing hormone binding protein                                                                                                                                                                                                |
| 8102986  | FREM3       | 13.592               | FRAS1 related extracellular matrix 3                                                                                                                                                                                                           |
| 7984353  | SMAD6       | 12.092               | SMAD family member 6                                                                                                                                                                                                                           |
| 8141843  | RASA4P      | 10.717               | RAS p21 protein activator 4   similar to HSPC047 protein                                                                                                                                                                                       |
| 7957126  | KCNMB4      | 10.544               | potassium large conductance calcium-activated channel, subfamily M, beta member 4                                                                                                                                                              |
| 7971077  | POSTN       | 8.861                | periostin, osteoblast specific factor                                                                                                                                                                                                          |
| 8023220  | SMAD7       | 7.663                | SMAD family member 7                                                                                                                                                                                                                           |
| 8060940  | C20orf103   | 7.509                | chromosome 20 open reading frame 103                                                                                                                                                                                                           |
| 8151457  | HEY1        | 7.328                | hairy/enhancer-of-split related with YRPW motif 1                                                                                                                                                                                              |
| 7975076  | HSPA2       | 6.955                | heat shock 70kDa protein 2                                                                                                                                                                                                                     |
| 8142765  | LRRC4       | 6.804                | leucine rich repeat containing 4                                                                                                                                                                                                               |
| 8081710  | SIDT1       | 6.468                | SID1 transmembrane family, member 1                                                                                                                                                                                                            |
| 8101429  | PLAC8       | 6.156                | placenta-specific 8                                                                                                                                                                                                                            |
| 7902565  | LPHN2       | 5.770                | latrophilin 2                                                                                                                                                                                                                                  |
| 7914075  | FCN3        | 5.724                | ficolin (collagen/fibrinogen domain containing) 3 (Hakata antigen)                                                                                                                                                                             |
| 8141803  |             | 5.701                | RAS p21 protein activator 4   RAS p21 protein activator 4 pseudogene   RAS p21 protein activator 4B   polymerase (RNA) II (DNA directed) polypeptide J4, pseudogene   similar to calcium-promoted Ras inactivator   similar to HSPC047 protein |
|          | RASA4       |                      |                                                                                                                                                                                                                                                |
| 7943803  | DIXDC1      | 5.618                | DIX domain containing 1                                                                                                                                                                                                                        |
| 7924058  | IRF6        | 5.572                | interferon regulatory factor 6                                                                                                                                                                                                                 |
| 8100026  | ATP8A1      | 5.569                | ATPase, aminophospholipid transporter (APLT), class I, type 8A, member 1                                                                                                                                                                       |
| 7976698  | EML1        | 5.544                | echinoderm microtubule associated protein like 1                                                                                                                                                                                               |
| 8078397  | CMTM8       | 5.461                | CKLF-like MARVEL transmembrane domain containing 8                                                                                                                                                                                             |
| 7899939  | GJA4        | 5.369                | gap junction protein, alpha 4, 37kDa                                                                                                                                                                                                           |
| 8085797  | THRB        | 5.368                | thyroid hormone receptor, beta (erythroblastic leukemia viral (v-erb-a) oncogene homolog 2, avian)                                                                                                                                             |
| 8059376  | SERPINE2    | 5.349                | serpin peptidase inhibitor, clade E (nexin, plasminogen activator inhibitor type 1), member 2                                                                                                                                                  |

|         |          |       |                                                                                                                                                                                                                   |
|---------|----------|-------|-------------------------------------------------------------------------------------------------------------------------------------------------------------------------------------------------------------------|
| 7915682 | ZSWIM5   | 5.288 | zinc finger, SWIM-type containing 5                                                                                                                                                                               |
| 8008627 | NOG      | 5.286 | noggin                                                                                                                                                                                                            |
| 7972297 | ABCC4    | 5.265 | ATP-binding cassette, sub-family C (CFTR/MRP), member 4                                                                                                                                                           |
| 8141768 | RASA4    | 5.226 | RAS p21 protein activator 4   RAS p21 protein activator 4 pseudogene   RAS p21 protein activator 4B   polymerase (RNA) II (DNA directed) polypeptide J4, pseudogene   similar to calcium-promoted Ras inactivator |
| 8139270 | RASA4P   | 5.153 | RAS p21 protein activator 4   RAS p21 protein activator 4 pseudogene   RAS p21 protein activator 4B   similar to calcium-promoted Ras inactivator                                                                 |
| 7922976 | PTGS2    | 5.114 | prostaglandin-endoperoxide synthase 2 (prostaglandin G/H synthase and cyclooxygenase)                                                                                                                             |
| 8087907 | SEMA3G   | 5.103 | sema domain, immunoglobulin domain (Ig), short basic domain, secreted, (semaphorin) 3G                                                                                                                            |
| 8166511 | PDK3     | 5.068 | pyruvate dehydrogenase kinase, isozyme 3                                                                                                                                                                          |
| 7964834 | CPM      | 4.856 | carboxypeptidase M                                                                                                                                                                                                |
| 8156783 | COL15A1  | 4.729 | collagen, type XV, alpha 1                                                                                                                                                                                        |
| 8080964 | GLT8D4   | 4.658 | glucoside xylosyltransferase 2   glycosyltransferase 8 domain containing 4                                                                                                                                        |
| 8088550 | PRICKLE2 | 4.574 | prickle homolog 2 (Drosophila)                                                                                                                                                                                    |
| 8121601 | FAM26E   | 4.536 | family with sequence similarity 26, member E                                                                                                                                                                      |
| 8078014 | SLC6A6   | 4.476 | solute carrier family 6 (neurotransmitter transporter, taurine), member 6                                                                                                                                         |
| 8129677 | SGK1     | 4.465 | serum/glucocorticoid regulated kinase 1                                                                                                                                                                           |
| 8146115 | C8orf4   | 4.458 | chromosome 8 open reading frame 4                                                                                                                                                                                 |
| 8101675 | ABCG2    | 4.399 | ATP-binding cassette, sub-family G (WHITE), member 2                                                                                                                                                              |
| 8157105 | ZNF462   | 4.399 | zinc finger protein 462                                                                                                                                                                                           |
| 8130674 | PDE10A   | 4.358 | phosphodiesterase 10A                                                                                                                                                                                             |
| 8091972 | MECOM    | 4.306 | MDS1 and EVI1 complex locus                                                                                                                                                                                       |
| 7916112 | RAB3B    | 4.277 |                                                                                                                                                                                                                   |
| 7933194 | CXCL12   | 4.258 | chemokine (C-X-C motif) ligand 12   chemokine (C-X-C motif) ligand 12 (stromal cell-derived                                                                                                                       |
| 7995681 | MMP2     | 4.229 | matrix metalloproteinase 2 (gelatinase A, 72kDa gelatinase, 72kDa type IV collagenase)                                                                                                                            |
| 8099326 | SLC2A9   | 4.204 | solute carrier family 2 (facilitated glucose transporter), member 9                                                                                                                                               |
| 7931832 | AKR1C2   | 4.148 | aldo-keto reductase family 1, member C2 (dihydrodiol dehydrogenase 2; bile acid binding protein; 3-alpha hydroxysteroid dehydrogenase, type III)                                                                  |
| 8104901 | IL7R     | 4.144 | interleukin 7 receptor                                                                                                                                                                                            |
| 8040103 | ID2      | 4.047 | inhibitor of DNA binding 2, dominant negative helix-loop-helix protein                                                                                                                                            |



|         |           |       |                                                                                               |
|---------|-----------|-------|-----------------------------------------------------------------------------------------------|
| 8016832 | MMD       | 3.992 | monocyte to macrophage differentiation-associated                                             |
| 7908351 | PLA2G4A   | 3.945 | phospholipase A2, group IVA (cytosolic, calcium-dependent)                                    |
| 8112615 | ENC1      | 3.916 | ectodermal-neural cortex 1 (with BTB-like domain)   ectodermal-neural cortex (with BTB-like   |
| 8118149 | LST1      | 3.888 | leukocyte specific transcript 1                                                               |
| 8177988 | LST1      | 3.888 | leukocyte specific transcript 1                                                               |
| 8179268 | LST1      | 3.888 | leukocyte specific transcript 1                                                               |
| 8140579 | CACNA2D1  | 3.772 | calcium channel, voltage-dependent, alpha 2/delta subunit 1                                   |
| 7933750 | SLC16A9   | 3.688 | solute carrier family 16, member 9 (monocarboxylic acid transporter 9)                        |
| 7983704 | GLDN      | 3.678 | gliomedin                                                                                     |
| 7962559 | SLC38A4   | 3.658 | solute carrier family 38, member 4                                                            |
| 7971015 | SMAD9     | 3.639 | SMAD family member 9                                                                          |
| 8110932 |           | 3.635 | sema domain, seven thrombospondin repeats (type 1 and type 1-like), transmembrane domain (TM) |
|         | SEMA5A    |       | and short cytoplasmic domain, (semaphorin) 5A                                                 |
| 8155547 | LOC442421 | 3.631 | hypothetical LOC442421   similar to hCG2039164                                                |
| 8100015 | BEND4     | 3.631 | BEN domain containing 4                                                                       |
| 7952046 | MPZL2     | 3.596 | myelin protein zero-like 2                                                                    |
| 8063382 | SNAI1     | 3.583 | snail homolog 1 (Drosophila)                                                                  |
| 8135734 | C7orf58   | 3.575 | chromosome 7 open reading frame 58                                                            |
| 8151768 | RUNX1T1   | 3.575 | runt-related transcription factor 1; translocated to, 1 (cyclin D-related)                    |
| 8022803 | FAM59A    | 3.575 | family with sequence similarity 59, member A                                                  |
| 7962375 | PRICKLE1  | 3.562 | prickle homolog 1 (Drosophila)                                                                |
| 8126035 | CPNE5     | 3.415 | copine V                                                                                      |
| 8160712 | SUGT1P    | 3.305 | suppressor of G2 allele of SKP1 pseudogene 1 ( <i>S. cerevisiae</i> )                         |
| 8047248 | PLCL1     | 3.303 | phospholipase C-like 1                                                                        |
| 8160521 | MOBKL2B   | 3.286 | MOB1, Mps One Binder kinase activator-like 2B (yeast)                                         |
| 7942957 | PRSS23    | 3.183 | protease, serine, 23                                                                          |
| 7902495 | NEXN      | 3.176 | nexilin (F actin binding protein)                                                             |
| 7954645 | TSPAN11   | 3.165 | tetraspanin 11                                                                                |
| 8085122 | C3orf32   | 3.161 | chromosome 3 open reading frame 32                                                            |
| 8142270 | NRCAM     | 3.156 | neuronal cell adhesion molecule                                                               |
| 8085716 | SATB1     | 3.140 | SATB homeobox 1                                                                               |

|         |               |       |                                                                                                 |
|---------|---------------|-------|-------------------------------------------------------------------------------------------------|
| 8009277 | RGS9          | 3.120 | regulator of G-protein signaling 9                                                              |
| 7926105 | GATA3         | 3.094 | GATA binding protein 3                                                                          |
| 8129804 | MAP3K5        | 3.050 | mitogen-activated protein kinase kinase kinase 5                                                |
| 7939341 | CD44          | 3.018 |                                                                                                 |
| 8143441 | KIAA1147      | 2.986 |                                                                                                 |
| 7993588 | TMC7          | 2.982 | transmembrane channel-like 7                                                                    |
| 8139207 | INHBA         | 2.928 | inhibin, beta A                                                                                 |
| 7944722 | UBASH3B       | 2.921 | ubiquitin associated and SH3 domain containing B   ubiquitin associated and SH3 domain          |
| 8092849 | ATP13A3       | 2.876 | ATPase type 13A3                                                                                |
| 8055624 | ZEB2          | 2.876 | zinc finger E-box binding homeobox 2                                                            |
| 7925062 | SIPA1L2       | 2.861 | signal-induced proliferation-associated 1 like 2                                                |
| 7908459 | CFH           | 2.836 | complement factor H                                                                             |
| 7921916 | RGS5          | 2.834 | regulator of G-protein signaling 5                                                              |
| 8046428 | RAPGEF4       | 2.792 | Rap guanine nucleotide exchange factor (GEF) 4                                                  |
| 8057677 | SLC40A1       | 2.762 | solute carrier family 40 (iron-regulated transporter), member 1                                 |
| 7933733 | FAM13C        | 2.762 | family with sequence similarity 13, member C   phytanoyl-CoA 2-hydroxylase interacting protein- |
| 7978407 | PRKD1         | 2.761 | protein kinase D1                                                                               |
| 7965226 | RASSF9        | 2.750 | Ras association (RalGDS/AF-6) domain family (N-terminal) member 9                               |
| 7967870 | RP11-484H12.6 | 2.729 |                                                                                                 |
| 7934215 | SPOCK2        | 2.712 | sparc/osteonectin, cwcv and kazal-like domains proteoglycan (testican) 2                        |
| 8086538 | LOC644714     | 2.709 |                                                                                                 |
| 7901073 | UROD          | 2.707 | uroporphyrinogen decarboxylase                                                                  |
| 8056343 | COBLL1        | 2.699 | COBL-like 1                                                                                     |
| 8028872 | LTBP4         | 2.678 | latent transforming growth factor beta binding protein 4                                        |
| 8144917 | LPL           | 2.665 | lipoprotein lipase                                                                              |
| 7963590 | CSAD          | 2.661 | cysteine sulfinic acid decarboxylase                                                            |
| 7918902 | CD58          | 2.660 |                                                                                                 |
| 8007537 | CD300LG       | 2.648 | CD300 molecule-like family member g                                                             |
| 7901993 | CACHD1        | 2.620 | cache domain containing 1                                                                       |
| 7897877 | TNFRSF1B      | 2.618 | tumor necrosis factor receptor superfamily, member 1B                                           |
| 8115543 | EBF1          | 2.608 | early B-cell factor 1                                                                           |

|         |          |       |                                                                                         |
|---------|----------|-------|-----------------------------------------------------------------------------------------|
| 7961900 | ITPR2    | 2.597 | inositol 1,4,5-triphosphate receptor, type 2                                            |
| 8103822 | VEGFC    | 2.597 | vascular endothelial growth factor C                                                    |
| 8118116 | MICB     | 2.569 | MHC class I polypeptide-related sequence B                                              |
| 7954653 |          | 2.554 | tetraspanin 11                                                                          |
| 8044462 | TTL      | 2.533 | tubulin tyrosine ligase                                                                 |
| 8007363 | WNK4     | 2.527 | WNK lysine deficient protein kinase 4                                                   |
| 7975416 | PCNX     | 2.497 | pecanex homolog (Drosophila)                                                            |
| 8170704 | ABCD1    | 2.481 | ATP-binding cassette, sub-family D (ALD), member 1                                      |
| 8117045 | RBM24    | 2.481 | RNA binding motif protein 24                                                            |
| 7904761 | ITGA10   | 2.480 | integrin, alpha 10                                                                      |
| 7961418 |          | 2.467 |                                                                                         |
| 8121794 | SMPDL3A  | 2.466 | sphingomyelin phosphodiesterase, acid-like 3A                                           |
| 7950644 | NDUFC2   | 2.464 | NADH dehydrogenase (ubiquinone) 1, subcomplex unknown, 2, 14.5kDa                       |
| 7902023 | RAVER2   | 2.462 | ribonucleoprotein, PTB-binding 2                                                        |
| 7909225 | DYRK3    | 2.458 | dual-specificity tyrosine-(Y)-phosphorylation regulated kinase 3                        |
| 7905801 | TDRD10   | 2.443 | tudor domain containing 10                                                              |
| 7989073 | PRTG     | 2.441 | protogenin homolog (Gallus gallus)                                                      |
| 8102214 | PAPSS1   | 2.437 | 3'-phosphoadenosine 5'-phosphosulfate synthase 1                                        |
| 8028084 | APLP1    | 2.423 | amyloid beta (A4) precursor-like protein 1                                              |
| 7995697 | LPCAT2   | 2.422 | lysophosphatidylcholine acyltransferase 2                                               |
| 8101757 | GPRIN3   | 2.417 | GPRIN family member 3                                                                   |
| 8083569 | TIPARP   | 2.414 | TCDD-inducible poly(ADP-ribose) polymerase                                              |
| 8114797 | SPRY4    | 2.406 | sprouty homolog 4 (Drosophila)                                                          |
| 7901460 | GPX7     | 2.404 | glutathione peroxidase 7                                                                |
| 8169580 | IL13RA1  | 2.400 | interleukin 13 receptor, alpha 1                                                        |
| 8122336 | C6orf115 | 2.394 | chromosome 6 open reading frame 115                                                     |
| 7951447 | CWF19L2  | 2.394 | CWF19-like 2, cell cycle control (S. pombe)                                             |
| 8177955 | MICB     | 2.387 | MHC class I polypeptide-related sequence B                                              |
| 8133860 | GNAI1    | 2.381 | guanine nucleotide binding protein (G protein), alpha inhibiting activity polypeptide 1 |
| 7943562 | ELMOD1   | 2.375 | ELMO/CED-12 domain containing 1                                                         |
| 8112940 | SSBP2    | 2.367 | single-stranded DNA binding protein 2                                                   |

|         |          |       |                                                                                                     |
|---------|----------|-------|-----------------------------------------------------------------------------------------------------|
| 8138067 | CYTH3    | 2.367 | cytohesin 3                                                                                         |
| 7977615 | RNASE1   | 2.364 | ribonuclease, RNase A family, 1 (pancreatic)                                                        |
| 8131069 | GPER     | 2.342 | G protein-coupled estrogen receptor 1                                                               |
| 8030002 | ZNF114   | 2.334 | zinc finger protein 114                                                                             |
| 8050160 | MBOAT2   | 2.325 | membrane bound O-acyltransferase domain containing 2                                                |
| 7926875 | BAMBI    | 2.308 | BMP and activin membrane-bound inhibitor homolog ( <i>Xenopus laevis</i> )                          |
| 8106354 | IQGAP2   | 2.308 | IQ motif containing GTPase activating protein 2                                                     |
| 8008885 | MIR21    | 2.293 | microRNA 21                                                                                         |
| 8115099 | PDGFRB   | 2.291 | platelet-derived growth factor receptor, beta polypeptide                                           |
| 8179238 | MICA     | 2.283 | MHC class I polypeptide-related sequence A                                                          |
| 7945262 | JAM3     | 2.278 | junctional adhesion molecule 3                                                                      |
| 7896929 | VWA1     | 2.268 | von Willebrand factor A domain containing 1                                                         |
| 7966690 | TBX3     | 2.264 | T-box 3                                                                                             |
| 7970763 | FLT1     | 2.251 | fms-related tyrosine kinase 1 (vascular endothelial growth factor/vascular permeability factor)     |
| 8171539 | RAI2     | 2.249 | retinoic acid induced 2                                                                             |
| 7989094 | NEDD4    | 2.237 | neural precursor cell expressed, developmentally down-regulated 4                                   |
| 8066848 | PREX1    | 2.235 | phosphatidylinositol-3,4,5-trisphosphate-dependent Rac exchange factor 1                            |
| 8057887 | STK17B   | 2.235 | serine/threonine kinase 17b                                                                         |
| 8001932 | B3GNT9   | 2.233 | UDP-GlcNAc:betaGal beta-1,3-N-acetylglucosaminyltransferase 9   chromosome 16 open reading frame 70 |
| 8027604 | KIAA0355 | 2.231 |                                                                                                     |
| 8166469 | SAT1     | 2.224 | spermidine/spermine N1-acetyltransferase 1                                                          |
| 8131600 | TSPAN13  | 2.210 | tetraspanin 13                                                                                      |
| 7987454 | BMF      | 2.206 | Bcl2 modifying factor                                                                               |
| 8138602 | DFNA5    | 2.206 | deafness, autosomal dominant 5                                                                      |
| 8117106 | RNF144B  | 2.204 | ring finger protein 144B                                                                            |
| 8093518 | FGFR3    | 2.202 | fibroblast growth factor receptor 3                                                                 |
| 8169365 | TMEM164  | 2.202 | transmembrane protein 164                                                                           |
| 8133876 | CD36     | 2.200 |                                                                                                     |
| 8121605 | FAM26D   | 2.194 | family with sequence similarity 26, member D                                                        |
| 8085033 | LMLN     | 2.193 | leishmanolysin-like (metallopeptidase M8 family)                                                    |

|         |           |       |                                                                                                                        |
|---------|-----------|-------|------------------------------------------------------------------------------------------------------------------------|
| 7932985 | NRP1      | 2.189 | neuropilin 1                                                                                                           |
| 8107307 | CAMK4     | 2.178 | calcium/calmodulin-dependent protein kinase IV                                                                         |
| 8051028 |           | 2.178 |                                                                                                                        |
| 7969339 |           | 2.173 |                                                                                                                        |
| 7962151 | DENND5B   | 2.167 | DENN/MADD domain containing 5B                                                                                         |
| 8138231 | THSD7A    | 2.161 | thrombospondin, type I, domain containing 7A                                                                           |
| 8122279 | KIAA1244  | 2.159 | KIAA1244   hypothetical protein LOC202451                                                                              |
| 7907370 | DNM3      | 2.157 | dynammin 3                                                                                                             |
| 7912157 | ERRFI1    | 2.156 | ERBB receptor feedback inhibitor 1                                                                                     |
| 8117079 | LOC644714 | 2.155 |                                                                                                                        |
| 7924107 | LPGAT1    | 2.145 | lysophosphatidylglycerol acyltransferase 1                                                                             |
| 8176193 | F8        | 2.145 | coagulation factor VIII, procoagulant component                                                                        |
| 8159086 | ADAMTSL2  | 2.144 | ADAMTS-like 2                                                                                                          |
| 7980744 | RPS6KA5   | 2.136 | ribosomal protein S6 kinase, 90kDa, polypeptide 5                                                                      |
| 7905606 | NPR1      | 2.135 | natriuretic peptide receptor A/guanylate cyclase A (atriuretic peptide receptor A)                                     |
| 8150537 | SLC20A2   | 2.134 | solute carrier family 20 (phosphate transporter), member 2                                                             |
| 8146462 | SOX17     | 2.132 | SRY (sex determining region Y)-box 17                                                                                  |
| 7949412 | LTBP3     | 2.126 | latent transforming growth factor beta binding protein 3                                                               |
| 7915787 | PIK3R3    | 2.125 | phosphoinositide-3-kinase, regulatory subunit 3 (gamma)                                                                |
| 8009755 | ARMC7     | 2.124 | armadillo repeat containing 7                                                                                          |
| 8077490 | LMCD1     | 2.123 | LIM and cysteine-rich domains 1                                                                                        |
| 8095299 |           | 2.123 |                                                                                                                        |
| 8164269 | ENG       | 2.110 | endoglin                                                                                                               |
| 8102789 | TERF1     | 2.105 | telomeric repeat binding factor (NIMA-interacting) 1   similar to telomeric repeat binding factor (NIMA-interacting) 1 |
| 8146914 | TERF1     | 2.105 | telomeric repeat binding factor (NIMA-interacting) 1                                                                   |
| 7953765 | RIMKLB    | 2.102 | ribosomal modification protein rimK-like family member B                                                               |
| 8142997 | PLXNA4    | 2.101 | plexin A4                                                                                                              |
| 7947462 | ABTB2     | 2.096 | ankyrin repeat and BTB (POZ) domain containing 2                                                                       |
| 8111101 | ANKH      | 2.094 | ankylosis, progressive homolog (mouse)                                                                                 |
| 7897737 | C1orf187  | 2.091 | chromosome 1 open reading frame 187                                                                                    |

|         |           |       |                                                                                                                                          |
|---------|-----------|-------|------------------------------------------------------------------------------------------------------------------------------------------|
| 8091260 | SLC9A9    | 2.088 | solute carrier family 9 (sodium/hydrogen exchanger), member 9                                                                            |
| 8164006 |           | 2.088 |                                                                                                                                          |
| 8121784 | FABP7     | 2.083 | fatty acid binding protein 7, brain                                                                                                      |
| 8045674 | LYPD6     | 2.078 | LY6/PLAUR domain containing 6                                                                                                            |
| 7981538 | JAG2      | 2.073 | jagged 2                                                                                                                                 |
| 8072360 | TCN2      | 2.071 | transcobalamin II   transcobalamin II; macrocytic anemia                                                                                 |
| 7930454 | PDCD4     | 2.062 | programmed cell death 4 (neoplastic transformation inhibitor)                                                                            |
| 8046646 | OSBPL6    | 2.061 | oxysterol binding protein-like 6                                                                                                         |
| 7997453 | PLCG2     | 2.057 | phospholipase C, gamma 2 (phosphatidylinositol-specific)                                                                                 |
| 8055688 | RND3      | 2.056 | Rho family GTPase 3                                                                                                                      |
| 8118100 | MICA      | 2.055 | MHC class I polypeptide-related sequence A                                                                                               |
| 8040742 | MAPRE3    | 2.050 | microtubule-associated protein, RP/EB family, member 3                                                                                   |
| 8144758 | ZDHHC2    | 2.050 | zinc finger, DHHC-type containing 2                                                                                                      |
| 8130422 | CNKSR3    | 2.040 | CNKSR family member 3                                                                                                                    |
| 7990033 | TLE3      | 2.035 | transducin-like enhancer of split 3 (E(sp1) homolog, Drosophila)                                                                         |
| 8170648 | BGN       | 2.033 | biglycan                                                                                                                                 |
| 7918533 | ADORA3    | 2.032 | adenosine A3 receptor                                                                                                                    |
| 7950743 | RAB30     | 2.032 |                                                                                                                                          |
| 7982564 | SPRED1    | 2.021 | sprouty-related, EVH1 domain containing 1                                                                                                |
| 8155930 | GCNT1     | 2.018 | glucosaminyl (N-acetyl) transferase 1, core 2   glucosaminyl (N-acetyl) transferase 1, core 2 (beta-1,6-N-acetylglucosaminyltransferase) |
| 7972713 | EFNB2     | 2.013 | ephrin-B2                                                                                                                                |
| 7919637 | HIST2H2BE | 2.013 | histone cluster 2, H2be                                                                                                                  |
| 7938100 | SMPD1     | 2.009 | sphingomyelin phosphodiesterase 1, acid lysosomal                                                                                        |
| 8043995 | IL1R1     | 2.007 | interleukin 1 receptor, type I                                                                                                           |
| 8124166 | MBOAT1    | 2.003 | membrane bound O-acyltransferase domain containing 1                                                                                     |

**Table S3. Top 5 annotation clusters of enriched GO terms for the genes in Table S1, related to Figure 4.**

**(1) Upregulated genes by BMP-9 treatment (4hr)**

| Cluster                                           | Enrichment Score | Terms                                                                               | Fold Enrichment |
|---------------------------------------------------|------------------|-------------------------------------------------------------------------------------|-----------------|
| Annotation Cluster 1<br>(Vasculature development) | 3.264            | GO:0001944~vasculature development                                                  | 7.699           |
|                                                   |                  | GO:0001568~blood vessel development                                                 | 7.099           |
|                                                   |                  | GO:0048514~blood vessel morphogenesis                                               | 4.580           |
|                                                   |                  | GO:0007507~heart development                                                        | 4.494           |
| Annotation Cluster 2<br>(Zinc ion binding)        | 2.047            | metal-binding                                                                       | 1.991           |
|                                                   |                  | zinc                                                                                | 2.028           |
|                                                   |                  | GO:0008270~zinc ion binding                                                         | 1.766           |
|                                                   |                  | zinc-finger                                                                         | 1.969           |
|                                                   |                  | GO:0046914~transition metal ion binding                                             | 1.598           |
|                                                   |                  | GO:0046872~metal ion binding                                                        | 1.389           |
|                                                   |                  | GO:0043169~cation binding                                                           | 1.376           |
| GO:0043167~ion binding                            | 1.356            |                                                                                     |                 |
| Annotation Cluster 3<br>(BMP signaling)           | 1.849            | IPR017855:SMAD domain-like                                                          | 52.886          |
|                                                   |                  | GO:0030509~BMP signaling pathway                                                    | 21.961          |
|                                                   |                  | GO:0007178~transmembrane receptor protein serine/threonine kinase signaling pathway | 11.258          |
|                                                   |                  | PIRSF037286:Smad protein                                                            | 129.000         |
|                                                   |                  | hsa04350:TGF-beta signaling pathway                                                 | 10.314          |
|                                                   |                  | GO:0007167~enzyme linked receptor protein signaling pathway                         | 5.086           |
|                                                   |                  | domain:MH2                                                                          | 78.762          |
|                                                   |                  | domain:MH1                                                                          | 78.762          |
|                                                   |                  | IPR013019:MAD homology, MH1                                                         | 74.371          |
|                                                   |                  | IPR013790:Dwarfin                                                                   | 74.371          |
|                                                   |                  | IPR001132:SMAD domain, Dwarfin-type                                                 | 74.371          |
|                                                   |                  | SM00524:DWB                                                                         | 54.042          |
|                                                   |                  | GO:0005072~transforming growth factor beta receptor, cytoplasmic mediator activity  | 50.583          |

|                                 |       |                                                                       |        |
|---------------------------------|-------|-----------------------------------------------------------------------|--------|
|                                 |       | IPR003619:MAD homology 1, Dwarfing-type                               | 49.580 |
|                                 |       | SM00523:DWA                                                           | 36.028 |
|                                 |       | GO:0007179~transforming growth factor beta receptor signaling pathway | 12.884 |
|                                 |       | GO:0030514~negative regulation of BMP signaling pathway               | 27.608 |
|                                 |       | GO:0030510~regulation of BMP signaling pathway                        | 19.326 |
|                                 |       | GO:0046332~SMAD binding                                               | 12.096 |
|                                 |       | GO:0051100~negative regulation of binding                             | 9.827  |
|                                 |       | GO:0010648~negative regulation of cell communication                  | 3.896  |
|                                 |       | GO:0007389~pattern specification process                              | 3.619  |
|                                 |       | h_alkPathway:ALK in cardiac myocytes                                  | 7.044  |
|                                 |       | GO:0007166~cell surface receptor linked signal transduction           | 1.562  |
|                                 |       | GO:0009968~negative regulation of signal transduction                 | 3.498  |
|                                 |       | GO:0051098~regulation of binding                                      | 3.789  |
|                                 |       | GO:0044092~negative regulation of molecular function                  | 2.314  |
|                                 |       | GO:0005667~transcription factor complex                               | 3.043  |
|                                 |       | GO:0042802~identical protein binding                                  | 1.739  |
|                                 |       | GO:0042803~protein homodimerization activity                          | 2.221  |
|                                 |       | GO:0046983~protein dimerization activity                              | 1.369  |
|                                 |       | GO:0043233~organelle lumen                                            | 1.053  |
|                                 |       | GO:0031974~membrane-enclosed lumen                                    | 1.033  |
|                                 |       | GO:0031981~nuclear lumen                                              | 1.028  |
|                                 |       | GO:0070013~intracellular organelle lumen                              | 0.958  |
|                                 |       | GO:0044451~nucleoplasm part                                           | 1.152  |
|                                 |       | GO:0005730~nucleolus                                                  | 0.916  |
|                                 |       | GO:0005654~nucleoplasm                                                | 0.725  |
| Annotation Cluster 4            | 1.768 | GO:0010033~response to organic substance                              | 3.216  |
| (Response to organic substance) |       | GO:0009719~response to endogenous stimulus                            | 3.817  |
|                                 |       | GO:0009725~response to hormone stimulus                               | 3.686  |
|                                 |       | GO:0043627~response to estrogen stimulus                              | 7.362  |
|                                 |       | GO:0048545~response to steroid hormone stimulus                       | 5.033  |
|                                 |       | metalloprotein                                                        | 5.114  |



|                        |       |                                                         |       |
|------------------------|-------|---------------------------------------------------------|-------|
|                        |       | GO:0010035~response to inorganic substance              | 2.828 |
| Annotation Cluster 5   | 1.710 | GO:0045597~positive regulation of cell differentiation  | 5.064 |
| (Cell differentiation) |       | GO:0051094~positive regulation of developmental process | 4.171 |
|                        |       | hsa04060:Cytokine-cytokine receptor interaction         | 2.854 |

**(2) Downregulated genes by BMP-9 treatment (4hr)**

| Cluster                      | Enrichment Score | Terms                                                              | Fold Enrichment |
|------------------------------|------------------|--------------------------------------------------------------------|-----------------|
| Annotation Cluster 1         | 2.199            | GO:0051050~positive regulation of transport                        | 8.493           |
| (Development, proliferation) |                  | GO:0051240~positive regulation of multicellular organismal process | 7.762           |
|                              |                  | GO:0051094~positive regulation of developmental process            | 6.813           |
|                              |                  | GO:0009991~response to extracellular stimulus                      | 7.379           |
|                              |                  | GO:0051222~positive regulation of protein transport                | 16.153          |
|                              |                  | GO:0001817~regulation of cytokine production                       | 7.474           |
|                              |                  | GO:0008283~cell proliferation                                      | 4.344           |
|                              |                  | GO:0050707~regulation of cytokine secretion                        | 27.056          |
|                              |                  | GO:0051223~regulation of protein transport                         | 9.493           |
|                              |                  | GO:0070201~regulation of establishment of protein localization     | 8.944           |
|                              |                  | GO:0050714~positive regulation of protein secretion                | 19.797          |
|                              |                  | GO:0032880~regulation of protein localization                      | 7.842           |
|                              |                  | GO:0050708~regulation of protein secretion                         | 13.994          |
|                              |                  | GO:0009967~positive regulation of signal transduction              | 4.586           |
|                              |                  | GO:0010647~positive regulation of cell communication               | 4.112           |
|                              |                  | GO:0051047~positive regulation of secretion                        | 7.447           |
|                              |                  | GO:0060341~regulation of cellular localization                     | 4.364           |
|                              |                  | GO:0051046~regulation of secretion                                 | 4.018           |
| Annotation Cluster 2         | 1.957            | GO:0007507~heart development                                       | 8.809           |
| (Vasculature development)    |                  | GO:0008285~negative regulation of cell proliferation               | 5.246           |
|                              |                  | GO:0001568~blood vessel development                                | 6.626           |
|                              |                  | GO:0001944~vasculature development                                 | 6.468           |
|                              |                  | GO:0048514~blood vessel morphogenesis                              | 6.411           |
|                              |                  | GO:0014706~striated muscle tissue development                      | 9.094           |

|                                         |       |                                                                      |        |
|-----------------------------------------|-------|----------------------------------------------------------------------|--------|
|                                         |       | GO:0060537~muscle tissue development                                 | 8.658  |
|                                         |       | GO:0048738~cardiac muscle tissue development                         | 14.240 |
|                                         |       | GO:0048729~tissue morphogenesis                                      | 6.012  |
|                                         |       | GO:0043009~chordate embryonic development                            | 4.087  |
|                                         |       | GO:0009792~embryonic development ending in birth or egg hatching     | 4.050  |
|                                         |       | GO:0060284~regulation of cell development                            | 5.279  |
|                                         |       | GO:0007517~muscle organ development                                  | 5.129  |
|                                         |       | GO:0001525~angiogenesis                                              | 5.484  |
|                                         |       | developmental protein                                                | 2.390  |
| Annotation Cluster 3<br>(Miscellaneous) | 1.834 | GO:0007005~mitochondrion organization                                | 11.763 |
|                                         |       | GO:0051050~positive regulation of transport                          | 8.493  |
|                                         |       | GO:0051240~positive regulation of multicellular organismal process   | 7.762  |
|                                         |       | GO:0048872~homeostasis of number of cells                            | 13.528 |
|                                         |       | GO:0051094~positive regulation of developmental process              | 6.813  |
|                                         |       | GO:0046902~regulation of mitochondrial membrane permeability         | 73.789 |
|                                         |       | GO:0043066~negative regulation of apoptosis                          | 5.350  |
|                                         |       | GO:0043069~negative regulation of programmed cell death              | 5.276  |
|                                         |       | GO:0060548~negative regulation of cell death                         | 5.261  |
|                                         |       | GO:0010941~regulation of cell death                                  | 3.320  |
|                                         |       | GO:0010524~positive regulation of calcium ion transport into cytosol | 40.584 |
|                                         |       | GO:0001912~positive regulation of leukocyte mediated cytotoxicity    | 38.651 |
|                                         |       | GO:0043029~T cell homeostasis                                        | 38.651 |
|                                         |       | GO:0051241~negative regulation of multicellular organismal process   | 8.249  |
|                                         |       | GO:0031343~positive regulation of cell killing                       | 33.820 |
|                                         |       | GO:0001910~regulation of leukocyte mediated cytotoxicity             | 32.467 |
|                                         |       | GO:0001817~regulation of cytokine production                         | 7.474  |
|                                         |       | GO:0001819~positive regulation of cytokine production                | 12.025 |
|                                         |       | GO:0045428~regulation of nitric oxide biosynthetic process           | 30.062 |
|                                         |       | GO:0031341~regulation of cell killing                                | 28.989 |
|                                         |       | GO:0002260~lymphocyte homeostasis                                    | 28.989 |
|                                         |       | GO:0030099~myeloid cell differentiation                              | 11.637 |

|                                                                                                                                                             |        |
|-------------------------------------------------------------------------------------------------------------------------------------------------------------|--------|
| GO:0010522~regulation of calcium ion transport into cytosol                                                                                                 | 27.989 |
| GO:0042592~homeostatic process                                                                                                                              | 3.242  |
| GO:0002824~positive regulation of adaptive immune response based on somatic recombination of immune receptors built from immunoglobulin superfamily domains | 27.056 |
| GO:0002821~positive regulation of adaptive immune response                                                                                                  | 26.183 |
| GO:0002697~regulation of immune effector process                                                                                                            | 10.715 |
| GO:0007006~mitochondrial membrane organization                                                                                                              | 25.365 |
| GO:0051928~positive regulation of calcium ion transport                                                                                                     | 24.596 |
| GO:0002705~positive regulation of leukocyte mediated immunity                                                                                               | 23.873 |
| GO:0002708~positive regulation of lymphocyte mediated immunity                                                                                              | 23.873 |
| GO:0001776~leukocyte homeostasis                                                                                                                            | 22.547 |
| GO:0042981~regulation of apoptosis                                                                                                                          | 3.029  |
| GO:0032844~regulation of homeostatic process                                                                                                                | 9.493  |
| GO:0043067~regulation of programmed cell death                                                                                                              | 2.999  |
| GO:0032846~positive regulation of homeostatic process                                                                                                       | 20.292 |
| GO:0045597~positive regulation of cell differentiation                                                                                                      | 5.907  |
| GO:0002700~regulation of production of molecular mediator of immune response                                                                                | 19.797 |
| GO:0048878~chemical homeostasis                                                                                                                             | 3.699  |
| GO:0043270~positive regulation of ion transport                                                                                                             | 19.326 |
| GO:0009628~response to abiotic stimulus                                                                                                                     | 4.411  |
| GO:0042110~T cell activation                                                                                                                                | 8.589  |
| GO:0002699~positive regulation of immune effector process                                                                                                   | 18.447 |
| GO:0006873~cellular ion homeostasis                                                                                                                         | 4.341  |
| GO:0055082~cellular chemical homeostasis                                                                                                                    | 4.272  |
| GO:0016044~membrane organization                                                                                                                            | 4.261  |
| GO:0042391~regulation of membrane potential                                                                                                                 | 8.076  |
| GO:0010033~response to organic substance                                                                                                                    | 3.002  |
| GO:0050801~ion homeostasis                                                                                                                                  | 3.969  |
| GO:0002706~regulation of lymphocyte mediated immunity                                                                                                       | 15.031 |

|                                                                                                                                                    |        |
|----------------------------------------------------------------------------------------------------------------------------------------------------|--------|
| GO:0002822~regulation of adaptive immune response based on somatic recombination of immune receptors built from immunoglobulin superfamily domains | 14.758 |
| GO:0002819~regulation of adaptive immune response                                                                                                  | 14.494 |
| GO:0002703~regulation of leukocyte mediated immunity                                                                                               | 13.306 |
| GO:0006839~mitochondrial transport                                                                                                                 | 11.763 |
| GO:0051924~regulation of calcium ion transport                                                                                                     | 11.763 |
| GO:0019725~cellular homeostasis                                                                                                                    | 3.484  |
| GO:0010959~regulation of metal ion transport                                                                                                       | 10.021 |
| GO:0046649~lymphocyte activation                                                                                                                   | 5.438  |
| GO:0048871~multicellular organismal homeostasis                                                                                                    | 9.549  |
| GO:0006916~anti-apoptosis                                                                                                                          | 5.254  |
| GO:0051172~negative regulation of nitrogen compound metabolic process                                                                              | 3.128  |
| GO:0008219~cell death                                                                                                                              | 2.634  |
| GO:0016265~death                                                                                                                                   | 2.616  |
| GO:0043269~regulation of ion transport                                                                                                             | 8.199  |
| GO:0031327~negative regulation of cellular biosynthetic process                                                                                    | 2.894  |
| GO:0030097~hemopoiesis                                                                                                                             | 4.586  |
| GO:0009890~negative regulation of biosynthetic process                                                                                             | 2.833  |
| GO:0045321~leukocyte activation                                                                                                                    | 4.472  |
| GO:0006915~apoptosis                                                                                                                               | 2.697  |
| GO:0048534~hemopoietic or lymphoid organ development                                                                                               | 4.162  |
| GO:0012501~programmed cell death                                                                                                                   | 2.657  |
| GO:0010942~positive regulation of cell death                                                                                                       | 3.110  |
| GO:0002520~immune system development                                                                                                               | 3.921  |
| GO:0001775~cell activation                                                                                                                         | 3.771  |
| GO:0050778~positive regulation of immune response                                                                                                  | 5.598  |
| GO:0030005~cellular di-, tri-valent inorganic cation homeostasis                                                                                   | 3.576  |
| GO:0043065~positive regulation of apoptosis                                                                                                        | 2.517  |
| GO:0043068~positive regulation of programmed cell death                                                                                            | 2.499  |
| GO:0048584~positive regulation of response to stimulus                                                                                             | 3.439  |

|                                                        |       |                                                                       |        |
|--------------------------------------------------------|-------|-----------------------------------------------------------------------|--------|
|                                                        |       | GO:0002684~positive regulation of immune system process               | 3.410  |
|                                                        |       | GO:0055066~di-, tri-valent inorganic cation homeostasis               | 3.396  |
|                                                        |       | GO:0030003~cellular cation homeostasis                                | 3.196  |
|                                                        |       | GO:0055080~cation homeostasis                                         | 2.838  |
|                                                        |       | GO:0046907~intracellular transport                                    | 1.647  |
|                                                        |       | GO:0031090~organelle membrane                                         | 1.388  |
|                                                        |       | GO:0031967~organelle envelope                                         | 1.473  |
|                                                        |       | GO:0031975~envelope                                                   | 1.468  |
| Annotation Cluster 4<br>(Response to hormone stimulus) | 1.787 | GO:0009725~response to hormone stimulus                               | 4.423  |
|                                                        |       | GO:0010033~response to organic substance                              | 3.002  |
|                                                        |       | GO:0009719~response to endogenous stimulus                            | 4.008  |
|                                                        |       | GO:0043434~response to peptide hormone stimulus                       | 7.028  |
|                                                        |       | GO:0040007~growth                                                     | 5.914  |
| Annotation Cluster 5<br>(Miscellaneous)                | 1.670 | GO:0042127~regulation of cell proliferation                           | 4.125  |
|                                                        |       | GO:0007507~heart development                                          | 8.809  |
|                                                        |       | GO:0051240~positive regulation of multicellular organismal process    | 7.762  |
|                                                        |       | GO:0051094~positive regulation of developmental process               | 6.813  |
|                                                        |       | GO:0009612~response to mechanical stimulus                            | 19.326 |
|                                                        |       | GO:0009991~response to extracellular stimulus                         | 7.379  |
|                                                        |       | compositionally biased region:Poly-Gln                                | 10.208 |
|                                                        |       | GO:0032583~regulation of gene-specific transcription                  | 10.096 |
|                                                        |       | GO:0008285~negative regulation of cell proliferation                  | 5.246  |
|                                                        |       | GO:0008284~positive regulation of cell proliferation                  | 4.575  |
|                                                        |       | GO:0051252~regulation of RNA metabolic process                        | 2.238  |
|                                                        |       | GO:0030528~transcription regulator activity                           | 2.375  |
|                                                        |       | GO:0031667~response to nutrient levels                                | 6.867  |
|                                                        |       | GO:0032526~response to retinoic acid                                  | 24.596 |
|                                                        |       | GO:0045893~positive regulation of transcription, DNA-dependent        | 3.970  |
|                                                        |       | GO:0051254~positive regulation of RNA metabolic process               | 3.937  |
|                                                        |       | GO:0051173~positive regulation of nitrogen compound metabolic process | 3.361  |
|                                                        |       | GO:0010629~negative regulation of gene expression                     | 3.758  |

|                                                                                                         |        |
|---------------------------------------------------------------------------------------------------------|--------|
| GO:0045597~positive regulation of cell differentiation                                                  | 5.907  |
| GO:0033189~response to vitamin A                                                                        | 19.326 |
| GO:0031328~positive regulation of cellular biosynthetic process                                         | 3.160  |
| GO:0009891~positive regulation of biosynthetic process                                                  | 3.114  |
| GO:0045941~positive regulation of transcription                                                         | 3.358  |
| GO:0010628~positive regulation of gene expression                                                       | 3.260  |
| GO:0003700~transcription factor activity                                                                | 2.550  |
| GO:0009967~positive regulation of signal transduction                                                   | 4.586  |
| GO:0006355~regulation of transcription, DNA-dependent                                                   | 1.984  |
| GO:0033273~response to vitamin                                                                          | 12.298 |
| GO:0045935~positive regulation of nucleobase, nucleoside, nucleotide and nucleic acid metabolic process | 3.035  |
| GO:0048729~tissue morphogenesis                                                                         | 6.012  |
| GO:0001501~skeletal system development                                                                  | 4.241  |
| GO:0010557~positive regulation of macromolecule biosynthetic process                                    | 2.896  |
| GO:0010647~positive regulation of cell communication                                                    | 4.112  |
| GO:0010604~positive regulation of macromolecule metabolic process                                       | 2.526  |
| Proto-oncogene                                                                                          | 5.396  |
| GO:0060284~regulation of cell development                                                               | 5.279  |
| GO:0043193~positive regulation of gene-specific transcription                                           | 9.330  |
| hsa04350:TGF-beta signaling pathway                                                                     | 8.350  |
| GO:0035295~tube development                                                                             | 4.919  |
| GO:0006357~regulation of transcription from RNA polymerase II promoter                                  | 2.605  |
| GO:0001822~kidney development                                                                           | 8.455  |
| GO:0010605~negative regulation of macromolecule metabolic process                                       | 2.580  |
| GO:0030324~lung development                                                                             | 8.199  |
| GO:0002009~morphogenesis of an epithelium                                                               | 8.036  |
| GO:0030323~respiratory tube development                                                                 | 7.958  |
| GO:0060541~respiratory system development                                                               | 7.516  |
| GO:0001655~urogenital system development                                                                | 7.379  |
| GO:0043565~sequence-specific DNA binding                                                                | 2.730  |

|                                                                        |       |
|------------------------------------------------------------------------|-------|
| GO:0007267~cell-cell signaling                                         | 2.706 |
| dna-binding                                                            | 1.827 |
| GO:0045449~regulation of transcription                                 | 1.560 |
| GO:0045165~cell fate commitment                                        | 5.839 |
| GO:0007584~response to nutrient                                        | 5.798 |
| developmental protein                                                  | 2.390 |
| GO:0051726~regulation of cell cycle                                    | 3.270 |
| GO:0045944~positive regulation of transcription from RNA polymerase II |       |
| promoter                                                               | 2.917 |
| GO:0003677~DNA binding                                                 | 1.422 |
| GO:0060429~epithelium development                                      | 3.576 |
| GO:0007423~sensory organ development                                   | 3.544 |
| nucleus                                                                | 1.231 |
| GO:0048598~embryonic morphogenesis                                     | 2.644 |
| transcription regulation                                               | 1.072 |
| Transcription                                                          | 0.899 |
| GO:0006350~transcription                                               | 0.773 |

---

**Table S4. Top 5 annotation clusters of enriched GO terms for the genes in Table S2, related to Figure 4.**

**(1) Upregulated genes by BMP-9 treatment (24hr)**

| Cluster                                                | Enrichment Score | Terms                                              | Fold Enrichment |
|--------------------------------------------------------|------------------|----------------------------------------------------|-----------------|
| Annotation Cluster 1<br>(Glycoproteins (cell surface)) | 5.035            | glycosylation site:N-linked (GlcNAc...)            | 1.852           |
|                                                        |                  | glycoprotein                                       | 1.803           |
|                                                        |                  | signal                                             | 1.860           |
|                                                        |                  | signal peptide                                     | 1.848           |
|                                                        |                  | disulfide bond                                     | 1.754           |
|                                                        |                  | GO:0044421~extracellular region part               | 2.405           |
|                                                        |                  | disulfide bond                                     | 1.711           |
|                                                        |                  | GO:0005615~extracellular space                     | 2.167           |
|                                                        |                  | GO:0005576~extracellular region                    | 1.559           |
|                                                        |                  | Secreted                                           | 1.681           |
| Annotation Cluster 2<br>(Growth factor binding)        | 3.140            | GO:0019838~growth factor binding                   | 6.465           |
|                                                        |                  | GO:0019955~cytokine binding                        | 6.228           |
|                                                        |                  | GO:0050431~transforming growth factor beta binding | 25.457          |
| Annotation Cluster 3<br>(Plasma membrane)              | 2.782            | GO:0005886~plasma membrane                         | 1.528           |
|                                                        |                  | membrane                                           | 1.362           |
|                                                        |                  | topological domain:Extracellular                   | 1.640           |
|                                                        |                  | GO:0005887~integral to plasma membrane             | 1.944           |
|                                                        |                  | GO:0044459~plasma membrane part                    | 1.610           |
|                                                        |                  | GO:0031226~intrinsic to plasma membrane            | 1.900           |
|                                                        |                  | transmembrane                                      | 1.381           |
|                                                        |                  | transmembrane region                               | 1.371           |
|                                                        |                  | topological domain:Cytoplasmic                     | 1.430           |
|                                                        |                  | transmembrane protein                              | 2.140           |
| Annotation Cluster 4<br>(Glycosaminoglycan binding)    | 2.108            | GO:0005539~glycosaminoglycan binding               | 4.849           |
|                                                        |                  | GO:0030247~polysaccharide binding                  | 4.408           |



|                           |       |                                                                  |        |
|---------------------------|-------|------------------------------------------------------------------|--------|
|                           |       | GO:0001871~pattern binding                                       | 4.408  |
|                           |       | GO:0030246~carbohydrate binding                                  | 2.637  |
|                           |       | heparin-binding                                                  | 5.637  |
|                           |       | GO:0008201~heparin binding                                       | 3.295  |
| Annotation Cluster 5      | 2.101 | GO:0001944~vasculature development                               | 5.656  |
| (Vasculature development) |       | GO:0001568~blood vessel development                              | 5.453  |
|                           |       | GO:0048514~blood vessel morphogenesis                            | 4.749  |
|                           |       | GO:0001569~patterning of blood vessels                           | 19.882 |
|                           |       | GO:0048754~branching morphogenesis of a tube                     | 8.993  |
|                           |       | GO:0001763~morphogenesis of a branching structure                | 7.899  |
|                           |       | GO:0035239~tube morphogenesis                                    | 5.260  |
|                           |       | GO:0001525~angiogenesis                                          | 4.514  |
|                           |       | GO:0035295~tube development                                      | 3.416  |
|                           |       | GO:0007389~pattern specification process                         | 2.815  |
|                           |       | GO:0016477~cell migration                                        | 2.723  |
|                           |       | GO:0006928~cell motion                                           | 2.110  |
|                           |       | GO:0051674~localization of cell                                  | 2.448  |
|                           |       | GO:0048870~cell motility                                         | 2.448  |
|                           |       | GO:0031175~neuron projection development                         | 2.610  |
|                           |       | hsa04360:Axon guidance                                           | 2.994  |
|                           |       | GO:0000902~cell morphogenesis                                    | 2.111  |
|                           |       | GO:0030030~cell projection organization                          | 2.042  |
|                           |       | GO:0030182~neuron differentiation                                | 1.907  |
|                           |       | GO:0032989~cellular component morphogenesis                      | 1.893  |
|                           |       | GO:0048666~neuron development                                    | 1.971  |
|                           |       | GO:0007411~axon guidance                                         | 3.122  |
|                           |       | GO:0000904~cell morphogenesis involved in differentiation        | 2.053  |
|                           |       | GO:0007409~axonogenesis                                          | 2.163  |
|                           |       | GO:0048667~cell morphogenesis involved in neuron differentiation | 1.998  |
|                           |       | GO:0048812~neuron projection morphogenesis                       | 1.960  |
|                           |       | GO:0048858~cell projection morphogenesis                         | 1.704  |

GO:0032990~cell part morphogenesis

1.631

**(2) Downregulated genes by BMP-9 treatment (24hr)**

| Cluster                                | Enrichment Score | Terms                                                   | Fold Enrichment |
|----------------------------------------|------------------|---------------------------------------------------------|-----------------|
| Annotation Cluster 1<br>(Cytoskeleton) | 3.737            | GO:0005856~cytoskeleton                                 | 2.297           |
|                                        |                  | cytoskeleton                                            | 3.265           |
|                                        |                  | GO:0043228~non-membrane-bounded organelle               | 1.703           |
|                                        |                  | GO:0043232~intracellular non-membrane-bounded organelle | 1.703           |
|                                        |                  | GO:0044430~cytoskeletal part                            | 2.221           |
| Annotation Cluster 2<br>(Cell death)   | 3.711            | cytoplasm                                               | 1.410           |
|                                        |                  | GO:0043067~regulation of programmed cell death          | 2.675           |
|                                        |                  | GO:0010941~regulation of cell death                     | 2.665           |
|                                        |                  | GO:0043069~negative regulation of programmed cell death | 3.851           |
|                                        |                  | GO:0060548~negative regulation of cell death            | 3.840           |
|                                        |                  | GO:0042981~regulation of apoptosis                      | 2.579           |
|                                        |                  | GO:0043066~negative regulation of apoptosis             | 3.626           |
| Annotation Cluster 3<br>(Cell cycle)   | 3.046            | GO:0006916~anti-apoptosis                               | 3.355           |
|                                        |                  | GO:0000279~M phase                                      | 4.802           |
|                                        |                  | GO:0022403~cell cycle phase                             | 3.816           |
|                                        |                  | cytoskeleton                                            | 3.265           |
|                                        |                  | GO:0005819~spindle                                      | 6.538           |
|                                        |                  | GO:0022402~cell cycle process                           | 3.146           |
|                                        |                  | GO:0000280~nuclear division                             | 4.937           |
|                                        |                  | GO:0007067~mitosis                                      | 4.937           |
|                                        |                  | GO:0000087~M phase of mitotic cell cycle                | 4.849           |
|                                        |                  | GO:0007049~cell cycle                                   | 2.672           |
|                                        |                  | GO:0048285~organelle fission                            | 4.743           |
|                                        |                  | GO:0015630~microtubule cytoskeleton                     | 2.976           |
|                                        |                  | GO:0000278~mitotic cell cycle                           | 3.469           |
|                                        |                  | GO:0005813~centrosome                                   | 4.290           |
| GO:0044430~cytoskeletal part           | 2.221            |                                                         |                 |

|                                         |       |                                                     |        |
|-----------------------------------------|-------|-----------------------------------------------------|--------|
|                                         |       | GO:0051301~cell division                            | 3.682  |
|                                         |       | cell cycle                                          | 3.082  |
|                                         |       | GO:0005815~microtubule organizing center            | 3.799  |
|                                         |       | GO:0007059~chromosome segregation                   | 7.314  |
|                                         |       | mitosis                                             | 4.778  |
|                                         |       | GO:0000793~condensed chromosome                     | 5.215  |
|                                         |       | cell division                                       | 3.726  |
|                                         |       | GO:0000779~condensed chromosome, centromeric region | 7.281  |
|                                         |       | GO:0000775~chromosome, centromeric region           | 4.650  |
|                                         |       | kinetochore                                         | 6.939  |
|                                         |       | GO:0005694~chromosome                               | 1.880  |
|                                         |       | GO:0000777~condensed chromosome kinetochore         | 4.971  |
|                                         |       | GO:0008022~protein C-terminus binding               | 2.769  |
|                                         |       | GO:0000776~kinetochore                              | 3.744  |
|                                         |       | GO:0044427~chromosomal part                         | 1.743  |
| Annotation Cluster 4<br>(Motor protein) | 2.788 | GO:0005819~spindle                                  | 6.538  |
|                                         |       | domain:Kinesin-motor                                | 15.153 |
|                                         |       | GO:0015630~microtubule cytoskeleton                 | 2.976  |
|                                         |       | IPR001752:Kinesin, motor region                     | 12.795 |
|                                         |       | IPR019821:Kinesin, motor region, conserved site     | 12.795 |
|                                         |       | SM00129:KISc                                        | 11.143 |
|                                         |       | GO:0003777~microtubule motor activity               | 7.606  |
|                                         |       | motor protein                                       | 5.796  |
|                                         |       | GO:0003774~motor activity                           | 4.812  |
|                                         |       | GO:0007018~microtubule-based movement               | 5.243  |
|                                         |       | GO:0007017~microtubule-based process                | 2.732  |
|                                         |       | microtubule                                         | 2.839  |
|                                         |       | GO:0005874~microtubule                              | 2.104  |
| Annotation Cluster 5<br>(Cell motility) | 2.731 | GO:0016477~cell migration                           | 4.651  |
|                                         |       | GO:0051674~localization of cell                     | 4.181  |
|                                         |       | GO:0048870~cell motility                            | 4.181  |

|                                      |       |
|--------------------------------------|-------|
| GO:0006928~cell motion               | 3.326 |
| GO:0007610~behavior                  | 2.316 |
| GO:0007626~locomotory behavior       | 2.883 |
| GO:0042330~taxis                     | 3.703 |
| GO:0006935~chemotaxis                | 3.703 |
| hsa04062:Chemokine signaling pathway | 2.266 |

---

**Table S5. List of genes whose expression levels were downregulated or upregulated by Prox1 knockdown, related to Figures 4 and 5.**

**Downregulated genes**

| Probe ID | Gene Symbol | Fold Change<br>(siProx1/siContro | Gene Description                                                                            |
|----------|-------------|----------------------------------|---------------------------------------------------------------------------------------------|
| 8097957  | GUCY1A3     | 0.069                            | guanylate cyclase 1, soluble, alpha 3                                                       |
| 8105302  | FST         | 0.079                            | follistatin                                                                                 |
| 8112045  | ESM1        | 0.104                            | endothelial cell-specific molecule 1                                                        |
| 8046536  | HOXD10      | 0.104                            | homeobox D10                                                                                |
| 7971077  | POSTN       | 0.107                            | periostin, osteoblast specific factor                                                       |
| 7946579  | LYVE1       | 0.113                            | lymphatic vessel endothelial hyaluronan receptor 1                                          |
| 8105121  | GHR         | 0.114                            | growth hormone receptor                                                                     |
| 8161755  | ALDH1A1     | 0.127                            | aldehyde dehydrogenase 1 family, member A1                                                  |
| 7909877  | MOSC1       | 0.135                            | MOCO sulphurase C-terminal domain containing 1                                              |
| 8046695  | ITGA4       | 0.135                            | integrin, alpha 4 (antigen CD49D, alpha 4 subunit of VLA-4 receptor)   ceramide kinase-like |
| 7899939  | GJA4        | 0.138                            | gap junction protein, alpha 4, 37kDa                                                        |
| 8141016  | TFPI2       | 0.141                            | tissue factor pathway inhibitor 2                                                           |
| 7917798  | ABCA4       | 0.142                            | ATP-binding cassette, sub-family A (ABC1), member 4                                         |
| 8097973  | GUCY1B3     | 0.145                            | guanylate cyclase 1, soluble, beta 3                                                        |
| 7950933  | NOX4        | 0.147                            | NADPH oxidase 4                                                                             |
| 8058552  | IDH1        | 0.148                            | isocitrate dehydrogenase 1 (NADP+), soluble                                                 |
| 8044225  | SULT1C4     | 0.154                            | sulfotransferase family, cytosolic, 1C, member 4                                            |
| 8140686  | SEMA3D      | 0.157                            | sema domain, immunoglobulin domain (Ig), short basic domain, secreted, (semaphorin) 3D      |
| 7961514  | MGP         | 0.160                            | matrix Gla protein                                                                          |
| 7908543  | NEK7        | 0.168                            | NIMA (never in mitosis gene a)-related kinase 7                                             |
| 8131666  | ITGB8       | 0.173                            | integrin, beta 8                                                                            |
| 7961507  | ART4        | 0.177                            | ADP-ribosyltransferase 4 (Dombrock blood group)                                             |
| 7983650  | SLC27A2     | 0.178                            | solute carrier family 27 (fatty acid transporter), member 2                                 |
| 8060988  | BTBD3       | 0.178                            | BTB (POZ) domain containing 3                                                               |
| 7912537  | DHRS3       | 0.179                            | dehydrogenase/reductase (SDR family) member 3                                               |
| 8069668  | CYYR1       | 0.184                            | cysteine/tyrosine-rich 1                                                                    |

|         |          |       |                                                                        |
|---------|----------|-------|------------------------------------------------------------------------|
| 7902074 | LEPR     | 0.186 | leptin receptor   leptin receptor overlapping transcript               |
| 7965573 | NTN4     | 0.190 | netrin 4                                                               |
| 8152703 | FBXO32   | 0.198 | F-box protein 32                                                       |
| 8113358 | ST8SIA4  | 0.201 | ST8 alpha-N-acetyl-neuraminide alpha-2,8-sialyltransferase 4           |
| 8131600 | TSPAN13  | 0.203 | tetraspanin 13                                                         |
| 8104234 | TRIP13   | 0.204 | thyroid hormone receptor interactor 13   bromodomain containing 9      |
| 7972713 | EFNB2    | 0.208 | ephrin-B2                                                              |
| 7968637 | CCNA1    | 0.211 | cyclin A1                                                              |
| 8094789 | LIMCH1   | 0.212 | LIM and calponin homology domains 1                                    |
| 7968789 | C13orf15 | 0.213 | chromosome 13 open reading frame 15                                    |
| 8112033 | ARL15    | 0.215 | ADP-ribosylation factor-like 15                                        |
| 7994074 | SCNN1B   | 0.216 | sodium channel, nonvoltage-gated 1, beta                               |
| 7906930 | NUF2     | 0.216 |                                                                        |
| 8129666 | SLC2A12  | 0.224 | solute carrier family 2 (facilitated glucose transporter), member 12   |
| 8141094 | PDK4     | 0.226 | pyruvate dehydrogenase kinase, isozyme 4                               |
| 8106354 | IQGAP2   | 0.226 | IQ motif containing GTPase activating protein 2                        |
| 8089544 | CCDC80   | 0.226 | coiled-coil domain containing 80                                       |
| 8103932 | MLF1IP   | 0.226 | MLF1 interacting protein                                               |
| 7930454 | PDCD4    | 0.232 | programmed cell death 4 (neoplastic transformation inhibitor)          |
| 8046542 | HOXD9    | 0.236 | homeobox D9                                                            |
| 8061564 | ID1      | 0.239 | inhibitor of DNA binding 1, dominant negative helix-loop-helix protein |
| 7988467 | FBN1     | 0.241 | fibrillin 1                                                            |
| 7909681 | PROX1    | 0.246 | prospero homeobox 1                                                    |
| 8102587 | C4orf31  | 0.246 | chromosome 4 open reading frame 31                                     |
| 7919715 | ANP32E   | 0.248 | acidic (leucine-rich) nuclear phosphoprotein 32 family, member E       |
| 8094719 | N4BP2    | 0.249 | NEDD4 binding protein 2                                                |
| 7922889 | IVNS1ABP | 0.249 | influenza virus NS1A binding protein                                   |
| 8023757 | CD226    | 0.250 |                                                                        |
| 8133818 | PHTF2    | 0.252 | putative homeodomain transcription factor 2                            |
| 7927710 | CDC2     | 0.255 | cyclin-dependent kinase 1   cell division cycle 2, G1 to S and G2 to M |
| 8107706 | LMNB1    | 0.255 | lamin B1                                                               |

|         |          |       |                                                                                                 |
|---------|----------|-------|-------------------------------------------------------------------------------------------------|
| 7902452 | AK5      | 0.258 | adenylate kinase 5                                                                              |
| 7929132 | PCGF5    | 0.259 | polycomb group ring finger 5                                                                    |
| 8105229 | PELO     | 0.260 | pelota homolog (Drosophila)   integrin, alpha 1                                                 |
| 7968351 | C13orf33 | 0.260 | chromosome 13 open reading frame 33                                                             |
| 8102076 | CENPE    | 0.261 | centromere protein E, 312kDa                                                                    |
| 8150103 | GTF2E2   | 0.263 | general transcription factor IIE, polypeptide 2, beta 34kDa                                     |
| 7991406 | PRC1     | 0.264 | protein regulator of cytokinesis 1                                                              |
| 8081288 | TMEM45A  | 0.264 | transmembrane protein 45A                                                                       |
| 8047606 | NBEAL1   | 0.264 | neurobeachin-like 1                                                                             |
| 7979158 | TXNDC16  | 0.265 | thioredoxin domain containing 16                                                                |
| 7923189 | KIF14    | 0.266 | kinesin family member 14                                                                        |
| 8133876 | CD36     | 0.267 |                                                                                                 |
| 7982792 | RAD51    | 0.267 |                                                                                                 |
| 8151871 | CCNE2    | 0.268 | cyclin E2                                                                                       |
| 8140955 | CDK6     | 0.269 | cyclin-dependent kinase 6                                                                       |
| 7909708 | CENPF    | 0.269 | centromere protein F, 350/400ka (mitosin)                                                       |
| 8142524 | TSPAN12  | 0.269 | tetraspanin 12                                                                                  |
| 7905329 | MLLT11   | 0.269 | myeloid/lymphoid or mixed-lineage leukemia (trithorax homolog, Drosophila); translocated to, 11 |
| 8079237 | KIF15    | 0.270 | kinesin family member 15                                                                        |
| 8155540 | CNTNAP3B | 0.270 | contactin associated protein-like 3   contactin associated protein-like 3B                      |
| 8161460 | CNTNAP3B | 0.270 | contactin associated protein-like 3   contactin associated protein-like 3B                      |
| 8122701 |          | 0.270 |                                                                                                 |
| 8047596 |          | 0.270 | neurobeachin-like 1                                                                             |
| 7909890 | HLX      | 0.271 | H2.0-like homeobox                                                                              |
| 8153262 | SLC45A4  | 0.271 | solute carrier family 45, member 4                                                              |
| 8111892 | OXCT1    | 0.271 | 3-oxoacid CoA transferase 1                                                                     |
| 8088247 | ARHGEF3  | 0.272 | Rho guanine nucleotide exchange factor (GEF) 3                                                  |
| 8113073 | ARRDC3   | 0.272 | arrestin domain containing 3                                                                    |
| 8040223 | RRM2     | 0.274 | ribonucleotide reductase M2                                                                     |
| 8124527 | HIST1H1B | 0.274 | histone cluster 1, H1b                                                                          |
| 8103728 | HMGB2    | 0.278 | high-mobility group box 2                                                                       |

|         |          |       |                                                                                       |
|---------|----------|-------|---------------------------------------------------------------------------------------|
| 7922976 | PTGS2    | 0.279 | prostaglandin-endoperoxide synthase 2 (prostaglandin G/H synthase and cyclooxygenase) |
| 8053551 | REEP1    | 0.280 | receptor accessory protein 1                                                          |
| 7974404 | CDKN3    | 0.281 | cyclin-dependent kinase inhibitor 3                                                   |
| 7923086 | ASPM     | 0.281 | asp (abnormal spindle) homolog, microcephaly associated (Drosophila)                  |
| 8124650 | UBD      | 0.281 | ubiquitin D   gamma-aminobutyric acid (GABA) B receptor, 1                            |
| 7916898 | DEPDC1   | 0.282 | DEP domain containing 1                                                               |
| 7990054 | UACA     | 0.285 | uveal autoantigen with coiled-coil domains and ankyrin repeats                        |
| 8113491 | STARD4   | 0.285 | StAR-related lipid transfer (START) domain containing 4                               |
| 8057599 | TFPI     | 0.291 | tissue factor pathway inhibitor (lipoprotein-associated coagulation inhibitor)        |
| 7979307 | DLGAP5   | 0.292 | discs, large (Drosophila) homolog-associated protein 5                                |
| 8019857 | NDC80    | 0.292 |                                                                                       |
| 8178295 | UBD      | 0.293 | ubiquitin D   gamma-aminobutyric acid (GABA) B receptor, 1                            |
| 7951077 | SESN3    | 0.294 | sestrin 3                                                                             |
| 7969438 | LMO7     | 0.295 | LIM domain 7                                                                          |
| 7984704 | NEO1     | 0.296 | neogenin homolog 1 (chicken)                                                          |
| 8120838 | TTK      | 0.297 |                                                                                       |
| 7954293 | PDE3A    | 0.298 | phosphodiesterase 3A, cGMP-inhibited                                                  |
| 7983350 | EIF3J    | 0.298 | eukaryotic translation initiation factor 3, subunit J                                 |
| 8042270 | UGP2     | 0.300 | UDP-glucose pyrophosphorylase 2                                                       |
| 8155359 | CNTNAP3B | 0.301 | contactin associated protein-like 3   contactin associated protein-like 3B            |
| 8013671 | SPAG5    | 0.301 | sperm associated antigen 5   uncharacterized serine/threonine-protein kinase SgK494   |
| 8077731 | FANCD2   | 0.302 | Fanconi anemia, complementation group D2                                              |
| 8137240 | GIMAP7   | 0.302 | GTPase, IMAP family member 7                                                          |
| 8061772 | MAPRE1   | 0.303 | microtubule-associated protein, RP/EB family, member 1                                |
| 8050160 | MBOAT2   | 0.303 | membrane bound O-acyltransferase domain containing 2                                  |
| 8137526 | INSIG1   | 0.304 | insulin induced gene 1                                                                |
| 8149955 | PBK      | 0.304 | PDZ binding kinase                                                                    |
| 7947248 | KIF18A   | 0.305 | kinesin family member 18A                                                             |
| 8056572 | SPC25    | 0.305 |                                                                                       |
| 8141950 | RELN     | 0.306 | reelin                                                                                |
| 7983969 | CCNB2    | 0.306 | cyclin B2                                                                             |



|         |         |       |                                                                                                 |
|---------|---------|-------|-------------------------------------------------------------------------------------------------|
| 8123800 |         | 0.306 |                                                                                                 |
| 7985829 | FANCI   | 0.306 | Fanconi anemia, complementation group I   polymerase (DNA directed), gamma                      |
| 7929334 | CEP55   | 0.307 | centrosomal protein 55kDa                                                                       |
| 8144036 | XRCC2   | 0.307 | X-ray repair complementing defective repair in Chinese hamster cells 2                          |
| 8092169 | TNFSF10 | 0.307 | tumor necrosis factor (ligand) superfamily, member 10                                           |
| 8054580 | BUB1    | 0.308 | budding uninhibited by benzimidazoles 1 homolog (yeast)                                         |
| 8112260 | DEPDC1B | 0.308 | DEP domain containing 1B                                                                        |
| 8109712 | HMMR    | 0.309 | hyaluronan-mediated motility receptor (RHAMM)                                                   |
| 8166784 | TSPAN7  | 0.309 | tetraspanin 7                                                                                   |
| 7934026 | DNA2    | 0.313 | DNA replication helicase 2 homolog (yeast)                                                      |
| 8108301 | KIF20A  | 0.313 | kinesin family member 20A   cell division cycle 23 homolog ( <i>S. cerevisiae</i> )             |
| 7933733 | FAM13C  | 0.313 | family with sequence similarity 13, member C   phytanoyl-CoA 2-hydroxylase interacting protein- |
| 8134339 | PEG10   | 0.315 | paternally expressed 10                                                                         |
| 8151496 | ZNF704  | 0.315 | zinc finger protein 704                                                                         |
| 8049317 | DGKD    | 0.315 | diacylglycerol kinase, delta 130kDa                                                             |
| 8168622 | KLHL4   | 0.316 | kelch-like 4 ( <i>Drosophila</i> )                                                              |
| 8007931 | ITGB3   | 0.316 | integrin, beta 3 (platelet glycoprotein IIIa, antigen CD61)                                     |
| 7997491 | HSD17B2 | 0.316 | hydroxysteroid (17-beta) dehydrogenase 2                                                        |
| 8127109 | ICK     | 0.317 | intestinal cell (MAK-like) kinase                                                               |
| 8020806 | RNF125  | 0.317 | ring finger protein 125                                                                         |
| 8102560 | MAD2L1  | 0.318 | MAD2 mitotic arrest deficient-like 1 (yeast)                                                    |
| 7971866 | DIAPH3  | 0.318 | diaphanous homolog 3 ( <i>Drosophila</i> )                                                      |
| 8091078 | RBP1    | 0.319 | retinol binding protein 1, cellular                                                             |
| 8105348 | GPX8    | 0.319 | glutathione peroxidase 8 (putative)                                                             |
| 8113709 | LOX     | 0.319 | lysyl oxidase                                                                                   |
| 7979241 | BMP4    | 0.321 | bone morphogenetic protein 4                                                                    |
| 8098006 | GLRB    | 0.321 | glycine receptor, beta                                                                          |
| 7940147 | FAM111B | 0.321 | family with sequence similarity 111, member B                                                   |
| 8111915 | SEPP1   | 0.322 | selenoprotein P, plasma, 1                                                                      |
| 8046546 | HOXD8   | 0.322 | homeobox D8                                                                                     |
| 7909568 | DTL     | 0.323 | denticleless homolog ( <i>Drosophila</i> )                                                      |

|         |         |                                                                                                  |
|---------|---------|--------------------------------------------------------------------------------------------------|
| 7974920 | SYNE2   | 0.324 spectrin repeat containing, nuclear envelope 2                                             |
| 7972157 | EDNRB   | 0.324 endothelin receptor type B                                                                 |
| 8055465 | CXCR4   | 0.324 chemokine (C-X-C motif) receptor 4                                                         |
| 7990391 | CYP1A1  | 0.324 cytochrome P450, family 1, subfamily A, polypeptide 1                                      |
| 8157381 | ZNF618  | 0.325 zinc finger protein 618                                                                    |
| 7979743 | RDH11   | 0.325 retinol dehydrogenase 11 (all-trans/9-cis/11-cis)                                          |
| 8077899 | PPARG   | 0.326 peroxisome proliferator-activated receptor gamma                                           |
| 8091715 | LXN     | 0.328 latexin                                                                                    |
| 8151768 | RUNX1T1 | 0.328 runt-related transcription factor 1; translocated to, 1 (cyclin D-related)                 |
| 7951363 | CASP12  | 0.328 caspase 12 (gene/pseudogene)                                                               |
| 8117018 |         | 0.329                                                                                            |
| 7944375 | TRAPPC4 | 0.329 trafficking protein particle complex 4                                                     |
| 7901010 | KIF2C   | 0.329 kinesin family member 2C                                                                   |
| 7929438 | HELLS   | 0.329 helicase, lymphoid-specific                                                                |
| 8041273 | YIPF4   | 0.330 Yip1 domain family, member 4                                                               |
| 7929078 | KIF20B  | 0.331 kinesin family member 20B                                                                  |
| 7975268 | ARG2    | 0.331 arginase, type II   vesicle transport through interaction with t-SNAREs homolog 1B (yeast) |
| 7969626 | GPR180  | 0.331 G protein-coupled receptor 180                                                             |
| 8132318 | ANLN    | 0.331 anillin, actin binding protein                                                             |
| 7928944 | PAPSS2  | 0.332 3'-phosphoadenosine 5'-phosphosulfate synthase 2                                           |
| 7995681 | MMP2    | 0.332 matrix metalloproteinase 2 (gelatinase A, 72kDa gelatinase, 72kDa type IV collagenase)     |
| 8151572 | SNX16   | 0.333 sorting nexin 16                                                                           |
| 7960947 | A2M     | 0.333 alpha-2-macroglobulin                                                                      |
| 8137244 | GIMAP4  | 0.334 GTPase, IMAP family member 4                                                               |
| 7932911 | KIF5B   | 0.335 kinesin family member 5B                                                                   |
| 8058570 | C2orf67 | 0.335 chromosome 2 open reading frame 67                                                         |
| 7910387 | RHOU    | 0.335 ras homolog gene family, member U                                                          |
| 8040090 | RNF144A | 0.335 ring finger protein 144A                                                                   |
| 8144226 |         | 0.337                                                                                            |
| 8095422 | STATH   | 0.337 statherin                                                                                  |
| 8152668 | ATAD2   | 0.337 ATPase family, AAA domain containing 2                                                     |

|         |              |       |                                                                                   |
|---------|--------------|-------|-----------------------------------------------------------------------------------|
| 8151457 | HEY1         | 0.338 | hairy/enhancer-of-split related with YRPW motif 1                                 |
| 8001133 | SHCBP1       | 0.338 | SHC SH2-domain binding protein 1                                                  |
| 8081657 | CD200        | 0.339 |                                                                                   |
| 7982889 | NUSAP1       | 0.340 | nucleolar and spindle associated protein 1                                        |
| 8021187 | SKA1         | 0.340 | spindle and kinetochore associated complex subunit 1                              |
| 8161839 | C9orf95      | 0.342 | chromosome 9 open reading frame 95                                                |
| 8171418 | PIGA         | 0.342 | phosphatidylinositol glycan anchor biosynthesis, class A                          |
| 8135734 | C7orf58      | 0.342 | chromosome 7 open reading frame 58                                                |
| 8161249 | MCART1       | 0.342 | mitochondrial carrier triple repeat 1                                             |
| 8112342 | ADAMTS6      | 0.344 | ADAM metallopeptidase with thrombospondin type 1 motif, 6                         |
| 8008784 | PRR11        | 0.344 | proline rich 11                                                                   |
| 8008629 | DGKE         | 0.345 | diacylglycerol kinase, epsilon 64kDa                                              |
| 8155460 | CNTNAP3      | 0.345 | contactin associated protein-like 3   contactin associated protein-like 3B        |
| 7953218 | RAD51AP1     | 0.346 | RAD51 associated protein 1                                                        |
| 8056963 | LOC100129455 | 0.346 |                                                                                   |
| 8171352 | TRAPPC2      | 0.347 | trafficking protein particle complex 2                                            |
| 8008598 | PCTP         | 0.348 | phosphatidylcholine transfer protein                                              |
| 8161288 | CNTNAP3      | 0.349 | contactin associated protein-like 3   similar to cell recognition molecule CASPR3 |
| 8138337 | TMEM195      | 0.349 | transmembrane protein 195                                                         |
| 8167006 | RP2          | 0.349 | retinitis pigmentosa 2 (X-linked recessive)                                       |
| 8097857 | MND1         | 0.350 | meiotic nuclear divisions 1 homolog ( <i>S. cerevisiae</i> )                      |
| 8096415 | MMRN1        | 0.350 | multimerin 1                                                                      |
| 8057394 | SESTD1       | 0.350 | SEC14 and spectrin domains 1                                                      |
| 8081667 | SLC35A5      | 0.350 | solute carrier family 35, member A5                                               |
| 8121749 | GJA1         | 0.350 | gap junction protein, alpha 1, 43kDa                                              |
| 7938592 | FAR1         | 0.351 | fatty acyl CoA reductase 1                                                        |
| 8166925 | MAOA         | 0.352 | monoamine oxidase A                                                               |
| 8124394 | HIST1H2BB    | 0.352 | histone cluster 1, H2bb                                                           |
| 8145570 | ESCO2        | 0.352 | establishment of cohesion 1 homolog 2 ( <i>S. cerevisiae</i> )                    |
| 8131709 | SP4          | 0.352 | Sp4 transcription factor                                                          |
| 8068612 | WRB          | 0.354 | tryptophan rich basic protein                                                     |

|         |           |       |                                                                                                                                 |
|---------|-----------|-------|---------------------------------------------------------------------------------------------------------------------------------|
| 8017262 | BRIP1     | 0.354 | BRCA1 interacting protein C-terminal helicase 1                                                                                 |
| 7918323 | SORT1     | 0.354 | sortilin 1                                                                                                                      |
| 8144153 | NCAPG2    | 0.355 | non-SMC condensin II complex, subunit G2                                                                                        |
| 7971820 | VPS36     | 0.355 | vacuolar protein sorting 36 homolog ( <i>S. cerevisiae</i> )                                                                    |
| 7910997 | EXO1      | 0.355 | exonuclease 1                                                                                                                   |
| 8046086 | LASS6     | 0.356 | LAG1 homolog, ceramide synthase 6                                                                                               |
| 7957850 | GAS2L3    | 0.356 | growth arrest-specific 2 like 3                                                                                                 |
| 7980547 | SEL1L     | 0.357 | sel-1 suppressor of lin-12-like ( <i>C. elegans</i> )                                                                           |
| 8143433 | MRPS33    | 0.357 | mitochondrial ribosomal protein S33                                                                                             |
| 7971620 | KPNA3     | 0.357 | karyopherin alpha 3 (importin alpha 4)                                                                                          |
| 8022488 | ABHD3     | 0.358 | abhydrolase domain containing 3                                                                                                 |
| 7982287 | ARHGAP11B | 0.359 | Rho GTPase activating protein 11B                                                                                               |
| 8054702 | CKAP2L    | 0.359 | cytoskeleton associated protein 2-like                                                                                          |
| 7907104 | DCAF6     | 0.359 | DDB1 and CUL4 associated factor 6                                                                                               |
| 7924712 | LIN9      | 0.360 | lin-9 homolog ( <i>C. elegans</i> )                                                                                             |
| 7923426 | UBE2T     | 0.360 | ubiquitin-conjugating enzyme E2T (putative)                                                                                     |
| 8057929 |           | 0.361 |                                                                                                                                 |
| 7928395 | FUT11     | 0.361 | fucosyltransferase 11 (alpha (1,3) fucosyltransferase)   FLJ44715 gene product                                                  |
| 7990253 | NPTN      | 0.361 | neuroplastin                                                                                                                    |
| 8138353 | MEOX2     | 0.362 | mesenchyme homeobox 2                                                                                                           |
| 8023165 | HDHD2     | 0.363 | haloacid dehalogenase-like hydrolase domain containing 2                                                                        |
| 7940372 | TMEM109   | 0.364 | transmembrane protein 109                                                                                                       |
| 8083839 | GPR160    | 0.364 | G protein-coupled receptor 160                                                                                                  |
| 7982757 | CASC5     | 0.364 | cancer susceptibility candidate 5                                                                                               |
| 8025303 | CLEC4M    | 0.364 | C-type lectin domain family 4, member M                                                                                         |
| 8145136 | PPP3CC    | 0.365 | protein phosphatase 3, catalytic subunit, gamma isozyme   protein phosphatase 3 (formerly 2B), catalytic subunit, gamma isoform |
| 7917088 | PIGK      | 0.365 | phosphatidylinositol glycan anchor biosynthesis, class K                                                                        |
| 8148448 | KHDRBS3   | 0.365 | KH domain containing, RNA binding, signal transduction associated 3                                                             |
| 8088550 | PRICKLE2  | 0.365 | prickle homolog 2 ( <i>Drosophila</i> )                                                                                         |
| 8103951 | ACSL1     | 0.365 | acyl-CoA synthetase long-chain family member 1                                                                                  |

|         |           |       |                                                                                             |
|---------|-----------|-------|---------------------------------------------------------------------------------------------|
| 7898328 | C1orf144  | 0.365 | chromosome 1 open reading frame 144                                                         |
| 7902104 | PDE4B     | 0.365 | phosphodiesterase 4B, cAMP-specific (phosphodiesterase E4 dunce homolog, Drosophila)        |
| 7999884 |           | 0.366 |                                                                                             |
| 8062557 | PPP1R16B  | 0.366 | protein phosphatase 1, regulatory (inhibitor) subunit 16B                                   |
| 7914878 |           | 0.368 | arsenic transactivated protein 1                                                            |
| 7982358 | ARHGAP11A | 0.369 | Rho GTPase activating protein 11A                                                           |
| 7962499 | SFRS2IP   | 0.369 | splicing factor, arginine/serine-rich 2, interacting protein                                |
| 8014974 | TOP2A     | 0.369 | topoisomerase (DNA) II alpha 170kDa                                                         |
| 8097586 | GAB1      | 0.370 | GRB2-associated binding protein 1                                                           |
| 8172035 | DYNLT3    | 0.370 | dynein, light chain, Tctex-type 3                                                           |
| 8085754 | SGOL1     | 0.370 | shugoshin-like 1 (S. pombe)                                                                 |
| 8152053 | ANKRD46   | 0.370 | ankyrin repeat domain 46                                                                    |
| 8145636 | HMBOX1    | 0.370 | homeobox containing 1                                                                       |
| 7937020 | MKI67     | 0.370 | antigen identified by monoclonal antibody Ki-67                                             |
| 8016088 | CCDC43    | 0.371 | coiled-coil domain containing 43                                                            |
| 8112596 | ANKRA2    | 0.371 | ankyrin repeat, family A (RFXANK-like), 2                                                   |
| 8095299 |           | 0.371 |                                                                                             |
| 8091009 | PIK3CB    | 0.372 | phosphoinositide-3-kinase, catalytic, beta polypeptide                                      |
| 7913655 | ID3       | 0.372 | inhibitor of DNA binding 3, dominant negative helix-loop-helix protein                      |
| 8094278 | NCAPG     | 0.372 | non-SMC condensin I complex, subunit G   ligand dependent nuclear receptor corepressor-like |
| 8134180 | ANKIB1    | 0.372 | ankyrin repeat and IBR domain containing 1                                                  |
| 8105842 | CENPH     | 0.373 | centromere protein H                                                                        |
| 8168873 | LOC653354 | 0.373 | armadillo repeat containing, X-linked 6                                                     |
| 8131944 | NFE2L3    | 0.374 | nuclear factor (erythroid-derived 2)-like 3                                                 |
| 8121911 | C6orf173  | 0.374 | centromere protein W   chromosome 6 open reading frame 173                                  |
| 7978846 | POLE2     | 0.374 | polymerase (DNA directed), epsilon 2 (p59 subunit)                                          |
| 7974372 | GPR137C   | 0.374 | G protein-coupled receptor 137C                                                             |
| 8151684 |           | 0.374 | matrix metalloproteinase 16 (membrane-inserted)                                             |
| 8021946 | COLEC12   | 0.374 | collectin sub-family member 12                                                              |
| 8007071 | CDC6      | 0.374 | cell division cycle 6 homolog (S. cerevisiae)                                               |
| 8021286 | C18orf54  | 0.375 | chromosome 18 open reading frame 54                                                         |

|         |           |       |                                                                                                            |
|---------|-----------|-------|------------------------------------------------------------------------------------------------------------|
| 8168794 | CENPI     | 0.375 | centromere protein I                                                                                       |
| 7952830 | NCAPD3    | 0.376 | non-SMC condensin II complex, subunit D3                                                                   |
| 8056877 | CHRNA1    | 0.376 | cholinergic receptor, nicotinic, alpha 1 (muscle)                                                          |
| 8150186 | RNF122    | 0.376 | ring finger protein 122                                                                                    |
| 8031573 | RFPL4A    | 0.376 | ret finger protein-like 4A                                                                                 |
| 7923034 | B3GALT2   | 0.377 | UDP-Gal:betaGlcNAc beta 1,3-galactosyltransferase, polypeptide 2                                           |
| 8101624 | KLHL8     | 0.377 | kelch-like 8 (Drosophila)                                                                                  |
| 8124166 | MBOAT1    | 0.378 | membrane bound O-acyltransferase domain containing 1                                                       |
| 7980080 | ENTPD5    | 0.379 | ectonucleoside triphosphate diphosphohydrolase 5                                                           |
| 7962085 | IPO8      | 0.379 | importin 8                                                                                                 |
| 8122013 | L3MBTL3   | 0.379 | l(3)mbt-like 3 (Drosophila)                                                                                |
| 7901788 | NFIA      | 0.380 | nuclear factor I/A                                                                                         |
| 7985522 | ADAMTSL3  | 0.381 | ADAMTS-like 3                                                                                              |
| 8038202 | BCAT2     | 0.381 | branched chain amino-acid transaminase 2, mitochondrial   branched chain aminotransferase 2, mitochondrial |
| 7915787 | PIK3R3    | 0.381 | phosphoinositide-3-kinase, regulatory subunit 3 (gamma)                                                    |
| 7903092 | FNBP1L    | 0.381 | formin binding protein 1-like                                                                              |
| 7971653 | DLEU2     | 0.381 | deleted in lymphocytic leukemia 2 (non-protein coding)                                                     |
| 7962559 | SLC38A4   | 0.382 | solute carrier family 38, member 4                                                                         |
| 8168146 | KIF4A     | 0.383 | kinesin family member 4A                                                                                   |
| 8018558 | ACOX1     | 0.383 | acyl-CoA oxidase 1, palmitoyl   acyl-Coenzyme A oxidase 1, palmitoyl                                       |
| 8040712 | CENPA     | 0.384 | centromere protein A                                                                                       |
| 8097356 | PLK4      | 0.384 | polo-like kinase 4 (Drosophila)                                                                            |
| 8140709 | KIAA1324L | 0.384 | KIAA1324-like                                                                                              |
| 8107234 | MAN2A1    | 0.385 | mannosidase, alpha, class 2A, member 1                                                                     |
| 8166289 | CDKL5     | 0.386 | cyclin-dependent kinase-like 5                                                                             |
| 8146130 | GINS4     | 0.387 | GINS complex subunit 4 (Sld5 homolog)                                                                      |
| 8078252 | UBE2E2    | 0.388 | ubiquitin-conjugating enzyme E2E 2 (UBC4/5 homolog, yeast)                                                 |
| 8027348 | ZNF730    | 0.388 | zinc finger protein 730                                                                                    |
| 7957746 | SLC25A3   | 0.388 | solute carrier family 25 (mitochondrial carrier; phosphate carrier), member 3                              |
| 8089203 | SENP7     | 0.388 | SUMO1/sentrin specific peptidase 7                                                                         |

|         |          |       |                                                                |
|---------|----------|-------|----------------------------------------------------------------|
| 8117640 | ZSCAN16  | 0.389 | zinc finger and SCAN domain containing 16                      |
| 7966829 | WSB2     | 0.389 | WD repeat and SOCS box-containing 2                            |
| 7926259 | MCM10    | 0.389 | minichromosome maintenance complex component 10                |
| 8062766 | MYBL2    | 0.389 | v-myb myeloblastosis viral oncogene homolog (avian)-like 2     |
| 8122327 | CCDC28A  | 0.390 | coiled-coil domain containing 28A                              |
| 8132501 |          | 0.390 |                                                                |
| 8111960 | C5orf34  | 0.392 | chromosome 5 open reading frame 34                             |
| 8004691 | TMEM88   | 0.392 | transmembrane protein 88                                       |
| 7980744 | RPS6KA5  | 0.392 | ribosomal protein S6 kinase, 90kDa, polypeptide 5              |
| 8147461 | SDC2     | 0.393 | syndecan 2                                                     |
| 8125850 | C6orf106 | 0.393 | chromosome 6 open reading frame 106                            |
| 7918026 | EXTL2    | 0.394 | exostoses (multiple)-like 2                                    |
| 7974387 | STYX     | 0.394 | serine/threonine/tyrosine interacting protein                  |
| 8161192 | RNF38    | 0.394 | ring finger protein 38                                         |
| 8023598 | RNF152   | 0.395 | ring finger protein 152                                        |
| 8067167 | AURKA    | 0.395 | aurora kinase A                                                |
| 7958031 | C12orf48 | 0.395 | chromosome 12 open reading frame 48                            |
| 8161224 | ZBTB5    | 0.395 | zinc finger and BTB domain containing 5                        |
| 7979281 | WDHD1    | 0.396 | WD repeat and HMG-box DNA binding protein 1                    |
| 8161701 | TMEM2    | 0.396 | transmembrane protein 2                                        |
| 8134351 | PPP1R9A  | 0.396 | protein phosphatase 1, regulatory (inhibitor) subunit 9A       |
| 8104066 | SORBS2   | 0.397 | sorbin and SH3 domain containing 2                             |
| 8112570 | MRPS27   | 0.398 | mitochondrial ribosomal protein S27                            |
| 8002969 | MAF      | 0.398 | v-maf musculoaponeurotic fibrosarcoma oncogene homolog (avian) |
| 8043602 | NCAPH    | 0.399 | non-SMC condensin I complex, subunit H                         |
| 7906061 | SYT11    | 0.399 | synaptotagmin XI                                               |
| 7987869 | TMEM87A  | 0.399 | transmembrane protein 87A                                      |
| 8135480 | DNAJB9   | 0.399 | DnaJ (Hsp40) homolog, subfamily B, member 9                    |
| 8100798 | SULT1B1  | 0.399 | sulfotransferase family, cytosolic, 1B, member 1               |
| 7984259 | RNU5B-1  | 0.400 | RNA, U5B small nuclear 1                                       |
| 7938880 | HTATIP2  | 0.400 | HIV-1 Tat interactive protein 2, 30kDa                         |

|         |          |       |                                                                                                   |
|---------|----------|-------|---------------------------------------------------------------------------------------------------|
| 8142110 | SYPL1    | 0.400 | synaptophysin-like 1                                                                              |
| 7980940 | ATXN3    | 0.400 | ataxin 3                                                                                          |
| 7948987 | PLA2G16  | 0.400 | phospholipase A2, group XVI                                                                       |
| 7985873 | C15orf42 | 0.401 | chromosome 15 open reading frame 42                                                               |
| 8087907 | SEMA3G   | 0.401 | sema domain, immunoglobulin domain (Ig), short basic domain, secreted, (semaphorin) 3G            |
| 7943398 | YAP1     | 0.401 | Yes-associated protein 1   Yes-associated protein 1, 65kDa                                        |
| 8103399 | PDGFC    | 0.401 | platelet derived growth factor C                                                                  |
| 8156575 | ATMIN    | 0.402 | ATM interactor                                                                                    |
| 8102643 | CCNA2    | 0.402 | cyclin A2                                                                                         |
| 7950743 | RAB30    | 0.402 |                                                                                                   |
| 8031570 | RFPL4A   | 0.402 | ret finger protein-like 4A                                                                        |
| 8020149 | NAPG     | 0.403 | N-ethylmaleimide-sensitive factor attachment protein, gamma                                       |
| 8094625 | KLHL5    | 0.403 | kelch-like 5 (Drosophila)                                                                         |
| 7939197 | HIPK3    | 0.403 | homeodomain interacting protein kinase 3                                                          |
| 7930380 | ADD3     | 0.404 | adducin 3 (gamma)                                                                                 |
| 8092348 | LAMP3    | 0.404 | lysosomal-associated membrane protein 3                                                           |
| 7970513 | SKA3     | 0.405 | spindle and kinetochore associated complex subunit 3   mitochondrial ribosomal protein 63         |
| 8107673 | GRAMD3   | 0.405 | GRAM domain containing 3                                                                          |
| 8173506 | ERCC6L   | 0.405 | excision repair cross-complementing rodent repair deficiency, complementation group 6-like        |
| 7929258 | KIF11    | 0.406 | kinesin family member 11                                                                          |
| 8098423 | NEIL3    | 0.406 | nei endonuclease VIII-like 3 (E. coli)                                                            |
| 7924172 | NSL1     | 0.406 |                                                                                                   |
| 7935776 |          | 0.406 | stearoyl-CoA desaturase (delta-9-desaturase)                                                      |
| 7986068 | BLM      | 0.406 | Bloom syndrome, RecQ helicase-like                                                                |
| 8112107 | PPAP2A   | 0.406 | phosphatidic acid phosphatase type 2A   superkiller viralicidic activity 2-like 2 (S. cerevisiae) |
| 8023735 | TMX3     | 0.407 | thioredoxin-related transmembrane protein 3                                                       |
| 8153935 | ZNF252   | 0.407 | zinc finger protein 252                                                                           |
| 7914851 | CLSPN    | 0.407 | claspin homolog (Xenopus laevis)                                                                  |
| 8124537 | HIST1H3J | 0.408 | histone cluster 1, H3j                                                                            |
| 8102371 |          | 0.408 | chromosome 4 open reading frame 21                                                                |
| 8107307 | CAMK4    | 0.408 | calcium/calmodulin-dependent protein kinase IV                                                    |



|         |           |                                                                                                                |
|---------|-----------|----------------------------------------------------------------------------------------------------------------|
| 7926679 | KIAA1217  | 0.409                                                                                                          |
| 7908204 | HMCN1     | 0.409 hemicentin 1                                                                                             |
| 8097628 | HHIP      | 0.409 hedgehog interacting protein                                                                             |
| 8092177 | NCEH1     | 0.410 neutral cholesterol ester hydrolase 1                                                                    |
| 8083333 | EIF2A     | 0.410 eukaryotic translation initiation factor 2A, 65kDa                                                       |
| 7909332 | CD55      | 0.410                                                                                                          |
| 8123405 | LOC441179 | 0.410 chromosome 6 open reading frame 123   hypothetical LOC441179                                             |
| 8114991 | SH3TC2    | 0.411 SH3 domain and tetratricopeptide repeats 2                                                               |
| 8136388 | TMEM140   | 0.411 transmembrane protein 140                                                                                |
| 7926821 | MASTL     | 0.411 microtubule associated serine/threonine kinase-like                                                      |
| 8111533 | LMBRD2    | 0.411 LMBR1 domain containing 2                                                                                |
| 8057700 | ORMDL1    | 0.411 ORM1-like 1 ( <i>S. cerevisiae</i> )   PMS1 postmeiotic segregation increased 1 ( <i>S. cerevisiae</i> ) |
| 8099395 | RAB28     | 0.412                                                                                                          |
| 8103706 | AADAT     | 0.412 aminoadipate aminotransferase                                                                            |
| 8151686 | MMP16     | 0.413 matrix metalloproteinase 16 (membrane-inserted)                                                          |
| 8101648 | HSD17B11  | 0.414 hydroxysteroid (17-beta) dehydrogenase 11                                                                |
| 8088348 | FAM116A   | 0.414 family with sequence similarity 116, member A                                                            |
| 8123825 | SLC35B3   | 0.414 solute carrier family 35, member B3                                                                      |
| 8138799 | TRIL      | 0.414 TLR4 interactor with leucine rich repeats                                                                |
| 8057959 | PGAP1     | 0.415 post-GPI attachment to proteins 1                                                                        |
| 8145652 | LEPROTL1  | 0.415 leptin receptor overlapping transcript-like 1                                                            |
| 8113602 | CCDC112   | 0.415 coiled-coil domain containing 112                                                                        |
| 7951351 | PDGFD     | 0.415 platelet derived growth factor D                                                                         |
| 8105828 | CCNB1     | 0.415 cyclin B1                                                                                                |
| 8166632 | GK        | 0.415 glycerol kinase                                                                                          |
| 7984540 | KIF23     | 0.415 kinesin family member 23                                                                                 |
| 8157362 | ZNF618    | 0.416 zinc finger protein 618                                                                                  |
| 8047784 | ZDBF2     | 0.416 zinc finger, DBF-type containing 2                                                                       |
| 7925229 | B3GALNT2  | 0.416 beta-1,3-N-acetylgalactosaminyltransferase 2                                                             |
| 7962185 | AMN1      | 0.416 antagonist of mitotic exit network 1 homolog ( <i>S. cerevisiae</i> )   chromosome 12 open reading frame |
| 7907183 | C1orf112  | 0.416 SCY1-like 3 ( <i>S. cerevisiae</i> )   chromosome 1 open reading frame 112                               |

|         |          |       |                                                                                                     |
|---------|----------|-------|-----------------------------------------------------------------------------------------------------|
| 8151436 | PXMP3    | 0.416 | peroxisomal biogenesis factor 2   peroxisomal membrane protein 3, 35kDa                             |
| 7924603 | LBR      | 0.416 | lamin B receptor                                                                                    |
| 8174610 | LRCH2    | 0.417 | leucine-rich repeats and calponin homology (CH) domain containing 2                                 |
| 7948997 | ATL3     | 0.417 | atlastin GTPase 3                                                                                   |
| 8047288 | SGOL2    | 0.418 | shugoshin-like 2 ( <i>S. pombe</i> )                                                                |
| 8156905 | TMEFF1   | 0.418 | transmembrane protein with EGF-like and two follistatin-like domains 1                              |
| 8146921 | RDH10    | 0.418 | retinol dehydrogenase 10 (all-trans)                                                                |
| 8145685 |          | 0.418 |                                                                                                     |
| 8163383 | SUSD1    | 0.419 | sushi domain containing 1                                                                           |
| 8112159 | ANKRD55  | 0.419 | ankyrin repeat domain 55                                                                            |
| 8097288 | FAT4     | 0.419 | FAT tumor suppressor homolog 4 ( <i>Drosophila</i> )                                                |
| 7971780 | NEK3     | 0.419 | NIMA (never in mitosis gene a)-related kinase 3                                                     |
| 7957551 | SOCS2    | 0.419 | suppressor of cytokine signaling 2                                                                  |
| 7946245 | DCHS1    | 0.419 | dachsous 1 ( <i>Drosophila</i> )                                                                    |
| 8103415 | FAM198B  | 0.420 | family with sequence similarity 198, member B   chromosome 4 open reading frame 18                  |
| 8097521 | SCOC     | 0.420 | short coiled-coil protein                                                                           |
| 7928736 | NRG3     | 0.420 | neuregulin 3                                                                                        |
| 7963263 |          | 0.420 |                                                                                                     |
| 7917850 | ARHGAP29 | 0.420 | Rho GTPase activating protein 29                                                                    |
| 7901993 | CACHD1   | 0.421 | cache domain containing 1                                                                           |
| 8102751 | SCLT1    | 0.421 | sodium channel and clathrin linker 1                                                                |
| 8017619 |          | 0.421 |                                                                                                     |
| 8013906 | TWF1     | 0.421 | twinfilin, actin-binding protein, homolog 1 ( <i>Drosophila</i> )                                   |
| 8076403 | NAGA     | 0.421 | N-acetylgalactosaminidase, alpha-                                                                   |
| 7944006 | RBM7     | 0.422 | RNA binding motif protein 7                                                                         |
| 8120165 | CENPQ    | 0.422 | centromere protein Q                                                                                |
| 8079346 | SACM1L   | 0.422 | SAC1 suppressor of actin mutations 1-like ( <i>yeast</i> )                                          |
| 8017283 | INTS2    | 0.422 | integrator complex subunit 2                                                                        |
| 7989516 | HERC1    | 0.422 | hect (homologous to the E6-AP (UBE3A) carboxyl terminus) domain and RCC1 (CHC1)-like domain (RLD) 1 |
| 7989323 | BNIP2    | 0.423 | BCL2/adenovirus E1B 19kDa interacting protein 2                                                     |

|         |           |       |                                                                                          |
|---------|-----------|-------|------------------------------------------------------------------------------------------|
| 8015769 | BRCA1     | 0.423 | breast cancer 1, early onset                                                             |
| 8047926 | MAP2      | 0.423 | microtubule-associated protein 2                                                         |
| 7925342 | ERO1LB    | 0.423 | ERO1-like beta ( <i>S. cerevisiae</i> )                                                  |
| 7993588 | TMC7      | 0.424 | transmembrane channel-like 7                                                             |
| 8041967 | ERLEC1    | 0.424 | endoplasmic reticulum lectin 1                                                           |
| 8057677 | SLC40A1   | 0.425 | solute carrier family 40 (iron-regulated transporter), member 1                          |
| 8038981 | ZNF611    | 0.425 | zinc finger protein 611                                                                  |
| 7912196 |           | 0.425 |                                                                                          |
| 8006187 | ATAD5     | 0.425 | ATPase family, AAA domain containing 5                                                   |
| 8013243 | SHMT1     | 0.426 | serine hydroxymethyltransferase 1 (soluble)                                              |
| 8136614 | AGK       | 0.426 | acylglycerol kinase                                                                      |
| 7982854 | DLL4      | 0.426 | delta-like 4 ( <i>Drosophila</i> )                                                       |
| 8017582 | TEX2      | 0.426 | testis expressed 2                                                                       |
| 8138489 | CDCA7L    | 0.426 | cell division cycle associated 7-like                                                    |
| 8129418 | PTPRK     | 0.427 | protein tyrosine phosphatase, receptor type, K                                           |
| 7978449 | HECTD1    | 0.427 | HECT domain containing 1                                                                 |
| 8054308 | TBC1D8    | 0.427 | TBC1 domain family, member 8 (with GRAM domain)                                          |
| 8168691 | DIAPH2    | 0.427 | diaphanous homolog 2 ( <i>Drosophila</i> )                                               |
| 7961546 | EPS8      | 0.428 | epidermal growth factor receptor pathway substrate 8                                     |
| 7967386 | MPHOSPH9  | 0.428 | M-phase phosphoprotein 9                                                                 |
| 8146637 | YTHDF3    | 0.428 | YTH domain family, member 3                                                              |
| 8095566 | MOBKL1A   | 0.428 | MOB1, Mps One Binder kinase activator-like 1A (yeast)                                    |
| 7989647 | KIAA0101  | 0.428 | KIAA0101   casein kinase 1, gamma 1                                                      |
| 8148124 | MTBP      | 0.429 | Mdm2, transformed 3T3 cell double minute 2, p53 binding protein (mouse) binding protein, |
| 8145418 | CDCA2     | 0.429 | cell division cycle associated 2                                                         |
| 7982294 | LOC390561 | 0.429 | OTU domain containing 7A   hypothetical LOC440261                                        |
| 7919825 | ARNT      | 0.429 | aryl hydrocarbon receptor nuclear translocator                                           |
| 8151066 | ARMC1     | 0.429 | armadillo repeat containing 1                                                            |
| 8102311 | CASP6     | 0.430 | caspase 6, apoptosis-related cysteine peptidase                                          |
| 8102342 | ELOVL6    | 0.430 | ELOVL family member 6, elongation of long chain fatty acids (FEN1/Elo2, SUR4/Elo3-like,  |
| 8040103 | ID2       | 0.430 | inhibitor of DNA binding 2, dominant negative helix-loop-helix protein                   |

|         |             |                                                                                           |
|---------|-------------|-------------------------------------------------------------------------------------------|
| 8043900 | hCG_1790474 | 0.430                                                                                     |
| 7902308 | FPGT        | 0.431 fucose-1-phosphate guanylyltransferase   TNNI3 interacting kinase                   |
| 8120961 | MRAP2       | 0.431 melanocortin 2 receptor accessory protein 2                                         |
| 8047403 | CASP10      | 0.431 caspase 10, apoptosis-related cysteine peptidase                                    |
| 7919642 | HIST2H2AB   | 0.431 histone cluster 2, H2ab                                                             |
| 8138789 | JAZF1       | 0.431 JAZF zinc finger 1                                                                  |
| 8127346 | RAB23       | 0.431                                                                                     |
| 7979811 |             | 0.432                                                                                     |
| 8045768 | ARL6IP6     | 0.432 ADP-ribosylation-like factor 6 interacting protein 6                                |
| 8067955 | CXADR       | 0.433 coxsackie virus and adenovirus receptor                                             |
| 7938448 | USP47       | 0.433 ubiquitin specific peptidase 47                                                     |
| 7943162 | C11orf54    | 0.433 chromosome 11 open reading frame 54                                                 |
| 8013305 | ZNF286A     | 0.435 zinc finger protein 286B   zinc finger protein 286A   TBC1 domain family, member 26 |
| 7908421 | TROVE2      | 0.436 TROVE domain family, member 2                                                       |
| 8112388 | TRIM23      | 0.437 tripartite motif-containing 23                                                      |
| 8175393 | ARHGEF6     | 0.437 Rac/Cdc42 guanine nucleotide exchange factor (GEF) 6                                |
| 8106660 | RASGRF2     | 0.437 Ras protein-specific guanine nucleotide-releasing factor 2                          |
| 8142554 | AASS        | 0.437 aminoadipate-semialdehyde synthase                                                  |
| 8004167 | FAM64A      | 0.437 family with sequence similarity 64, member A                                        |
| 8043310 | RMND5A      | 0.438 required for meiotic nuclear division 5 homolog A ( <i>S. cerevisiae</i> )          |
| 8112139 | IL6ST       | 0.438 interleukin 6 signal transducer (gp130, oncostatin M receptor)                      |
| 8023727 | DSEL        | 0.438 dermatan sulfate epimerase-like                                                     |
| 8136473 | TRIM24      | 0.438 tripartite motif-containing 24                                                      |
| 8149825 | STC1        | 0.438 stanniocalcin 1                                                                     |
| 8110803 | CLPTM1L     | 0.439 CLPTM1-like                                                                         |
| 7933105 | ZNF25       | 0.439 zinc finger protein 25                                                              |
| 8148158 | WDR67       | 0.439 WD repeat domain 67                                                                 |
| 7972055 | KCTD12      | 0.439 potassium channel tetramerisation domain containing 12                              |
| 7918634 | PHTF1       | 0.439 putative homeodomain transcription factor 1                                         |
| 8101143 | NUP54       | 0.439 nucleoporin 54kDa                                                                   |
| 7938544 | TEAD1       | 0.439 TEA domain family member 1 (SV40 transcriptional enhancer factor)                   |

|         |           |       |                                                                                                                  |
|---------|-----------|-------|------------------------------------------------------------------------------------------------------------------|
| 8079662 | ARIH2     | 0.439 | ariadne homolog 2 (Drosophila)                                                                                   |
| 8078650 | CTDSPL    | 0.439 | CTD (carboxy-terminal domain, RNA polymerase II, polypeptide A) small phosphatase-like                           |
| 8066074 | DSN1      | 0.440 |                                                                                                                  |
| 8020814 | RNF138    | 0.440 | ring finger protein 138                                                                                          |
| 8137232 | GIMAP8    | 0.440 | GTPase, IMAP family member 8                                                                                     |
| 8152222 | AZIN1     | 0.440 | antizyme inhibitor 1                                                                                             |
| 8113039 | MEF2C     | 0.441 | myocyte enhancer factor 2C                                                                                       |
| 8034772 | ASF1B     | 0.441 | ASF1 anti-silencing function 1 homolog B ( <i>S. cerevisiae</i> )                                                |
| 8172043 | SRPX      | 0.441 | sushi-repeat-containing protein, X-linked                                                                        |
| 8044278 | CCDC138   | 0.442 | coiled-coil domain containing 138                                                                                |
| 7960340 | FOXM1     | 0.442 | forkhead box M1                                                                                                  |
| 7966425 |           | 0.442 |                                                                                                                  |
| 8012475 | MYH10     | 0.442 | myosin, heavy chain 10, non-muscle                                                                               |
| 8155214 | MELK      | 0.442 | maternal embryonic leucine zipper kinase                                                                         |
| 8146794 | PREX2     | 0.442 | phosphatidylinositol-3,4,5-trisphosphate-dependent Rac exchange factor 2                                         |
| 8174103 | GK        | 0.442 | glycerol kinase   glycerol kinase 3 pseudogene                                                                   |
| 8130374 | FBXO5     | 0.443 | F-box protein 5                                                                                                  |
| 8114425 | CDC25C    | 0.443 | cell division cycle 25 homolog C ( <i>S. pombe</i> )   family with sequence similarity 53, member C              |
| 8045423 | SNORA40   | 0.444 | small nucleolar RNA, H/ACA box 40   TATA box binding protein (TBP)-associated factor, RNA polymerase I, D, 41kDa |
| 8090577 | MBD4      | 0.444 | methyl-CpG binding domain protein 4                                                                              |
| 8108744 | PCDHB14   | 0.444 | protocadherin beta 14                                                                                            |
| 7902023 | RAVER2    | 0.445 | ribonucleoprotein, PTB-binding 2                                                                                 |
| 7994109 | PLK1      | 0.445 | polo-like kinase 1 (Drosophila)                                                                                  |
| 7900699 | CDC20     | 0.446 | cell division cycle 20 homolog ( <i>S. cerevisiae</i> )                                                          |
| 8107408 | KCNN2     | 0.446 | potassium intermediate/small conductance calcium-activated channel, subfamily N, member 2                        |
| 8081362 | CEP97     | 0.447 | centrosomal protein 97kDa                                                                                        |
| 8174092 | ARMCX2    | 0.447 | armadillo repeat containing, X-linked 2                                                                          |
| 7896759 | LOC643837 | 0.447 |                                                                                                                  |
| 8034122 | SPC24     | 0.447 |                                                                                                                  |
| 8084100 | USP13     | 0.448 | ubiquitin specific peptidase 13 (isopeptidase T-3)                                                               |

|         |              |       |                                                                                                                                                  |
|---------|--------------|-------|--------------------------------------------------------------------------------------------------------------------------------------------------|
| 7934122 | SAR1A        | 0.448 | SAR1 homolog A ( <i>S. cerevisiae</i> )                                                                                                          |
| 8143663 | EZH2         | 0.448 | enhancer of zeste homolog 2 ( <i>Drosophila</i> )                                                                                                |
| 7908351 | PLA2G4A      | 0.449 | phospholipase A2, group IVA (cytosolic, calcium-dependent)                                                                                       |
| 8147891 | PKHD1L1      | 0.449 | polycystic kidney and hepatic disease 1 (autosomal recessive)-like 1                                                                             |
| 7950374 | P4HA3        | 0.451 | prolyl 4-hydroxylase, alpha polypeptide III                                                                                                      |
| 8060736 |              | 0.451 |                                                                                                                                                  |
| 8021147 | IER3IP1      | 0.451 | immediate early response 3 interacting protein 1                                                                                                 |
| 8001658 | C16orf80     | 0.452 | chromosome 16 open reading frame 80                                                                                                              |
| 7931832 | AKR1C2       | 0.452 | aldo-keto reductase family 1, member C2 (dihydrodiol dehydrogenase 2; bile acid binding protein; 3-alpha hydroxysteroid dehydrogenase, type III) |
| 8138108 | KDEL2        | 0.452 | KDEL (Lys-Asp-Glu-Leu) endoplasmic reticulum protein retention receptor 2   diacylglycerol lipase, beta                                          |
| 8151824 | RAD54B       | 0.452 | RAD54 homolog B ( <i>S. cerevisiae</i> )                                                                                                         |
| 8171381 | FANCB        | 0.452 | Fanconi anemia, complementation group B                                                                                                          |
| 7962441 | TWF1         | 0.452 | twinfilin, actin-binding protein, homolog 1 ( <i>Drosophila</i> )                                                                                |
| 8052845 | TIA1         | 0.453 |                                                                                                                                                  |
| 8100085 | GNPDA2       | 0.453 | glucosamine-6-phosphate deaminase 2                                                                                                              |
| 8055913 | PRPF40A      | 0.453 | PRP40 pre-mRNA processing factor 40 homolog A ( <i>S. cerevisiae</i> )                                                                           |
| 8128329 | C6orf167     | 0.454 | chromosome 6 open reading frame 167                                                                                                              |
| 8113666 | SEMA6A       | 0.454 | sema domain, transmembrane domain (TM), and cytoplasmic domain, (semaphorin) 6A                                                                  |
| 8106280 | HMGCR        | 0.455 | 3-hydroxy-3-methylglutaryl-CoA reductase   3-hydroxy-3-methylglutaryl-Coenzyme A reductase                                                       |
| 8140620 | PCLO         | 0.455 | piccolo (presynaptic cytomatrix protein)                                                                                                         |
| 7985662 | PDE8A        | 0.455 | phosphodiesterase 8A                                                                                                                             |
| 8068761 | ABCG1        | 0.455 | ATP-binding cassette, sub-family G (WHITE), member 1                                                                                             |
| 7934920 | LIPA         | 0.456 | lipase A, lysosomal acid, cholesterol esterase                                                                                                   |
| 7979260 | GMFB         | 0.456 | glia maturation factor, beta                                                                                                                     |
| 8104022 | PDLIM3       | 0.456 | PDZ and LIM domain 3                                                                                                                             |
| 7968484 | BRCA2        | 0.457 | breast cancer 2, early onset                                                                                                                     |
| 7991777 | LOC100129478 | 0.457 | chromosome 4 open reading frame 46                                                                                                               |
| 8133030 | GABPA        | 0.457 | GA binding protein transcription factor, alpha subunit 60kDa                                                                                     |
| 7926677 | OTUD1        | 0.457 | OTU domain containing 1                                                                                                                          |

|         |           |       |                                                                                                                      |
|---------|-----------|-------|----------------------------------------------------------------------------------------------------------------------|
| 8055952 | NR4A2     | 0.458 | nuclear receptor subfamily 4, group A, member 2                                                                      |
| 8103695 | MFAP3L    | 0.458 | microfibrillar-associated protein 3-like                                                                             |
| 7983379 |           | 0.458 |                                                                                                                      |
| 7928318 | CCDC109A  | 0.459 | coiled-coil domain containing 109A                                                                                   |
| 7916167 | ORC1L     | 0.459 | origin recognition complex, subunit 1-like (yeast)                                                                   |
| 7980983 | MOAP1     | 0.459 | modulator of apoptosis 1                                                                                             |
| 8017964 | ABCA6     | 0.460 | ATP-binding cassette, sub-family A (ABC1), member 6                                                                  |
| 8071212 | CDC45L    | 0.460 | cell division cycle 45 homolog ( <i>S. cerevisiae</i> )   CDC45 cell division cycle 45-like ( <i>S. cerevisiae</i> ) |
| 7942964 | TMEM135   | 0.460 | transmembrane protein 135                                                                                            |
| 7915682 | ZSWIM5    | 0.461 | zinc finger, SWIM-type containing 5                                                                                  |
| 8013860 | MYO18A    | 0.461 | myosin XVIIIa   TGFβ1-induced anti-apoptotic factor 1                                                                |
| 8081758 | GRAMD1C   | 0.461 | GRAM domain containing 1C                                                                                            |
| 7995354 | ORC6L     | 0.461 | origin recognition complex, subunit 6 like (yeast)                                                                   |
| 8083876 | SKIL      | 0.461 | SKI-like oncogene                                                                                                    |
| 7937915 | RRM1      | 0.461 | ribonucleotide reductase M1                                                                                          |
| 8124388 | HIST1H3B  | 0.461 | histone cluster 1, H3b                                                                                               |
| 8129763 | FAM54A    | 0.461 | family with sequence similarity 54, member A                                                                         |
| 8107375 | YTHDC2    | 0.461 | YTH domain containing 2                                                                                              |
| 8090898 | STAG1     | 0.461 | stromal antigen 1                                                                                                    |
| 8052626 | VPS54     | 0.462 | vacuolar protein sorting 54 homolog ( <i>S. cerevisiae</i> )                                                         |
| 7968835 | AKAP11    | 0.462 | A kinase (PRKA) anchor protein 11                                                                                    |
| 8146717 | SGK3      | 0.462 | serum/glucocorticoid regulated kinase family, member 3   chromosome 8 open reading frame 44                          |
| 8046555 | HOXD4     | 0.463 | homeobox D4                                                                                                          |
| 7987642 | NDUFAF1   | 0.463 | NADH dehydrogenase (ubiquinone) 1 alpha subcomplex, assembly factor 1                                                |
| 7955441 | METTL7A   | 0.463 | methyltransferase like 7A                                                                                            |
| 8041383 | LTBP1     | 0.463 | latent transforming growth factor beta binding protein 1                                                             |
| 8044766 | INSIG2    | 0.463 | insulin induced gene 2                                                                                               |
| 7974166 | FANCM     | 0.464 | Fanconi anemia, complementation group M                                                                              |
| 8109912 | KCNIP1    | 0.464 | Kv channel interacting protein 1                                                                                     |
| 7953943 | GABARAPL1 | 0.464 | GABA(A) receptor-associated protein like 1                                                                           |
| 8098512 | C4orf41   | 0.464 | chromosome 4 open reading frame 41                                                                                   |

|         |            |       |                                                                                                                                                                                           |
|---------|------------|-------|-------------------------------------------------------------------------------------------------------------------------------------------------------------------------------------------|
| 7969243 | CKAP2      | 0.465 | cytoskeleton associated protein 2                                                                                                                                                         |
| 8014115 | MYO1D      | 0.465 | myosin ID                                                                                                                                                                                 |
| 8033362 | INSR       | 0.465 | insulin receptor                                                                                                                                                                          |
| 7933821 | RHOBTB1    | 0.466 | Rho-related BTB domain containing 1                                                                                                                                                       |
| 8142697 | POT1       | 0.466 |                                                                                                                                                                                           |
| 7978748 | FBXO33     | 0.466 | F-box protein 33                                                                                                                                                                          |
| 8144228 | FLJ36840   | 0.466 | hypothetical LOC645524                                                                                                                                                                    |
| 7962358 | YAF2       | 0.466 | YY1 associated factor 2                                                                                                                                                                   |
| 7932326 | CUBN       | 0.466 | cubilin (intrinsic factor-cobalamin receptor)                                                                                                                                             |
| 7923516 | CYB5R1     | 0.467 | cytochrome b5 reductase 1                                                                                                                                                                 |
| 7989224 | ADAM10     | 0.467 | ADAM metallopeptidase domain 10                                                                                                                                                           |
| 8106931 | ANKRD32    | 0.468 | ankyrin repeat domain 32                                                                                                                                                                  |
| 7956856 | MSRB3      | 0.468 | methionine sulfoxide reductase B3                                                                                                                                                         |
| 8086028 | GLB1       | 0.468 | galactosidase, beta 1                                                                                                                                                                     |
| 8061579 | TPX2       | 0.468 |                                                                                                                                                                                           |
| 7902425 | ST6GALNAC3 | 0.468 | ST6 (alpha-N-acetyl-neuraminyl-2,3-beta-galactosyl-1,3)-N-acetylgalactosaminide alpha-2,6-sialyltransferase 3                                                                             |
| 8125825 | NUDT3      | 0.468 | nudix (nucleoside diphosphate linked moiety X)-type motif 3                                                                                                                               |
| 8009096 | ACE        | 0.469 | angiotensin I converting enzyme (peptidyl-dipeptidase A) 1                                                                                                                                |
| 8175531 | CDR1       | 0.469 | cerebellar degeneration-related protein 1, 34kDa   YTH domain containing 2                                                                                                                |
| 8121275 |            | 0.469 |                                                                                                                                                                                           |
| 8009457 | PRKAR1A    | 0.469 | protein kinase, cAMP-dependent, regulatory, type I, alpha (tissue specific extinguisher 1)                                                                                                |
| 8112841 | HOMER1     | 0.470 | homer homolog 1 (Drosophila)                                                                                                                                                              |
| 8052355 | EFEMP1     | 0.470 | EGF-containing fibulin-like extracellular matrix protein 1                                                                                                                                |
| 8148501 | PTP4A3     | 0.470 | protein tyrosine phosphatase type IVA, member 3                                                                                                                                           |
| 8069565 | BTG3       | 0.470 | BTG family, member 3                                                                                                                                                                      |
| 8112807 | ARSB       | 0.470 | arylsulfatase B                                                                                                                                                                           |
| 7978628 | PPP2R3C    | 0.470 | protein phosphatase 2 (formerly 2A), regulatory subunit B", gamma                                                                                                                         |
| 7970507 |            | 0.470 |                                                                                                                                                                                           |
| 7919591 |            | 0.470 | family with sequence similarity 72, member D   family with sequence similarity 72, member A   family with sequence similarity 72, member B   family with sequence similarity 72, member C |



|         |           |                                                                                                    |
|---------|-----------|----------------------------------------------------------------------------------------------------|
| 8089372 | KIAA1524  | 0.470                                                                                              |
| 8078834 | WDR48     | 0.471 WD repeat domain 48                                                                          |
| 8130732 | BRP44L    | 0.471 brain protein 44-like                                                                        |
| 8110589 | CNOT6     | 0.471 CCR4-NOT transcription complex, subunit 6                                                    |
| 7904048 |           | 0.471                                                                                              |
| 7915926 | STIL      | 0.472 SCL/TAL1 interrupting locus                                                                  |
| 8046590 | HNRNPA3   | 0.472 heterogeneous nuclear ribonucleoprotein A3   heterogeneous nuclear ribonucleoprotein A3      |
| 8151890 | TP53INP1  | 0.472 tumor protein p53 inducible nuclear protein 1                                                |
| 7911301 | PGBD2     | 0.472 piggyBac transposable element derived 2                                                      |
| 8120833 | SH3BGL2   | 0.473 SH3 domain binding glutamic acid-rich protein like 2                                         |
| 8083941 | ECT2      | 0.473 epithelial cell transforming sequence 2 oncogene                                             |
| 7962013 | ERGIC2    | 0.473 ERGIC and golgi 2                                                                            |
| 8048864 | CCL20     | 0.473 chemokine (C-C motif) ligand 20                                                              |
| 7904106 | MAGI3     | 0.473 membrane associated guanylate kinase, WW and PDZ domain containing 3                         |
| 8070010 | SYNJ1     | 0.473 synaptojanin 1                                                                               |
| 8098103 | FNIP2     | 0.473 folliculin interacting protein 2                                                             |
| 7903032 | MTF2      | 0.474 metal response element binding transcription factor 2                                        |
| 8098041 | TMEM144   | 0.474 transmembrane protein 144                                                                    |
| 7959408 | KNTC1     | 0.474 kinetochore associated 1                                                                     |
| 8049435 | SH3BP4    | 0.474 SH3-domain binding protein 4                                                                 |
| 7996219 | NDRG4     | 0.474 NDRG family member 4                                                                         |
| 8163775 | MEGF9     | 0.474 multiple EGF-like-domains 9                                                                  |
| 8173206 | LOC645251 | 0.474                                                                                              |
| 7924096 | NEK2      | 0.475 NIMA (never in mitosis gene a)-related kinase 2                                              |
| 7905731 |           | 0.475                                                                                              |
| 8046680 | PLEKHA3   | 0.475 pleckstrin homology domain containing, family A (phosphoinositide binding specific) member 3 |
| 8098328 | GALNT7    | 0.475 UDP-N-acetyl-alpha-D-galactosamine:polypeptide N-acetylgalactosaminyltransferase 7 (GalNAc-  |
| 7974870 | SNAPC1    | 0.475 small nuclear RNA activating complex, polypeptide 1, 43kDa                                   |
| 8010354 | GAA       | 0.475 glucosidase, alpha; acid                                                                     |
| 7995907 | CETP      | 0.475 cholesteryl ester transfer protein, plasma                                                   |
| 8083352 | SELT      | 0.476 selenoprotein T                                                                              |

|         |              |                                                                                               |
|---------|--------------|-----------------------------------------------------------------------------------------------|
| 8174664 |              | 0.476                                                                                         |
| 8106923 | NR2F1        | 0.476 nuclear receptor subfamily 2, group F, member 1                                         |
| 8102389 | C4orf21      | 0.476 chromosome 4 open reading frame 21                                                      |
| 7948995 | ATL3         | 0.476 atlastin GTPase 3                                                                       |
| 7900167 | CDCA8        | 0.476 cell division cycle associated 8                                                        |
| 8130811 | C6orf123     | 0.477 chromosome 6 open reading frame 123   hypothetical LOC441179                            |
| 8130982 | C6orf123     | 0.477 chromosome 6 open reading frame 123   hypothetical LOC441179                            |
| 8026381 | LOC100129118 | 0.477 similar to transmembrane protein 167A                                                   |
| 7962212 | PKP2         | 0.477 plakophilin 2                                                                           |
| 7978407 | PRKD1        | 0.477 protein kinase D1                                                                       |
| 8070341 | BRWD1        | 0.478 bromodomain and WD repeat domain containing 1                                           |
| 8040440 | GEN1         | 0.478 Gen homolog 1, endonuclease ( <i>Drosophila</i> )                                       |
| 8121031 | SLC35A1      | 0.478 solute carrier family 35 (CMP-sialic acid transporter), member A1                       |
| 7927082 | HSD17B7P2    | 0.478 hydroxysteroid (17-beta) dehydrogenase 7 pseudogene 2                                   |
| 7968658 | EXOSC8       | 0.478 exosome component 8                                                                     |
| 8122222 | PDE7B        | 0.478 phosphodiesterase 7B                                                                    |
| 7978492 | HEATR5A      | 0.478 HEAT repeat containing 5A                                                               |
| 8113083 | FAM172A      | 0.479 family with sequence similarity 172, member A                                           |
| 7977077 | MARK3        | 0.479 MAP/microtubule affinity-regulating kinase 3                                            |
| 8101260 | ANTXR2       | 0.479 anthrax toxin receptor 2                                                                |
| 7976621 | VRK1         | 0.479 vaccinia related kinase 1                                                               |
| 8117194 | MRS2         | 0.479                                                                                         |
| 7966878 | CIT          | 0.480 citron (rho-interacting, serine/threonine kinase 21)                                    |
| 8131881 | C7orf46      | 0.480 chromosome 7 open reading frame 46                                                      |
| 7903049 | CCDC18       | 0.480 coiled-coil domain containing 18                                                        |
| 8134091 | CLDN12       | 0.481 claudin 12                                                                              |
| 8112327 | CKS1B        | 0.481 CDC28 protein kinase regulatory subunit 1B   CDC28 protein kinase regulatory subunit 1B |
| 8089875 | POLQ         | 0.481 polymerase (DNA directed), theta                                                        |
| 8027260 | ZNF486       | 0.482 zinc finger protein 486   zinc finger protein 93                                        |
| 8056102 | CD302        | 0.482                                                                                         |
| 8124524 | HIST1H2AK    | 0.482 histone cluster 1, H2ak   histone cluster 1, H2bn                                       |

|         |               |       |                                                                                               |
|---------|---------------|-------|-----------------------------------------------------------------------------------------------|
| 8109938 | RANBP17       | 0.482 | RAN binding protein 17                                                                        |
| 7949412 | LTBP3         | 0.482 | latent transforming growth factor beta binding protein 3                                      |
| 8058063 | RFTN2         | 0.483 | raftlin family member 2                                                                       |
| 7967870 | RP11-484H12.c | 0.483 |                                                                                               |
| 8066136 | RBL1          | 0.484 | retinoblastoma-like 1 (p107)                                                                  |
| 8111922 | LOC648987     | 0.484 |                                                                                               |
| 8059687 |               | 0.484 |                                                                                               |
| 8000003 | THUMPD1       | 0.484 | THUMP domain containing 1                                                                     |
| 7936637 | SNORA19       | 0.484 | small nucleolar RNA, H/ACA box 19                                                             |
| 7988970 | KIAA1370      | 0.484 |                                                                                               |
| 7957737 | TMPO          | 0.484 | thymopoietin                                                                                  |
| 7979250 | CNIH          | 0.485 | cornichon homolog (Drosophila)                                                                |
| 8081375 | FAM55C        | 0.485 | family with sequence similarity 55, member C                                                  |
| 8156199 | DAPK1         | 0.485 | death-associated protein kinase 1                                                             |
| 8122982 | ZDHHC14       | 0.485 | zinc finger, DHHC-type containing 14                                                          |
| 8163964 | PDCL          | 0.485 | phosducin-like                                                                                |
| 8141395 | MCM7          | 0.485 | minichromosome maintenance complex component 7                                                |
| 7962489 |               | 0.486 | pleckstrin homology domain containing, family A (phosphoinositide binding specific) member 9  |
|         | PLEKHA9       |       | pleckstrin homology domain containing, family A (phosphoinositide binding specific) member 8  |
| 8058695 | BARD1         | 0.486 | BRCA1 associated RING domain 1                                                                |
| 7961503 | C12orf69      | 0.486 | chromosome 12 open reading frame 69                                                           |
| 8109639 | PTTG1         | 0.487 | pituitary tumor-transforming 1                                                                |
| 7901052 | SNORD38B      | 0.487 | small nucleolar RNA, C/D box 38B                                                              |
| 7899627 | TINAGL1       | 0.487 | tubulointerstitial nephritis antigen-like 1                                                   |
| 8083119 | RNF7          | 0.487 | ring finger protein 7                                                                         |
| 8172022 | TMEM47        | 0.487 | transmembrane protein 47                                                                      |
| 8176276 | ATRX          | 0.487 | alpha thalassemia/mental retardation syndrome X-linked (RAD54 homolog, <i>S. cerevisiae</i> ) |
| 8113433 | EFNA5         | 0.487 | ephrin-A5                                                                                     |
| 7932964 | C1D           | 0.488 |                                                                                               |
| 8038952 | ZNF616        | 0.488 | zinc finger protein 616                                                                       |
| 7957536 | NUDT4         | 0.488 | nudix (nucleoside diphosphate linked moiety X)-type motif 4                                   |

|         |           |       |                                                                                                                                                                        |
|---------|-----------|-------|------------------------------------------------------------------------------------------------------------------------------------------------------------------------|
| 7903022 | SNORD21   | 0.488 | small nucleolar RNA, C/D box 21                                                                                                                                        |
| 7960730 | LPCAT3    | 0.489 | lysophosphatidylcholine acyltransferase 3                                                                                                                              |
| 8061171 | POLR3F    | 0.489 | polymerase (RNA) III (DNA directed) polypeptide F, 39 kDa   chromosome 20 open reading frame                                                                           |
| 7903227 | PALMD     | 0.489 | palmdelphin                                                                                                                                                            |
| 8124040 | ATXN1     | 0.489 | ataxin 1                                                                                                                                                               |
| 7963631 | RARG      | 0.489 | retinoic acid receptor, gamma                                                                                                                                          |
| 8086077 | CLASP2    | 0.489 | cytoplasmic linker associated protein 2                                                                                                                                |
| 8032509 | GNG7      | 0.490 | guanine nucleotide binding protein (G protein), gamma 7                                                                                                                |
| 8078386 | GPD1L     | 0.490 | glycerol-3-phosphate dehydrogenase 1-like                                                                                                                              |
| 8044804 | DBI       | 0.490 | diazepam binding inhibitor (GABA receptor modulator, acyl-CoA binding protein)   diazepam binding inhibitor (GABA receptor modulator, acyl-Coenzyme A binding protein) |
| 7995580 |           | 0.490 |                                                                                                                                                                        |
| 7993167 | ATF7IP2   | 0.490 | activating transcription factor 7 interacting protein 2                                                                                                                |
| 8110055 | CPEB4     | 0.490 | cytoplasmic polyadenylation element binding protein 4                                                                                                                  |
| 7965956 | NFYB      | 0.491 | nuclear transcription factor Y, beta                                                                                                                                   |
| 7973084 | ANG       | 0.491 | angiogenin, ribonuclease, RNase A family, 5   ribonuclease, RNase A family, 4                                                                                          |
| 7982663 | BUB1B     | 0.491 | budding uninhibited by benzimidazoles 1 homolog beta (yeast)   p21 protein (Cdc42/Rac)-activated kinase 6                                                              |
| 7931754 | IDI1      | 0.491 | isopentenyl-diphosphate delta isomerase 1                                                                                                                              |
| 8107164 | HISPPD1   | 0.492 | diphosphoinositol pentakisphosphate kinase 2   histidine acid phosphatase domain containing 1                                                                          |
| 7930614 | NHLRC2    | 0.492 | NHL repeat containing 2                                                                                                                                                |
| 8022009 | METTL4    | 0.492 | methyltransferase like 4                                                                                                                                               |
| 8112376 | CENPK     | 0.492 | centromere protein K                                                                                                                                                   |
| 8105579 | IPO11     | 0.493 | leucine rich repeat containing 70   importin 11                                                                                                                        |
| 7902874 | LRRC8C    | 0.493 | leucine rich repeat containing 8 family, member C                                                                                                                      |
| 7903565 | GPSM2     | 0.493 | G-protein signaling modulator 2 (AGS3-like, C. elegans)   chloride channel CLIC-like 1                                                                                 |
| 7997272 | GABARAPL2 | 0.493 | GABA(A) receptor-associated protein-like 2                                                                                                                             |
| 7928189 | UNC5B     | 0.493 | unc-5 homolog B (C. elegans)                                                                                                                                           |
| 8112967 | TMEM167A  | 0.493 | transmembrane protein 167A                                                                                                                                             |
| 8130176 | ULBP3     | 0.494 | UL16 binding protein 3                                                                                                                                                 |
| 7932966 | ITGB1     | 0.494 | integrin, beta 1 (fibronectin receptor, beta polypeptide, antigen CD29 includes MDF2, MSK12)                                                                           |

|         |          |       |                                                                                                    |
|---------|----------|-------|----------------------------------------------------------------------------------------------------|
| 8098348 | KIAA1712 | 0.495 | KIAA1712   F-box protein 8                                                                         |
| 8037205 | CEACAM1  | 0.495 | carcinoembryonic antigen-related cell adhesion molecule 1 (biliary glycoprotein)                   |
| 8105647 | C5orf44  | 0.496 | chromosome 5 open reading frame 44                                                                 |
| 8130474 | SERAC1   | 0.496 | serine active site containing 1                                                                    |
| 7924107 | LPGAT1   | 0.496 | lysophosphatidylglycerol acyltransferase 1                                                         |
| 7969129 | PHF11    | 0.496 | PHD finger protein 11                                                                              |
| 8055426 | MCM6     | 0.496 | minichromosome maintenance complex component 6                                                     |
| 7969330 | PCDH17   | 0.496 | protocadherin 17                                                                                   |
| 7961026 | OVOS     | 0.497 | ovostatin   ovostatin 2   similar to hCG38149                                                      |
| 7962327 | SLC2A13  | 0.497 | solute carrier family 2 (facilitated glucose transporter), member 13                               |
| 7980438 | SPTLC2   | 0.497 | serine palmitoyltransferase, long chain base subunit 2                                             |
| 7931168 | ACADSB   | 0.497 | acyl-CoA dehydrogenase, short/branched chain   acyl-Coenzyme A dehydrogenase, short/branched chain |
| 7953873 | OVOS2    | 0.497 | ovostatin   ovostatin 2   similar to hCG38149                                                      |
| 7937039 | EBF3     | 0.498 | early B-cell factor 3                                                                              |
| 7957417 | TMTC2    | 0.498 | transmembrane and tetratricopeptide repeat containing 2                                            |
| 8009476 | MAP2K6   | 0.498 | mitogen-activated protein kinase kinase 6                                                          |
| 8104035 | SORBS2   | 0.498 | sorbin and SH3 domain containing 2                                                                 |
| 7910398 | SPHAR    | 0.498 | RAB4A, member RAS oncogene family   S-phase response (cyclin related)                              |
| 8173208 | SPIN4    | 0.498 | spindlin family, member 4                                                                          |
| 8022251 | PPP4R1   | 0.498 | protein phosphatase 4, regulatory subunit 1                                                        |
| 8047692 | CTLA4    | 0.498 | cytotoxic T-lymphocyte-associated protein 4                                                        |
| 8105153 | NNT      | 0.499 | nicotinamide nucleotide transhydrogenase                                                           |
| 8001178 | C16orf87 | 0.499 | chromosome 16 open reading frame 87                                                                |
| 7933204 | C10orf10 | 0.499 | chromosome 10 open reading frame 10                                                                |
| 8152606 | SNTB1    | 0.499 | syntrophin, beta 1 (dystrophin-associated protein A1, 59kDa, basic component 1)                    |
| 8144281 | ARHGEF10 | 0.499 | Rho guanine nucleotide exchange factor (GEF) 10                                                    |
| 8016463 | HOXB6    | 0.499 | homeobox B6                                                                                        |
| 8138977 | DPY19L1  | 0.500 | dpy-19-like 1 (C. elegans)                                                                         |

## Upregulated genes

| Probe ID | Gene Symbol | Fold Change<br>(siProx1/siContro) | Gene Description                                                                                                                                                                                                                                                                                                                                                                                                                                                                                                                                                                                                                                                                                                 |
|----------|-------------|-----------------------------------|------------------------------------------------------------------------------------------------------------------------------------------------------------------------------------------------------------------------------------------------------------------------------------------------------------------------------------------------------------------------------------------------------------------------------------------------------------------------------------------------------------------------------------------------------------------------------------------------------------------------------------------------------------------------------------------------------------------|
| 8100310  |             | 8.816                             |                                                                                                                                                                                                                                                                                                                                                                                                                                                                                                                                                                                                                                                                                                                  |
| 8151605  | REXO1L1     | 8.204                             | REX1, RNA exonuclease 1 homolog ( <i>S. cerevisiae</i> )-like 1                                                                                                                                                                                                                                                                                                                                                                                                                                                                                                                                                                                                                                                  |
| 8151613  |             | 8.204                             | REX1, RNA exonuclease 1 homolog ( <i>S. cerevisiae</i> )-like 1                                                                                                                                                                                                                                                                                                                                                                                                                                                                                                                                                                                                                                                  |
| 8151617  | REXO1L1     | 8.204                             | REX1, RNA exonuclease 1 homolog ( <i>S. cerevisiae</i> )-like 2 (pseudogene)   REX1, RNA exonuclease 1 homolog ( <i>S. cerevisiae</i> )-like 1                                                                                                                                                                                                                                                                                                                                                                                                                                                                                                                                                                   |
| 8151621  | REXO1L1     | 8.204                             | REX1, RNA exonuclease 1 homolog ( <i>S. cerevisiae</i> )-like 1                                                                                                                                                                                                                                                                                                                                                                                                                                                                                                                                                                                                                                                  |
| 8151625  | REXO1L1     | 8.204                             | REX1, RNA exonuclease 1 homolog ( <i>S. cerevisiae</i> )-like 1                                                                                                                                                                                                                                                                                                                                                                                                                                                                                                                                                                                                                                                  |
| 8072678  | HMOX1       | 8.035                             | heme oxygenase (decycling) 1                                                                                                                                                                                                                                                                                                                                                                                                                                                                                                                                                                                                                                                                                     |
| 7970392  |             | 7.810                             |                                                                                                                                                                                                                                                                                                                                                                                                                                                                                                                                                                                                                                                                                                                  |
| 8100308  |             | 7.456                             |                                                                                                                                                                                                                                                                                                                                                                                                                                                                                                                                                                                                                                                                                                                  |
| 8095005  | CWH43       | 6.660                             | cell wall biogenesis 43 C-terminal homolog ( <i>S. cerevisiae</i> )                                                                                                                                                                                                                                                                                                                                                                                                                                                                                                                                                                                                                                              |
| 8094134  | USP17L6P    | 6.480                             | ubiquitin specific peptidase 17-like 6 (pseudogene)   ubiquitin specific peptidase 17                                                                                                                                                                                                                                                                                                                                                                                                                                                                                                                                                                                                                            |
| 8134429  |             | 5.388                             |                                                                                                                                                                                                                                                                                                                                                                                                                                                                                                                                                                                                                                                                                                                  |
| 7912802  | LOC440570   | 5.317                             | hypothetical LOC100132147   hypothetical LOC440570                                                                                                                                                                                                                                                                                                                                                                                                                                                                                                                                                                                                                                                               |
| 8149953  |             | 5.279                             |                                                                                                                                                                                                                                                                                                                                                                                                                                                                                                                                                                                                                                                                                                                  |
| 8161444  |             | 5.109                             |                                                                                                                                                                                                                                                                                                                                                                                                                                                                                                                                                                                                                                                                                                                  |
| 7982084  |             | 4.885                             | small nucleolar RNA, C/D box 115-11   small nucleolar RNA, C/D box 115-12   small nucleolar RNA, C/D box 115-26   small nucleolar RNA, C/D box 115-29   small nucleolar RNA, C/D box 115-36   small nucleolar RNA, C/D box 115-39   small nucleolar RNA, C/D box 115-43   small nucleolar RNA, C/D box 115-9   small nucleolar RNA, C/D box 115-41   small nucleolar RNA, C/D box 115-22   small nucleolar RNA, C/D box 115-16   small nucleolar RNA, C/D box 115-14   small nucleolar RNA, C/D box 115-6   small nucleolar RNA, C/D box 115-38   small nucleolar RNA, C/D box 115-44   small nucleolar RNA, C/D box 115-3   small nucleolar RNA, C/D box 115-30   small nuclear ribonucleoprotein polypeptide N |
| 8116571  | SNRPN       | 4.820                             |                                                                                                                                                                                                                                                                                                                                                                                                                                                                                                                                                                                                                                                                                                                  |
| 7970793  | SLC46A3     | 4.626                             | solute carrier family 46, member 3                                                                                                                                                                                                                                                                                                                                                                                                                                                                                                                                                                                                                                                                               |
| 7971461  | LCP1        | 4.582                             | lymphocyte cytosolic protein 1 (L-plastin)                                                                                                                                                                                                                                                                                                                                                                                                                                                                                                                                                                                                                                                                       |
| 7919580  | LOC440570   | 4.554                             |                                                                                                                                                                                                                                                                                                                                                                                                                                                                                                                                                                                                                                                                                                                  |

|         |                    |       |                                                                                                                                                                                                                                                                                                                   |
|---------|--------------------|-------|-------------------------------------------------------------------------------------------------------------------------------------------------------------------------------------------------------------------------------------------------------------------------------------------------------------------|
| 7919596 | LOC440570          | 4.554 |                                                                                                                                                                                                                                                                                                                   |
| 8155493 |                    | 4.518 |                                                                                                                                                                                                                                                                                                                   |
| 8155519 |                    | 4.518 |                                                                                                                                                                                                                                                                                                                   |
| 8155567 |                    | 4.518 |                                                                                                                                                                                                                                                                                                                   |
| 8161429 |                    | 4.518 |                                                                                                                                                                                                                                                                                                                   |
| 8161440 |                    | 4.518 |                                                                                                                                                                                                                                                                                                                   |
| 8167560 |                    | 4.439 | G antigen 12C   G antigen 12D   G antigen 12E   G antigen 12G   G antigen 12H   G antigen 12J   G antigen 13   G antigen 2A   G antigen 2E   G antigen 6   G antigen 8   G antigen 12B   G antigen 10   G antigen 7   G antigen 12I   G antigen 12F   G antigen 2C                                                |
| 8105989 | GAGE13<br>FLJ40092 | 4.431 | similar to Putative POM121-like protein 1-like                                                                                                                                                                                                                                                                    |
| 8151609 | REXO1L1            | 4.375 | REX1, RNA exonuclease 1 homolog ( <i>S. cerevisiae</i> )-like 1   REX1, RNA exonuclease 1 homolog ( <i>S. cerevisiae</i> )-like 2 (pseudogene)                                                                                                                                                                    |
| 7928429 | PLAU               | 4.343 | plasminogen activator, urokinase   chromosome 10 open reading frame 55                                                                                                                                                                                                                                            |
| 8105935 | FLJ40092           | 4.321 | similar to Putative POM121-like protein 1-like                                                                                                                                                                                                                                                                    |
| 7938291 | SNORA3             | 4.159 | small nucleolar RNA, H/ACA box 3<br>small nucleolar RNA, C/D box 115-42   small nucleolar RNA, C/D box 115-6   small nucleolar RNA, C/D box 115-4   small nucleolar RNA, C/D box 115-30   small nucleolar RNA, C/D box 115-34   small nucleolar RNA, C/D box 115-15   small nucleolar RNA, C/D box 115-21   small |
| 7982090 |                    | 3.936 | nucleolar RNA, C/D box 115-12   small nucleolar RNA, C/D box 115-13   small nucleolar RNA, C/D box 115-29   small nucleolar RNA, C/D box 115-36   small nucleolar RNA, C/D box 115-40   small nucleolar RNA, C/D box 115-43   small nucleolar RNA, C/D box 115-5   small nucleolar                                |
| 7982248 | SNORD115-1         | 3.913 | RNA, C/D box 115-9   small nucleolar RNA, C/D box 115-10   small nucleolar RNA, C/D box                                                                                                                                                                                                                           |

|         |       |            |                                                                                                                                                                                                                                                                                                                                                                                                                                                                                                                                                                                                                                                                                                                                                                                                                                                                                                                                                                                                                                                                                                                                                                                                                                                                                                                                                                                                                                                                                                                                                                                                                                                                                                                                                                                                                                                                                                                                                                                                                                                                                                                                                                                                                                                                                                                                                                                                                                   |
|---------|-------|------------|-----------------------------------------------------------------------------------------------------------------------------------------------------------------------------------------------------------------------------------------------------------------------------------------------------------------------------------------------------------------------------------------------------------------------------------------------------------------------------------------------------------------------------------------------------------------------------------------------------------------------------------------------------------------------------------------------------------------------------------------------------------------------------------------------------------------------------------------------------------------------------------------------------------------------------------------------------------------------------------------------------------------------------------------------------------------------------------------------------------------------------------------------------------------------------------------------------------------------------------------------------------------------------------------------------------------------------------------------------------------------------------------------------------------------------------------------------------------------------------------------------------------------------------------------------------------------------------------------------------------------------------------------------------------------------------------------------------------------------------------------------------------------------------------------------------------------------------------------------------------------------------------------------------------------------------------------------------------------------------------------------------------------------------------------------------------------------------------------------------------------------------------------------------------------------------------------------------------------------------------------------------------------------------------------------------------------------------------------------------------------------------------------------------------------------------|
| 7982028 | 3.872 | SNORD115-1 | <p>small nucleolar RNA, C/D box 115-11   small nucleolar RNA, C/D box 115-12   small nucleolar RNA, C/D box 115-29   small nucleolar RNA, C/D box 115-36   small nucleolar RNA, C/D box 115-43   small nucleolar RNA, C/D box 115-5   small nucleolar RNA, C/D box 115-9   small nucleolar RNA, C/D box 115-26   small nucleolar RNA, C/D box 115-22   small nucleolar RNA, C/D box 115-20   small nucleolar RNA, C/D box 115-39   small nucleolar RNA, C/D box 115-3   small nucleolar RNA, C/D box 115-41   small nucleolar RNA, C/D box 115-17   small nucleolar RNA, C/D box 115-18   small nucleolar RNA, C/D box 115-19   small nucleolar RNA, C/D box 115-1   small nucleolar RNA, C/D box 115-13   small nucleolar RNA, C/D box 115-16   small nucleolar RNA, C/D box 115-40   small nucleolar RNA, C/D box 115-44   small nucleolar RNA, C/D box 115-34   small nucleolar RNA, C/D box 115-4   small nucleolar RNA, C/D box 115-42   small nucleolar RNA, C/D box 115-6   small nucleolar RNA, C/D box 115-10   small nucleolar RNA, C/D box 115-14   small nucleolar RNA, C/D box 115-15   small nucleolar RNA, C/D box 115-21   HBII-52-24 snoRNA   small nuclear ribonucleoprotein polypeptide N</p> <p>small nucleolar RNA, C/D box 115-11   small nucleolar RNA, C/D box 115-12   small nucleolar RNA, C/D box 115-29   small nucleolar RNA, C/D box 115-36   small nucleolar RNA, C/D box 115-43   small nucleolar RNA, C/D box 115-5   small nucleolar RNA, C/D box 115-9   small nucleolar RNA, C/D box 115-26   small nucleolar RNA, C/D box 115-22   small nucleolar RNA, C/D box 115-20   small nucleolar RNA, C/D box 115-39   small nucleolar RNA, C/D box 115-3   small nucleolar RNA, C/D box 115-41   small nucleolar RNA, C/D box 115-17   small nucleolar RNA, C/D box 115-18   small nucleolar RNA, C/D box 115-19   small nucleolar RNA, C/D box 115-1   small nucleolar RNA, C/D box 115-13   small nucleolar RNA, C/D box 115-16   small nucleolar RNA, C/D box 115-40   small nucleolar RNA, C/D box 115-44   small nucleolar RNA, C/D box 115-34   small nucleolar RNA, C/D box 115-4   small nucleolar RNA, C/D box 115-42   small nucleolar RNA, C/D box 115-6   small nucleolar RNA, C/D box 115-10   small nucleolar RNA, C/D box 115-14   small nucleolar RNA, C/D box 115-15   small nucleolar RNA, C/D box 115-21   HBII-52-24 snoRNA   small nuclear ribonucleoprotein polypeptide N</p> |
| 7982064 | 3.872 | SNORD115-1 |                                                                                                                                                                                                                                                                                                                                                                                                                                                                                                                                                                                                                                                                                                                                                                                                                                                                                                                                                                                                                                                                                                                                                                                                                                                                                                                                                                                                                                                                                                                                                                                                                                                                                                                                                                                                                                                                                                                                                                                                                                                                                                                                                                                                                                                                                                                                                                                                                                   |





|         |       |                                                                                                                                                                                                                                                                                                                                                                                                                                                                                                                                                                                                                                                        |
|---------|-------|--------------------------------------------------------------------------------------------------------------------------------------------------------------------------------------------------------------------------------------------------------------------------------------------------------------------------------------------------------------------------------------------------------------------------------------------------------------------------------------------------------------------------------------------------------------------------------------------------------------------------------------------------------|
| 7982018 | 3.832 | <p>small nucleolar RNA, C/D box 115-6   small nucleolar RNA, C/D box 115-42   small nucleolar RNA, C/D box 115-4   small nucleolar RNA, C/D box 115-30   small nucleolar RNA, C/D box 115-34   small nucleolar RNA, C/D box 115-15   small nucleolar RNA, C/D box 115-21   small nucleolar RNA, C/D box 115-11   small nucleolar RNA, C/D box 115-16   small nucleolar RNA, C/D box 115-26   small nucleolar RNA, C/D box 115-29   small nucleolar RNA, C/D box 115-36   small nucleolar RNA, C/D box 115-39   small nucleolar RNA, C/D box 115-41   small nucleolar RNA, C/D box 115-43   small nucleolar RNA, C/D box 115-14   HBII-52-24 snoRNA</p> |
|         |       | <p>small nucleolar RNA, C/D box 115-11   small nucleolar RNA, C/D box 115-12   small nucleolar RNA, C/D box 115-22   small nucleolar RNA, C/D box 115-29   small nucleolar RNA, C/D box 115-36   small nucleolar RNA, C/D box 115-43   small nucleolar RNA, C/D box 115-9   small</p>                                                                                                                                                                                                                                                                                                                                                                  |
|         |       | <p>nucleolar RNA, C/D box 115-26   small nucleolar RNA, C/D box 115-3   small nucleolar RNA, C/D box 115-39   small nucleolar RNA, C/D box 115-41   small nucleolar RNA, C/D box 115-16  </p>                                                                                                                                                                                                                                                                                                                                                                                                                                                          |
|         |       | <p>small nucleolar RNA, C/D box 115-44   small nucleolar RNA, C/D box 115-34   small nucleolar RNA, C/D box 115-6   small nucleolar RNA, C/D box 115-7   small nuclear ribonucleoprotein</p>                                                                                                                                                                                                                                                                                                                                                                                                                                                           |
|         |       | <p>small nucleolar RNA, C/D box 115-12   small nucleolar RNA, C/D box 115-5   small nucleolar RNA, C/D box 115-9   small nucleolar RNA, C/D box 115-11   small nucleolar RNA, C/D box</p>                                                                                                                                                                                                                                                                                                                                                                                                                                                              |
|         |       | <p>115-29   small nucleolar RNA, C/D box 115-36   small nucleolar RNA, C/D box 115-43   small nucleolar RNA, C/D box 115-26   small nucleolar RNA, C/D box 115-20   small nucleolar RNA,</p>                                                                                                                                                                                                                                                                                                                                                                                                                                                           |
|         |       | <p>C/D box 115-17   small nucleolar RNA, C/D box 115-18   small nucleolar RNA, C/D box 115-19  </p>                                                                                                                                                                                                                                                                                                                                                                                                                                                                                                                                                    |
| 7982050 | 3.787 | <p>small nucleolar RNA, C/D box 115-1   small nucleolar RNA, C/D box 115-13   small nucleolar RNA, C/D box 115-25   small nucleolar RNA, C/D box 115-40   small nucleolar RNA, C/D box</p>                                                                                                                                                                                                                                                                                                                                                                                                                                                             |
|         |       | <p>115-4   small nucleolar RNA, C/D box 115-42   small nucleolar RNA, C/D box 115-10   small nucleolar RNA, C/D box 115-14   small nucleolar RNA, C/D box 115-15   small nucleolar RNA,</p>                                                                                                                                                                                                                                                                                                                                                                                                                                                            |
|         |       | <p>C/D box 115-21   HBII-52-24 snoRNA   small nuclear ribonucleoprotein polypeptide N</p>                                                                                                                                                                                                                                                                                                                                                                                                                                                                                                                                                              |
|         |       | <p>SNORD115-1</p>                                                                                                                                                                                                                                                                                                                                                                                                                                                                                                                                                                                                                                      |
|         |       | <p>SNRPN</p>                                                                                                                                                                                                                                                                                                                                                                                                                                                                                                                                                                                                                                           |
|         |       | <p>SNORD115-1</p>                                                                                                                                                                                                                                                                                                                                                                                                                                                                                                                                                                                                                                      |



|         |          |       |                                                                                                                                                                                                                                                                                                                                                                                                                                                                                                                                                                                                                                                                                                         |
|---------|----------|-------|---------------------------------------------------------------------------------------------------------------------------------------------------------------------------------------------------------------------------------------------------------------------------------------------------------------------------------------------------------------------------------------------------------------------------------------------------------------------------------------------------------------------------------------------------------------------------------------------------------------------------------------------------------------------------------------------------------|
| 8094122 | USP17L6P | 3.597 | ubiquitin specific peptidase 17   ubiquitin specific peptidase 17-like 6 (pseudogene)   ubiquitin specific peptidase 17-like 2   similar to deubiquitinating enzyme 3                                                                                                                                                                                                                                                                                                                                                                                                                                                                                                                                   |
| 7982046 |          | 3.591 | small nucleolar RNA, C/D box 115-20   small nucleolar RNA, C/D box 115-12   small nucleolar RNA, C/D box 115-5   small nucleolar RNA, C/D box 115-9   small nucleolar RNA, C/D box 115-11   small nucleolar RNA, C/D box 115-22   small nucleolar RNA, C/D box 115-29   small nucleolar RNA, C/D box 115-36   small nucleolar RNA, C/D box 115-43   small nucleolar RNA, C/D box 115-17   small nucleolar RNA, C/D box 115-18   small nucleolar RNA, C/D box 115-19   small nucleolar RNA, C/D box 115-25   small nucleolar RNA, C/D box 115-39   small nucleolar RNA, C/D box 115-10   small nucleolar RNA, C/D box 115-14   small nucleolar RNA, C/D box 115-15   small nucleolar RNA, C/D box 115-21 |
|         | SNRPN    |       |                                                                                                                                                                                                                                                                                                                                                                                                                                                                                                                                                                                                                                                                                                         |
| 8094116 | CPZ      | 3.585 | ubiquitin specific peptidase 17   ubiquitin specific peptidase 17-like 6 (pseudogene)   ubiquitin specific peptidase 17-like 2   similar to deubiquitinating enzyme 3                                                                                                                                                                                                                                                                                                                                                                                                                                                                                                                                   |
| 8094118 | USP17L6P | 3.585 | ubiquitin specific peptidase 17   ubiquitin specific peptidase 17-like 6 (pseudogene)   ubiquitin specific peptidase 17-like 2   similar to deubiquitinating enzyme 3                                                                                                                                                                                                                                                                                                                                                                                                                                                                                                                                   |
| 8094120 | USP17L6P | 3.585 | ubiquitin specific peptidase 17   ubiquitin specific peptidase 17-like 6 (pseudogene)   ubiquitin specific peptidase 17-like 2   similar to deubiquitinating enzyme 3                                                                                                                                                                                                                                                                                                                                                                                                                                                                                                                                   |
| 8094124 | USP17L6P | 3.585 | ubiquitin specific peptidase 17   ubiquitin specific peptidase 17-like 6 (pseudogene)   ubiquitin specific peptidase 17-like 2   similar to deubiquitinating enzyme 3                                                                                                                                                                                                                                                                                                                                                                                                                                                                                                                                   |
| 8094126 | USP17L6P | 3.585 | ubiquitin specific peptidase 17   ubiquitin specific peptidase 17-like 6 (pseudogene)   ubiquitin specific peptidase 17-like 2   similar to deubiquitinating enzyme 3                                                                                                                                                                                                                                                                                                                                                                                                                                                                                                                                   |
| 8094128 | USP17L6P | 3.585 | ubiquitin specific peptidase 17   ubiquitin specific peptidase 17-like 6 (pseudogene)   ubiquitin specific peptidase 17-like 2   similar to deubiquitinating enzyme 3                                                                                                                                                                                                                                                                                                                                                                                                                                                                                                                                   |
| 8094132 | USP17L6P | 3.585 | ubiquitin specific peptidase 17   ubiquitin specific peptidase 17-like 6 (pseudogene)   ubiquitin specific peptidase 17-like 2   similar to deubiquitinating enzyme 3                                                                                                                                                                                                                                                                                                                                                                                                                                                                                                                                   |
| 8066619 | PLTP     | 3.558 | phospholipid transfer protein                                                                                                                                                                                                                                                                                                                                                                                                                                                                                                                                                                                                                                                                           |
| 8112476 | FLJ40092 | 3.557 | similar to Putative POM121-like protein 1-like                                                                                                                                                                                                                                                                                                                                                                                                                                                                                                                                                                                                                                                          |
| 7967702 |          | 3.517 |                                                                                                                                                                                                                                                                                                                                                                                                                                                                                                                                                                                                                                                                                                         |
| 8175016 | APLN     | 3.506 | apelin                                                                                                                                                                                                                                                                                                                                                                                                                                                                                                                                                                                                                                                                                                  |
| 8071042 |          | 3.498 |                                                                                                                                                                                                                                                                                                                                                                                                                                                                                                                                                                                                                                                                                                         |
| 8102787 |          | 3.497 |                                                                                                                                                                                                                                                                                                                                                                                                                                                                                                                                                                                                                                                                                                         |
| 8120602 | OGFRL1   | 3.457 | opioid growth factor receptor-like 1                                                                                                                                                                                                                                                                                                                                                                                                                                                                                                                                                                                                                                                                    |

|         |            |       |                                                                                                                                                                                                                                                                                                                                                                                                                                                                                                                                                                                                                                                                                                                                                                                                                                                                                                                                                                                                                                                                                  |
|---------|------------|-------|----------------------------------------------------------------------------------------------------------------------------------------------------------------------------------------------------------------------------------------------------------------------------------------------------------------------------------------------------------------------------------------------------------------------------------------------------------------------------------------------------------------------------------------------------------------------------------------------------------------------------------------------------------------------------------------------------------------------------------------------------------------------------------------------------------------------------------------------------------------------------------------------------------------------------------------------------------------------------------------------------------------------------------------------------------------------------------|
| 7976642 |            | 3.362 |                                                                                                                                                                                                                                                                                                                                                                                                                                                                                                                                                                                                                                                                                                                                                                                                                                                                                                                                                                                                                                                                                  |
| 7990564 |            | 3.356 |                                                                                                                                                                                                                                                                                                                                                                                                                                                                                                                                                                                                                                                                                                                                                                                                                                                                                                                                                                                                                                                                                  |
| 8054712 | IL1A       | 3.332 | interleukin 1, alpha                                                                                                                                                                                                                                                                                                                                                                                                                                                                                                                                                                                                                                                                                                                                                                                                                                                                                                                                                                                                                                                             |
| 7951271 | MMP1       | 3.318 | matrix metalloproteinase 1 (interstitial collagenase)                                                                                                                                                                                                                                                                                                                                                                                                                                                                                                                                                                                                                                                                                                                                                                                                                                                                                                                                                                                                                            |
| 8051573 | CDC42EP3   | 3.306 | CDC42 effector protein (Rho GTPase binding) 3                                                                                                                                                                                                                                                                                                                                                                                                                                                                                                                                                                                                                                                                                                                                                                                                                                                                                                                                                                                                                                    |
| 7977615 | RNASE1     | 3.250 | ribonuclease, RNase A family, 1 (pancreatic)                                                                                                                                                                                                                                                                                                                                                                                                                                                                                                                                                                                                                                                                                                                                                                                                                                                                                                                                                                                                                                     |
| 7938746 | MRGPRX4    | 3.244 | MAS-related GPR, member X4                                                                                                                                                                                                                                                                                                                                                                                                                                                                                                                                                                                                                                                                                                                                                                                                                                                                                                                                                                                                                                                       |
| 7919155 |            | 3.176 |                                                                                                                                                                                                                                                                                                                                                                                                                                                                                                                                                                                                                                                                                                                                                                                                                                                                                                                                                                                                                                                                                  |
| 7919405 |            | 3.176 |                                                                                                                                                                                                                                                                                                                                                                                                                                                                                                                                                                                                                                                                                                                                                                                                                                                                                                                                                                                                                                                                                  |
| 7982008 | SNORD115-1 | 3.142 | small nucleolar RNA, C/D box 115-1   small nucleolar RNA, C/D box 115-13   small nucleolar RNA, C/D box 115-16   small nucleolar RNA, C/D box 115-12   small nucleolar RNA, C/D box 115-26   small nucleolar RNA, C/D box 115-40   small nucleolar RNA, C/D box 115-41   small nucleolar RNA, C/D box 115-5   small nucleolar RNA, C/D box 115-9   small nuclear small nucleolar RNA, C/D box 115-1   small nucleolar RNA, C/D box 115-13   small nucleolar RNA, C/D box 115-16   small nucleolar RNA, C/D box 115-11   small nucleolar RNA, C/D box 115-12   small nucleolar RNA, C/D box 115-29   small nucleolar RNA, C/D box 115-36   small nucleolar RNA, C/D box 115-39   small nucleolar RNA, C/D box 115-40   small nucleolar RNA, C/D box 115-43   small nucleolar RNA, C/D box 115-5   small nucleolar RNA, C/D box 115-9   small nucleolar RNA, C/D box 115-10   small nucleolar RNA, C/D box 115-14   small nucleolar RNA, C/D box 115-21   small nucleolar RNA, C/D box 115-4   small nucleolar RNA, C/D box 115-42   small nuclear ribonucleoprotein polypeptide N |
| 7982032 | SNORD115-1 | 3.142 | small nucleolar RNA, C/D box 115-1   small nucleolar RNA, C/D box 115-13   small nucleolar RNA, C/D box 115-16   small nucleolar RNA, C/D box 115-11   small nucleolar RNA, C/D box 115-12   small nucleolar RNA, C/D box 115-26   small nucleolar RNA, C/D box 115-29   small nucleolar RNA, C/D box 115-36   small nucleolar RNA, C/D box 115-39   small nucleolar RNA, C/D box 115-40   small nucleolar RNA, C/D box 115-41   small nucleolar RNA, C/D box 115-43   small nucleolar RNA, C/D box 115-5   small nucleolar RNA, C/D box 115-9   small nucleolar RNA, C/D box 115-10   small nucleolar RNA, C/D box 115-14   small nucleolar RNA, C/D box 115-21   small nucleolar RNA, C/D box 115-4   small nucleolar RNA, C/D box 115-42   small nuclear ribonucleoprotein polypeptide N                                                                                                                                                                                                                                                                                      |
| 7982038 | SNORD115-1 | 3.142 | small nucleolar RNA, C/D box 115-1   small nucleolar RNA, C/D box 115-13   small nucleolar RNA, C/D box 115-16   small nucleolar RNA, C/D box 115-11   small nucleolar RNA, C/D box 115-12   small nucleolar RNA, C/D box 115-26   small nucleolar RNA, C/D box 115-29   small nucleolar RNA, C/D box 115-36   small nucleolar RNA, C/D box 115-39   small nucleolar RNA, C/D box 115-40   small nucleolar RNA, C/D box 115-41   small nucleolar RNA, C/D box 115-43   small nucleolar RNA, C/D box 115-5   small nucleolar RNA, C/D box 115-9   small nucleolar RNA, C/D box 115-10   small nucleolar RNA, C/D box 115-14   small nucleolar RNA, C/D box 115-21   small nucleolar RNA, C/D box 115-4   small nucleolar RNA, C/D box 115-42   small nuclear ribonucleoprotein polypeptide N                                                                                                                                                                                                                                                                                      |
| 8112519 | FLJ40092   | 3.105 | similar to Putative POM121-like protein 1-like                                                                                                                                                                                                                                                                                                                                                                                                                                                                                                                                                                                                                                                                                                                                                                                                                                                                                                                                                                                                                                   |
| 8019804 | ROCK1      | 3.078 | Rho-associated, coiled-coil containing protein kinase 1 pseudogene 1                                                                                                                                                                                                                                                                                                                                                                                                                                                                                                                                                                                                                                                                                                                                                                                                                                                                                                                                                                                                             |
| 8131803 | IL6        | 3.024 | interleukin 6 (interferon, beta 2)                                                                                                                                                                                                                                                                                                                                                                                                                                                                                                                                                                                                                                                                                                                                                                                                                                                                                                                                                                                                                                               |

|         |           |       |                                                                                                                                                                                                                                                         |
|---------|-----------|-------|---------------------------------------------------------------------------------------------------------------------------------------------------------------------------------------------------------------------------------------------------------|
| 7898375 | RNU1A     | 2.997 | RNA, U1 small nuclear 1   RNA, U1 small nuclear 2   RNA, U1 small nuclear 3   RNA, U1 small nuclear 4   RNA, U1 small nuclear 5   RNA, U1 small nuclear 7   RNA, U1 small nuclear 8   glutathione S-transferase mu 2 (muscle)                           |
| 7898411 | RNU1A     | 2.997 | RNA, U1 small nuclear 1   RNA, U1 small nuclear 2   RNA, U1 small nuclear 3   RNA, U1 small nuclear 4   RNA, U1 small nuclear 5   RNA, U1 small nuclear 7   RNA, U1 small nuclear 8   glutathione S-transferase mu 2 (muscle)                           |
| 7912800 | RNU1A     | 2.997 | RNA, U1 small nuclear 1   RNA, U1 small nuclear 2   RNA, U1 small nuclear 3   RNA, U1 small nuclear 4   RNA, U1 small nuclear 5   RNA, U1 small nuclear 7   RNA, U1 small nuclear 8   glutathione S-transferase mu 2 (muscle)                           |
| 7912850 | RNU1A     | 2.997 | RNA, U1 small nuclear 1   RNA, U1 small nuclear 2   RNA, U1 small nuclear 3   RNA, U1 small nuclear 4   RNA, U1 small nuclear 5   RNA, U1 small nuclear 7   RNA, U1 small nuclear 8   glutathione S-transferase mu 2 (muscle)                           |
| 7919576 | RNU1A     | 2.997 | RNA, U1 small nuclear 1   RNA, U1 small nuclear 2   RNA, U1 small nuclear 3   RNA, U1 small nuclear 4   RNA, U1 small nuclear 5   RNA, U1 small nuclear 7   RNA, U1 small nuclear 8   glutathione S-transferase mu 2 (muscle)                           |
| 7973896 | RNU1A     | 2.997 | RNA, U1 small nuclear 1   RNA, U1 small nuclear 2   RNA, U1 small nuclear 3   RNA, U1 small nuclear 4   RNA, U1 small nuclear 5   RNA, U1 small nuclear 7   RNA, U1 small nuclear 8   RNA, U1 small nuclear 9   glutathione S-transferase mu 2 (muscle) |
| 7978568 | RNU1A     | 2.997 | RNA, U1 small nuclear 1   RNA, U1 small nuclear 2   RNA, U1 small nuclear 3   RNA, U1 small nuclear 4   RNA, U1 small nuclear 5   RNA, U1 small nuclear 7   RNA, U1 small nuclear 8   RNA, U1 small nuclear 9   glutathione S-transferase mu 2 (muscle) |
| 7898407 | LOC440570 | 2.984 | hypothetical LOC100132147   hypothetical LOC440570                                                                                                                                                                                                      |
| 8165658 | ND2       | 2.972 |                                                                                                                                                                                                                                                         |
| 8151631 | REXO1L2P  | 2.969 | REX1, RNA exonuclease 1 homolog ( <i>S. cerevisiae</i> )-like 2 (pseudogene)   REX1, RNA exonuclease 1 homolog ( <i>S. cerevisiae</i> )-like 1                                                                                                          |
| 8151627 | REXO1L1   | 2.949 | REX1, RNA exonuclease 1 homolog ( <i>S. cerevisiae</i> )-like 2 (pseudogene)                                                                                                                                                                            |
| 8095021 | SPATA18   | 2.944 | spermatogenesis associated 18 homolog (rat)                                                                                                                                                                                                             |
| 8027884 |           | 2.930 |                                                                                                                                                                                                                                                         |
| 7911343 | UIMC1     | 2.898 | ubiquitin interaction motif containing 1                                                                                                                                                                                                                |
| 8165703 | UIMC1     | 2.898 | ubiquitin interaction motif containing 1                                                                                                                                                                                                                |
| 8157105 | ZNF462    | 2.890 | zinc finger protein 462                                                                                                                                                                                                                                 |

|         |          |       |                                                                                                                                                                                                                                                                                                                                                        |
|---------|----------|-------|--------------------------------------------------------------------------------------------------------------------------------------------------------------------------------------------------------------------------------------------------------------------------------------------------------------------------------------------------------|
| 8135033 |          | 2.888 | mucin 12, cell surface associated                                                                                                                                                                                                                                                                                                                      |
| 8163936 | LHX6     | 2.878 | LIM homeobox 6                                                                                                                                                                                                                                                                                                                                         |
| 8151619 | REXO1L1  | 2.876 | REX1, RNA exonuclease 1 homolog ( <i>S. cerevisiae</i> )-like 2 (pseudogene)   REX1, RNA exonuclease 1 homolog ( <i>S. cerevisiae</i> )-like 1                                                                                                                                                                                                         |
| 8151615 | REXO1L2P | 2.869 | REX1, RNA exonuclease 1 homolog ( <i>S. cerevisiae</i> )-like 2 (pseudogene)                                                                                                                                                                                                                                                                           |
| 7996081 | GPR56    | 2.844 | G protein-coupled receptor 56                                                                                                                                                                                                                                                                                                                          |
| 8144397 | USP17L2  | 2.842 | ubiquitin specific peptidase 17-like 2   ubiquitin specific peptidase 17-like 6 (pseudogene)   ubiquitin specific peptidase 17-like 1 (pseudogene)   ubiquitin specific peptidase 17-like 4   ubiquitin specific peptidase 17-like 8   ubiquitin specific peptidase 17-like 3   ubiquitin specific peptidase 17   similar to deubiquitinating enzyme 3 |
| 8149241 | USP17L2  | 2.842 | ubiquitin specific peptidase 17   ubiquitin specific peptidase 17-like 1 (pseudogene)   ubiquitin specific peptidase 17-like 4   ubiquitin specific peptidase 17-like 8   ubiquitin specific peptidase 17-like 3   similar to deubiquitinating enzyme 3                                                                                                |
| 7920278 | S100A3   | 2.842 | S100 calcium binding protein A3                                                                                                                                                                                                                                                                                                                        |
| 8141726 |          | 2.828 |                                                                                                                                                                                                                                                                                                                                                        |
| 8173444 | IL2RG    | 2.817 | interleukin 2 receptor, gamma (severe combined immunodeficiency)                                                                                                                                                                                                                                                                                       |
| 7896748 |          | 2.811 |                                                                                                                                                                                                                                                                                                                                                        |
| 7896744 | OR4F16   | 2.807 | olfactory receptor, family 4, subfamily F, member 16   olfactory receptor, family 4, subfamily F, member 29   olfactory receptor, family 4, subfamily F, member 3   olfactory receptor, family 4, subfamily F, member 21                                                                                                                               |
| 7911345 | OR4F16   | 2.807 | olfactory receptor, family 4, subfamily F, member 16   olfactory receptor, family 4, subfamily F, member 29   olfactory receptor, family 4, subfamily F, member 3   olfactory receptor, family 4, subfamily F, member 21                                                                                                                               |
| 8110672 | OR4F16   | 2.807 | olfactory receptor, family 4, subfamily F, member 16   olfactory receptor, family 4, subfamily F, member 29   olfactory receptor, family 4, subfamily F, member 3   olfactory receptor, family 4, subfamily F, member 21                                                                                                                               |
| 7919269 | RNU1A    | 2.806 | RNA, U1 small nuclear 1   RNA, U1 small nuclear 2   RNA, U1 small nuclear 3   RNA, U1 small nuclear 4   RNA, U1 small nuclear 5   RNA, U1 small nuclear 6   RNA, U1 small nuclear 7   RNA, U1 small nuclear 8   RNA, U1 small nuclear 9   glutathione S-transferase mu 2 (muscle)                                                                      |

|         |          |       |                                                                                                                                                                                                                                                                                                                                                        |
|---------|----------|-------|--------------------------------------------------------------------------------------------------------------------------------------------------------------------------------------------------------------------------------------------------------------------------------------------------------------------------------------------------------|
| 7919349 | RNU1A    | 2.806 | RNA, U1 small nuclear 1   RNA, U1 small nuclear 2   RNA, U1 small nuclear 3   RNA, U1 small nuclear 4   RNA, U1 small nuclear 5   RNA, U1 small nuclear 6   RNA, U1 small nuclear 7   RNA, U1 small nuclear 8   RNA, U1 small nuclear 9   glutathione S-transferase mu 2 (muscle)                                                                      |
| 8118734 | ITPR3    | 2.805 | inositol 1,4,5-triphosphate receptor, type 3                                                                                                                                                                                                                                                                                                           |
| 8074991 | GGT5     | 2.802 | gamma-glutamyltransferase 5                                                                                                                                                                                                                                                                                                                            |
| 8101131 | CXCL11   | 2.800 | chemokine (C-X-C motif) ligand 11                                                                                                                                                                                                                                                                                                                      |
| 8149356 |          | 2.794 | ubiquitin specific peptidase 17-like 2   ubiquitin specific peptidase 17-like 6 (pseudogene)   ubiquitin specific peptidase 17   ubiquitin specific peptidase 17-like 1 (pseudogene)   ubiquitin specific peptidase 17-like 3   ubiquitin specific peptidase 17-like 4   ubiquitin specific peptidase 17-like 8   similar to deubiquitinating enzyme 3 |
| 7986635 | USP17L2  |       |                                                                                                                                                                                                                                                                                                                                                        |
| 8176570 | OR11K1P  | 2.777 |                                                                                                                                                                                                                                                                                                                                                        |
|         | DUX4     | 2.775 | double homeobox, 4-like   FSHD region gene 2 family, member C                                                                                                                                                                                                                                                                                          |
| 8148962 |          | 2.766 | olfactory receptor, family 4, subfamily F, member 21   olfactory receptor, family 4, subfamily F, member 16   olfactory receptor, family 4, subfamily F, member 29   olfactory receptor, family 4, subfamily F, member 3                                                                                                                               |
|         | OR4F21   |       |                                                                                                                                                                                                                                                                                                                                                        |
| 8114363 |          | 2.753 |                                                                                                                                                                                                                                                                                                                                                        |
| 8092392 | KLHL6    | 2.743 | kelch-like 6 (Drosophila)                                                                                                                                                                                                                                                                                                                              |
| 7937037 |          | 2.740 |                                                                                                                                                                                                                                                                                                                                                        |
| 8151603 | REXO1L2P | 2.739 | REX1, RNA exonuclease 1 homolog (S. cerevisiae)-like 2 (pseudogene)   REX1, RNA exonuclease 1 homolog (S. cerevisiae)-like 1                                                                                                                                                                                                                           |
| 8151607 | REXO1L1  | 2.739 | REX1, RNA exonuclease 1 homolog (S. cerevisiae)-like 2 (pseudogene)   REX1, RNA exonuclease 1 homolog (S. cerevisiae)-like 1                                                                                                                                                                                                                           |
| 8151623 | REXO1L2P | 2.739 | REX1, RNA exonuclease 1 homolog (S. cerevisiae)-like 2 (pseudogene)   REX1, RNA exonuclease 1 homolog (S. cerevisiae)-like 1                                                                                                                                                                                                                           |
| 7912157 | ERRFI1   | 2.734 | ERBB receptor feedback inhibitor 1                                                                                                                                                                                                                                                                                                                     |
| 8018975 | LGALS3BP | 2.728 | lectin, galactoside-binding, soluble, 3 binding protein                                                                                                                                                                                                                                                                                                |
| 8105987 | FLJ40092 | 2.726 | similar to Putative POM121-like protein 1-like                                                                                                                                                                                                                                                                                                         |
| 7904478 | LOC51152 | 2.718 | melanoma antigen                                                                                                                                                                                                                                                                                                                                       |
| 7912145 | TNFRSF9  | 2.713 | tumor necrosis factor receptor superfamily, member 9                                                                                                                                                                                                                                                                                                   |
| 8035351 | JAK3     | 2.686 | Janus kinase 3                                                                                                                                                                                                                                                                                                                                         |
| 8172781 | SSX7     | 2.654 | synovial sarcoma, X breakpoint 7                                                                                                                                                                                                                                                                                                                       |



|         |           |       |                                                                                                                                                                                                                                                                                                                                                                                                                                                                                                                                                                                                                              |
|---------|-----------|-------|------------------------------------------------------------------------------------------------------------------------------------------------------------------------------------------------------------------------------------------------------------------------------------------------------------------------------------------------------------------------------------------------------------------------------------------------------------------------------------------------------------------------------------------------------------------------------------------------------------------------------|
| 8167482 | GAGE4     | 2.651 | G antigen 12C   G antigen 12D   G antigen 12E   G antigen 12H   G antigen 4   G antigen 12J   G antigen 12I   G antigen 5   G antigen 7   G antigen 12B   G antigen 12G   G antigen 2B   G antigen 2C   G antigen 2D   G antigen 6   G antigen 2E   G antigen 8   G antigen 10   G antigen 13   G antigen 12C   G antigen 12D   G antigen 12E   G antigen 12H   G antigen 12J   G antigen 12B   G antigen 4   G antigen 12G   G antigen 5   G antigen 6   G antigen 2A   G antigen 2E   G antigen 8   G antigen 13   G antigen 7   G antigen 2C   G antigen 2D   G antigen 2B   G antigen 12I   G antigen 12F   G antigen 10 |
| 8167562 | GAGE13    | 2.651 | G antigen 12C   G antigen 12D   G antigen 12E   G antigen 12H   G antigen 4   G antigen 12J   G antigen 12I   G antigen 5   G antigen 7   G antigen 12B   G antigen 12G   G antigen 2B   G antigen 2C   G antigen 2D   G antigen 6   G antigen 2E   G antigen 8   G antigen 10   G antigen 13   G antigen 12C   G antigen 12D   G antigen 12E   G antigen 12H   G antigen 12J   G antigen 12B   G antigen 4   G antigen 12G   G antigen 5   G antigen 6   G antigen 2A   G antigen 2E   G antigen 8   G antigen 13   G antigen 7   G antigen 2C   G antigen 2D   G antigen 2B   G antigen 12I   G antigen 12F   G antigen 10 |
| 8144420 | LOC349196 | 2.647 |                                                                                                                                                                                                                                                                                                                                                                                                                                                                                                                                                                                                                              |
| 8144494 | LOC349196 | 2.647 |                                                                                                                                                                                                                                                                                                                                                                                                                                                                                                                                                                                                                              |
| 8163618 | TNFSF15   | 2.643 | tumor necrosis factor (ligand) superfamily, member 15                                                                                                                                                                                                                                                                                                                                                                                                                                                                                                                                                                        |
| 8161433 |           | 2.640 |                                                                                                                                                                                                                                                                                                                                                                                                                                                                                                                                                                                                                              |
| 8144395 | USP17L2   | 2.639 | ubiquitin specific peptidase 17-like 2   ubiquitin specific peptidase 17-like 6 (pseudogene)   ubiquitin specific peptidase 17   ubiquitin specific peptidase 17-like 1 (pseudogene)   ubiquitin specific peptidase 17-like 3   ubiquitin specific peptidase 17-like 4   ubiquitin specific peptidase 17-like 8   similar to deubiquitinating enzyme 3                                                                                                                                                                                                                                                                       |
| 8149228 |           | 2.630 |                                                                                                                                                                                                                                                                                                                                                                                                                                                                                                                                                                                                                              |
| 8176572 | DUX4      | 2.629 | double homeobox, 4   double homeobox, 4-like   FSHD region gene 2 family, member C                                                                                                                                                                                                                                                                                                                                                                                                                                                                                                                                           |
| 7982094 | SNRPN     | 2.621 | small nucleolar RNA, C/D box 115-44                                                                                                                                                                                                                                                                                                                                                                                                                                                                                                                                                                                          |
| 7997942 | CPNE7     | 2.620 | copine VII                                                                                                                                                                                                                                                                                                                                                                                                                                                                                                                                                                                                                   |
| 8149216 | LOC349196 | 2.617 |                                                                                                                                                                                                                                                                                                                                                                                                                                                                                                                                                                                                                              |
| 8134403 |           | 2.609 |                                                                                                                                                                                                                                                                                                                                                                                                                                                                                                                                                                                                                              |
| 7931665 | DUX4      | 2.607 | double homeobox, 4   double homeobox, 4-like   FSHD region gene 2 family, member C                                                                                                                                                                                                                                                                                                                                                                                                                                                                                                                                           |
| 8166509 | FAM48B2   | 2.605 | family with sequence similarity 48, member B2   family with sequence similarity 48, member B1                                                                                                                                                                                                                                                                                                                                                                                                                                                                                                                                |
| 8171844 | FAM48B2   | 2.605 | family with sequence similarity 48, member B2   family with sequence similarity 48, member B1                                                                                                                                                                                                                                                                                                                                                                                                                                                                                                                                |
| 7984475 | CORO2B    | 2.603 | coronin, actin binding protein, 2B                                                                                                                                                                                                                                                                                                                                                                                                                                                                                                                                                                                           |
| 8150537 | SLC20A2   | 2.597 | solute carrier family 20 (phosphate transporter), member 2                                                                                                                                                                                                                                                                                                                                                                                                                                                                                                                                                                   |
| 8123006 | SYNJ2     | 2.593 | synaptojanin 2                                                                                                                                                                                                                                                                                                                                                                                                                                                                                                                                                                                                               |
| 7931656 | DUX4      | 2.591 | double homeobox, 4   double homeobox, 4-like   FSHD region gene 2 family, member C                                                                                                                                                                                                                                                                                                                                                                                                                                                                                                                                           |
| 7931659 | DUX4      | 2.591 | double homeobox, 4   double homeobox, 4-like   FSHD region gene 2 family, member C                                                                                                                                                                                                                                                                                                                                                                                                                                                                                                                                           |
| 7931662 | DUX4      | 2.591 | double homeobox, 4   double homeobox, 4-like   FSHD region gene 2 family, member C                                                                                                                                                                                                                                                                                                                                                                                                                                                                                                                                           |
| 7931668 | DUX4      | 2.591 | double homeobox, 4   double homeobox, 4-like   FSHD region gene 2 family, member C                                                                                                                                                                                                                                                                                                                                                                                                                                                                                                                                           |

|         |           |       |                                                                                                                                                                                                                                                                                                                                                     |
|---------|-----------|-------|-----------------------------------------------------------------------------------------------------------------------------------------------------------------------------------------------------------------------------------------------------------------------------------------------------------------------------------------------------|
| 7931671 | DUX4      | 2.591 | double homeobox, 4   double homeobox, 4-like   FSHD region gene 2 family, member C<br>ubiquitin specific peptidase 17-like 2   ubiquitin specific peptidase 17   ubiquitin specific peptidase                                                                                                                                                       |
| 8149243 |           | 2.590 | 17-like 1 (pseudogene)   ubiquitin specific peptidase 17-like 3   ubiquitin specific peptidase 17-like                                                                                                                                                                                                                                              |
|         | USP17L2   |       | 4   ubiquitin specific peptidase 17-like 8   similar to deubiquitinating enzyme 3                                                                                                                                                                                                                                                                   |
| 8149218 | LOC349196 | 2.585 |                                                                                                                                                                                                                                                                                                                                                     |
| 8149220 | LOC349196 | 2.585 |                                                                                                                                                                                                                                                                                                                                                     |
| 8149222 | LOC349196 | 2.585 |                                                                                                                                                                                                                                                                                                                                                     |
| 8149224 | LOC349196 | 2.585 |                                                                                                                                                                                                                                                                                                                                                     |
| 8149226 | LOC349196 | 2.585 |                                                                                                                                                                                                                                                                                                                                                     |
| 8144416 | LOC349196 | 2.585 |                                                                                                                                                                                                                                                                                                                                                     |
| 8144418 | LOC349196 | 2.585 |                                                                                                                                                                                                                                                                                                                                                     |
| 8144490 | LOC349196 | 2.585 |                                                                                                                                                                                                                                                                                                                                                     |
| 8144492 | LOC349196 | 2.585 |                                                                                                                                                                                                                                                                                                                                                     |
| 7937335 | IFITM1    | 2.584 | interferon induced transmembrane protein 1 (9-27)                                                                                                                                                                                                                                                                                                   |
| 8040742 | MAPRE3    | 2.579 | microtubule-associated protein, RP/EB family, member 3                                                                                                                                                                                                                                                                                              |
| 8167508 |           | 2.578 | G antigen 12J   G antigen 12B   G antigen 6   G antigen 12C   G antigen 12D   G antigen 12E   G<br>antigen 12H   G antigen 13   G antigen 2E   G antigen 8   G antigen 12G   G antigen 2D   G antigen<br>2A   G antigen 2B   G antigen 2C   G antigen 4   G antigen 12I   G antigen 7   G antigen 12F   G<br>antigen 5   G antigen 10   G antigen 1 |
|         | GAGE13    |       |                                                                                                                                                                                                                                                                                                                                                     |
| 8149153 | LOC349196 | 2.569 |                                                                                                                                                                                                                                                                                                                                                     |
| 8149157 | LOC349196 | 2.569 |                                                                                                                                                                                                                                                                                                                                                     |
| 8167577 |           | 2.568 | G antigen 12G   G antigen 12C   G antigen 12D   G antigen 12E   G antigen 12H   G antigen 12J   G<br>antigen 12B   G antigen 4   G antigen 5   G antigen 6   G antigen 12I   G antigen 2A   G antigen 7  <br>G antigen 12F   G antigen 13   G antigen 2E   G antigen 8   G antigen 2C   G antigen 2D   G antigen<br>2B   G antigen 10   G antigen 1 |
|         | GAGE13    |       |                                                                                                                                                                                                                                                                                                                                                     |
| 8167584 |           | 2.568 | G antigen 12G   G antigen 12C   G antigen 12D   G antigen 12E   G antigen 12H   G antigen 12J   G<br>antigen 12B   G antigen 4   G antigen 5   G antigen 6   G antigen 12I   G antigen 2A   G antigen 7  <br>G antigen 13   G antigen 2E   G antigen 8   G antigen 2C   G antigen 2D   G antigen 2B   G antigen<br>12F   G antigen 10   G antigen 1 |
|         | GAGE13    |       |                                                                                                                                                                                                                                                                                                                                                     |
| 8052674 |           | 2.567 |                                                                                                                                                                                                                                                                                                                                                     |
| 8098725 | DUX4      | 2.563 | double homeobox, 4   double homeobox, 4-like   FSHD region gene 2 family, member C                                                                                                                                                                                                                                                                  |

|         |           |       |                                                                                                                                                                        |
|---------|-----------|-------|------------------------------------------------------------------------------------------------------------------------------------------------------------------------|
| 8142452 | TFEC      | 2.560 | transcription factor EC                                                                                                                                                |
| 8149165 | LOC349196 | 2.558 |                                                                                                                                                                        |
| 8149167 | LOC349196 | 2.558 |                                                                                                                                                                        |
| 7924069 |           | 2.556 |                                                                                                                                                                        |
| 8144410 | LOC349196 | 2.554 |                                                                                                                                                                        |
| 8149345 | CTSB      | 2.530 | cathepsin B                                                                                                                                                            |
| 8151709 |           | 2.530 |                                                                                                                                                                        |
| 7957260 | GLIPR1    | 2.524 | GLI pathogenesis-related 1   KRR1, small subunit (SSU) processome component, homolog (yeast)                                                                           |
| 8128123 | RRAGD     | 2.521 | Ras-related GTP binding D                                                                                                                                              |
| 7976443 | IFI27     | 2.520 | interferon, alpha-inducible protein 27                                                                                                                                 |
| 8095214 |           | 2.515 |                                                                                                                                                                        |
| 8149161 | LOC349196 | 2.513 |                                                                                                                                                                        |
| 8149210 | LOC349196 | 2.513 |                                                                                                                                                                        |
| 8160297 | PLIN2     | 2.512 | perilipin 2                                                                                                                                                            |
| 8099805 |           | 2.508 |                                                                                                                                                                        |
| 8085114 |           | 2.500 |                                                                                                                                                                        |
| 8144412 | LOC349196 | 2.498 |                                                                                                                                                                        |
| 8144414 | LOC349196 | 2.498 |                                                                                                                                                                        |
| 8157231 |           | 2.494 |                                                                                                                                                                        |
| 8022870 |           | 2.493 |                                                                                                                                                                        |
| 8073068 | APOBEC3C  | 2.480 | apolipoprotein B mRNA editing enzyme, catalytic polypeptide-like 3C   apolipoprotein B mRNA editing enzyme, catalytic polypeptide-like 3D                              |
| 8149208 | OR7E125P  | 2.473 | olfactory receptor, family 7, subfamily E, member 125 pseudogene   olfactory receptor, family 7, subfamily E, member 87 pseudogene   similar to olfactory receptor 873 |
| 7985918 |           | 2.472 |                                                                                                                                                                        |
| 8111214 |           | 2.462 | similar to TBP-associated factor 11                                                                                                                                    |
| 7919324 |           | 2.458 |                                                                                                                                                                        |
| 7960896 | LOC650293 | 2.447 | olfactory receptor, family 7, subfamily E, member 87 pseudogene   olfactory receptor, family 7, subfamily E, member 125 pseudogene   similar to olfactory receptor 873 |
| 7904429 | HSD3B1    | 2.443 | 3-beta-hydroxysteroid dehydrogenase, tissue-type heart                                                                                                                 |
| 7960898 | OR7E125P  | 2.443 |                                                                                                                                                                        |

|         |           |       |                                                                                                                                                                                                                                                                                                   |
|---------|-----------|-------|---------------------------------------------------------------------------------------------------------------------------------------------------------------------------------------------------------------------------------------------------------------------------------------------------|
| 8149151 | LOC349196 | 2.438 |                                                                                                                                                                                                                                                                                                   |
| 8149214 | LOC349196 | 2.438 |                                                                                                                                                                                                                                                                                                   |
| 8095986 | ANXA3     | 2.435 | annexin A3                                                                                                                                                                                                                                                                                        |
| 8066027 |           | 2.431 |                                                                                                                                                                                                                                                                                                   |
| 8010186 |           | 2.425 |                                                                                                                                                                                                                                                                                                   |
| 8098730 | DUX4      | 2.423 | double homeobox, 4   double homeobox, 4-like   FSHD region gene 2 family, member C                                                                                                                                                                                                                |
| 8098743 | DUX4      | 2.423 | double homeobox, 4   double homeobox, 4-like   FSHD region gene 2 family, member C                                                                                                                                                                                                                |
| 7919578 | ATG9B     | 2.398 | glutathione S-transferase mu 2 (muscle)                                                                                                                                                                                                                                                           |
| 8037614 | GPR4      | 2.398 | G protein-coupled receptor 4                                                                                                                                                                                                                                                                      |
| 8098732 | DUX4      | 2.396 | double homeobox, 4   double homeobox, 4-like   double homeobox, 2   FSHD region gene 2 family, member C                                                                                                                                                                                           |
| 7981724 |           | 2.395 | immunoglobulin heavy constant delta   immunoglobulin heavy constant gamma 1 (G1m marker)   hypothetical protein LOC100292999                                                                                                                                                                      |
| 8011713 | CXCL16    | 2.395 | chemokine (C-X-C motif) ligand 16                                                                                                                                                                                                                                                                 |
| 7953735 |           | 2.392 |                                                                                                                                                                                                                                                                                                   |
| 8098740 | DUX4      | 2.382 | double homeobox, 4   double homeobox, 4-like   double homeobox, 2   FSHD region gene 2 family, member C                                                                                                                                                                                           |
| 8099841 | TLR6      | 2.378 | toll-like receptor 6                                                                                                                                                                                                                                                                              |
| 8167526 | GAGE13    | 2.373 | G antigen 12J   G antigen 6   G antigen 2A   G antigen 2E   G antigen 8   G antigen 13   G antigen 12G   G antigen 4   G antigen 2C   G antigen 2D   G antigen 12B   G antigen 12C   G antigen 12D   G antigen 12E   G antigen 12H   G antigen 2B   G antigen 5   G antigen 12I   G antigen 7   G |
| 8008388 | SPATA20   | 2.366 | spermatogenesis associated 20                                                                                                                                                                                                                                                                     |
| 7986517 |           | 2.363 | dynamamin 1 pseudogene   similar to dynamamin 1   similar to hypothetical protein DKFZp434I1020                                                                                                                                                                                                   |
| 7986522 |           | 2.363 | dynamamin 1 pseudogene   similar to dynamamin 1   similar to hypothetical protein DKFZp434I1020                                                                                                                                                                                                   |
| 8071272 | GP1BB     | 2.360 | glycoprotein Ib (platelet), beta polypeptide                                                                                                                                                                                                                                                      |
| 8154245 | PDCD1LG2  | 2.359 | programmed cell death 1 ligand 2                                                                                                                                                                                                                                                                  |
| 7986509 | LOC441734 | 2.358 | dynamamin 1 pseudogene   similar to dynamamin 1   similar to hypothetical protein DKFZp434I1020                                                                                                                                                                                                   |
| 7986512 |           | 2.358 | similar to dynamamin 1   similar to hypothetical protein DKFZp434I1020                                                                                                                                                                                                                            |
| 7986527 | C15orf51  | 2.358 | similar to dynamamin 1   similar to hypothetical protein DKFZp434I1020                                                                                                                                                                                                                            |
| 7986520 |           | 2.356 | dynamamin 1 pseudogene   similar to dynamamin 1   similar to hypothetical protein DKFZp434I1020                                                                                                                                                                                                   |
| 7979710 | PLEK2     | 2.348 | pleckstrin 2                                                                                                                                                                                                                                                                                      |

|         |              |       |                                                                                                                                                                        |
|---------|--------------|-------|------------------------------------------------------------------------------------------------------------------------------------------------------------------------|
| 7917180 |              | 2.348 |                                                                                                                                                                        |
| 7985999 |              | 2.346 |                                                                                                                                                                        |
| 7973006 | OR4H12P      | 2.334 | olfactory receptor, family 4, subfamily H, member 12 pseudogene                                                                                                        |
| 8080013 | MAPKAPK3     | 2.332 | mitogen-activated protein kinase-activated protein kinase 3                                                                                                            |
| 8139943 | SPDYE7P      | 2.326 | speedy homolog E7 ( <i>Xenopus laevis</i> ), pseudogene                                                                                                                |
| 8089082 | DCBLD2       | 2.325 | discoidin, CUB and LCCL domain containing 2                                                                                                                            |
| 7902541 | IFI44L       | 2.325 | interferon-induced protein 44-like                                                                                                                                     |
| 7962183 | AK3L1        | 2.324 | adenylate kinase 3-like 1                                                                                                                                              |
| 8155453 | LOC10012903C | 2.324 | hypothetical protein LOC100289385   hypothetical LOC100132883                                                                                                          |
| 8161375 | LOC10012903C | 2.324 | hypothetical protein LOC100289385   hypothetical LOC100132883                                                                                                          |
| 8089232 |              | 2.320 |                                                                                                                                                                        |
| 8144422 | LOC349196    | 2.307 | olfactory receptor, family 7, subfamily E, member 125 pseudogene   similar to olfactory receptor                                                                       |
| 8008454 | ABCC3        | 2.306 | ATP-binding cassette, sub-family C (CFTR/MRP), member 3                                                                                                                |
| 8155596 |              | 2.301 |                                                                                                                                                                        |
| 8113120 |              | 2.301 | microRNA 1974   transducer of ERBB2, 2                                                                                                                                 |
| 8165707 |              | 2.301 | microRNA 1974   transducer of ERBB2, 2                                                                                                                                 |
| 8115884 |              | 2.299 |                                                                                                                                                                        |
| 7981046 | IFI27L2      | 2.292 | interferon, alpha-inducible protein 27-like 2                                                                                                                          |
| 8072360 | TCN2         | 2.289 | transcobalamin II   transcobalamin II; macrocytic anemia                                                                                                               |
| 7989195 |              | 2.288 |                                                                                                                                                                        |
| 8149148 | OR7E125P     | 2.285 | olfactory receptor, family 7, subfamily E, member 125 pseudogene   olfactory receptor, family 7, subfamily E, member 87 pseudogene   similar to olfactory receptor 873 |
| 7984620 |              | 2.276 |                                                                                                                                                                        |
| 7898112 |              | 2.266 |                                                                                                                                                                        |
| 8135363 | PIK3CG       | 2.258 | phosphoinositide-3-kinase, catalytic, gamma polypeptide                                                                                                                |
| 8165672 |              | 2.257 | replication factor C (activator 1) 1, 145kDa                                                                                                                           |
| 7944867 |              | 2.250 | sialic acid acetyltransferase                                                                                                                                          |
| 7950370 |              | 2.248 |                                                                                                                                                                        |
| 8144488 | LOC729346    | 2.247 |                                                                                                                                                                        |
| 8144496 | LOC349196    | 2.246 | olfactory receptor, family 7, subfamily E, member 125 pseudogene   similar to olfactory receptor                                                                       |

|         |              |       |                                                                                                                                                                                                                                                                                                                             |
|---------|--------------|-------|-----------------------------------------------------------------------------------------------------------------------------------------------------------------------------------------------------------------------------------------------------------------------------------------------------------------------------|
| 7986598 |              | 2.244 | golgin A6 family-like 1   golgi autoantigen, golgin subfamily a-like   hypothetical LOC645202   golgin A6 family-like 6   transmembrane domain-containing protein ENSP00000320207-like   Putative golgin subfamily A member 6-like protein 6                                                                                |
| 8165663 | GOLGA6L1     | 2.242 | glycerol-3-phosphate acyltransferase, mitochondrial                                                                                                                                                                                                                                                                         |
| 8063345 | SNORD12C     | 2.241 | small nucleolar RNA, C/D box 12C                                                                                                                                                                                                                                                                                            |
| 8083594 | PTX3         | 2.234 | pentraxin 3, long   pentraxin-related gene, rapidly induced by IL-1 beta                                                                                                                                                                                                                                                    |
| 8107857 |              | 2.234 |                                                                                                                                                                                                                                                                                                                             |
| 8054513 | LOC151009    | 2.234 | hypothetical LOC151009   hypothetical protein LOC440894                                                                                                                                                                                                                                                                     |
| 8009301 | PRKCA        | 2.227 | protein kinase C, alpha                                                                                                                                                                                                                                                                                                     |
| 7986736 |              | 2.226 | golgin A6 family-like 1   golgi autoantigen, golgin subfamily a-like   hypothetical LOC645202   golgin A6 family-like 6   transmembrane domain-containing protein ENSP00000320207-like                                                                                                                                      |
| 8168463 | LOC100132025 | 2.220 | fibroblast growth factor 16                                                                                                                                                                                                                                                                                                 |
|         | FGF16        |       |                                                                                                                                                                                                                                                                                                                             |
| 7986741 |              | 2.219 | golgin A6 family-like 1   golgi autoantigen, golgin subfamily a-like   hypothetical LOC645202   golgin A6 family-like 6   transmembrane domain-containing protein ENSP00000320207-like   Putative golgin subfamily A member 6-like protein 6                                                                                |
|         | GOLGA6L1     |       |                                                                                                                                                                                                                                                                                                                             |
| 8145134 |              | 2.218 |                                                                                                                                                                                                                                                                                                                             |
| 7981777 | LOC400968    | 2.217 |                                                                                                                                                                                                                                                                                                                             |
| 7961418 |              | 2.205 |                                                                                                                                                                                                                                                                                                                             |
| 7905025 | DRD5         | 2.204 | dopamine receptor D5                                                                                                                                                                                                                                                                                                        |
| 7981722 | IGHA1        | 2.204 | immunoglobulin heavy constant alpha 1   immunoglobulin heavy constant gamma 1 (G1m marker)                                                                                                                                                                                                                                  |
| 8104122 |              | 2.203 | double homeobox, 4   double homeobox, 4-like   FSHD region gene 2 family, member C   double homeobox 4c                                                                                                                                                                                                                     |
|         | TUBB4Q       |       |                                                                                                                                                                                                                                                                                                                             |
| 7896750 |              | 2.196 | glycerol-3-phosphate acyltransferase, mitochondrial                                                                                                                                                                                                                                                                         |
| 7982254 |              | 2.196 |                                                                                                                                                                                                                                                                                                                             |
| 7987110 |              | 2.196 |                                                                                                                                                                                                                                                                                                                             |
| 8037374 | PLAUR        | 2.193 | plasminogen activator, urokinase receptor                                                                                                                                                                                                                                                                                   |
|         |              |       | G antigen 1   G antigen 12B   G antigen 12C   G antigen 12D   G antigen 12E   G antigen 12G   G antigen 12H   G antigen 12J   G antigen 13   G antigen 2A   G antigen 2B   G antigen 2C   G antigen 2D   G antigen 4   G antigen 6   G antigen 2E   G antigen 5   G antigen 8   G antigen 12I   G antigen 7   G antigen 12F |
| 8167573 |              | 2.190 |                                                                                                                                                                                                                                                                                                                             |
|         | GAGE13       |       |                                                                                                                                                                                                                                                                                                                             |
| 7965322 | KITLG        | 2.189 | KIT ligand                                                                                                                                                                                                                                                                                                                  |

|         |           |       |                                                                                                                                                                     |
|---------|-----------|-------|---------------------------------------------------------------------------------------------------------------------------------------------------------------------|
| 8149396 | LOC442381 | 2.187 | similar to seven transmembrane helix receptor                                                                                                                       |
| 7982020 | SNRPN     | 2.186 | small nucleolar RNA, C/D box 115-7   small nuclear ribonucleoprotein polypeptide N                                                                                  |
| 8174983 |           | 2.181 |                                                                                                                                                                     |
| 7963313 | GALNT6    | 2.180 | UDP-N-acetyl-alpha-D-galactosamine:polypeptide N-acetylgalactosaminyltransferase 6 (GalNAc-                                                                         |
| 8165709 |           | 2.173 |                                                                                                                                                                     |
| 8076424 | CYP2D6    | 2.173 | cytochrome P450, family 2, subfamily D, polypeptide 6                                                                                                               |
| 7913185 |           | 2.169 |                                                                                                                                                                     |
| 8079153 | ABHD5     | 2.168 | abhydrolase domain containing 5                                                                                                                                     |
| 7975457 |           | 2.164 |                                                                                                                                                                     |
| 7981750 | LOC400968 | 2.157 |                                                                                                                                                                     |
| 7994265 |           | 2.157 |                                                                                                                                                                     |
| 7977046 | TNFAIP2   | 2.156 | tumor necrosis factor, alpha-induced protein 2                                                                                                                      |
| 8117718 | OR2J3     | 2.149 | olfactory receptor, family 2, subfamily J, member 3                                                                                                                 |
| 8004219 |           | 2.146 |                                                                                                                                                                     |
| 7942274 | OR7E87P   | 2.143 | olfactory receptor, family 7, subfamily E, member 87 pseudogene                                                                                                     |
| 7977450 | OR11H1    | 2.142 | olfactory receptor, family 11, subfamily H, member 1   olfactory receptor, family 11, subfamily H, member 12   olfactory receptor, family 11, subfamily H, member 2 |
| 7971996 |           | 2.142 |                                                                                                                                                                     |
| 8141206 | BAIAP2L1  | 2.141 | BAI1-associated protein 2-like 1                                                                                                                                    |
| 7901852 |           | 2.140 |                                                                                                                                                                     |
| 7903592 | KIAA1324  | 2.139 |                                                                                                                                                                     |
| 8156599 |           | 2.136 |                                                                                                                                                                     |
| 8098326 |           | 2.136 |                                                                                                                                                                     |
| 8128939 | TRAF3IP2  | 2.136 | TRAF3 interacting protein 2                                                                                                                                         |
| 8053057 |           | 2.132 |                                                                                                                                                                     |
| 7936673 | RGS10     | 2.130 | regulator of G-protein signaling 10                                                                                                                                 |
| 8155754 | MAMDC2    | 2.127 | MAM domain containing 2                                                                                                                                             |
| 8147777 | CTHRC1    | 2.127 | collagen triple helix repeat containing 1                                                                                                                           |
| 7952810 | IGSF9B    | 2.126 | immunoglobulin superfamily, member 9B                                                                                                                               |
| 8000480 |           | 2.125 |                                                                                                                                                                     |
| 7902400 | SNORD45B  | 2.120 | small nucleolar RNA, C/D box 45B   Rab geranylgeranyltransferase, beta subunit                                                                                      |

|         |          |                                                                                                                                                                                                                                                                                                                                                                                                                                                                                                                                                                                                                                                                                                                                                                                                                                                                                                                                                                                             |
|---------|----------|---------------------------------------------------------------------------------------------------------------------------------------------------------------------------------------------------------------------------------------------------------------------------------------------------------------------------------------------------------------------------------------------------------------------------------------------------------------------------------------------------------------------------------------------------------------------------------------------------------------------------------------------------------------------------------------------------------------------------------------------------------------------------------------------------------------------------------------------------------------------------------------------------------------------------------------------------------------------------------------------|
| 8113356 |          | 2.120 glycerol-3-phosphate acyltransferase, mitochondrial<br>family with sequence similarity 90, member A13   family with sequence similarity 90, member A14   family with sequence similarity 90, member A18   family with sequence similarity 90, member A19   family with sequence similarity 90, member A5   family with sequence similarity 90, member A8   family with sequence similarity 90, member A9   family with sequence similarity 90, member A7   family with sequence similarity 90, member A10   family with sequence similarity 90, member A20   family with sequence similarity 90, member A1   family with sequence similarity 90, member A23 pseudogene   family with sequence similarity 90, member A15   family with sequence similarity 90, member A24 (pseudogene)   family with sequence similarity 90, member A3   family with sequence similarity 90, member A22 pseudogene   family with sequence similarity 90 pseudogene   hypothetical protein LOC100287045 |
| 8144424 | FAM90A1  | 2.119 family with sequence similarity 90, member A13   family with sequence similarity 90, member A14   family with sequence similarity 90, member A18   family with sequence similarity 90, member A19   family with sequence similarity 90, member A5   family with sequence similarity 90, member A8   family with sequence similarity 90, member A9   family with sequence similarity 90, member A7   family with sequence similarity 90, member A10   family with sequence similarity 90, member A20   family with sequence similarity 90, member A1   family with sequence similarity 90, member A23 pseudogene   family with sequence similarity 90, member A15   family with sequence similarity 90, member A24 (pseudogene)   family with sequence similarity 90, member A3   family with sequence similarity 90, member A22 pseudogene   family with sequence similarity 90 pseudogene   hypothetical protein LOC100287045                                                        |
| 8144440 | FAM90A1  | 2.119 family with sequence similarity 90, member A13   family with sequence similarity 90, member A14   family with sequence similarity 90, member A18   family with sequence similarity 90, member A19   family with sequence similarity 90, member A5   family with sequence similarity 90, member A8   family with sequence similarity 90, member A9   family with sequence similarity 90, member A7   family with sequence similarity 90, member A10   family with sequence similarity 90, member A20   family with sequence similarity 90, member A1   family with sequence similarity 90, member A23 pseudogene   family with sequence similarity 90, member A15   family with sequence similarity 90, member A24 (pseudogene)   family with sequence similarity 90, member A3   family with sequence similarity 90, member A22 pseudogene   family with sequence similarity 90 pseudogene   hypothetical protein LOC100287045                                                        |
| 8165700 |          | 2.117 immunoglobulin lambda joining 3   immunoglobulin heavy variable 3-23   immunoglobulin heavy constant gamma 1 (G1m marker)   similar to hCG2036739   similar to hCG2042717                                                                                                                                                                                                                                                                                                                                                                                                                                                                                                                                                                                                                                                                                                                                                                                                             |
| 7981730 | IGHV@    | 2.117 immunoglobulin lambda joining 3   immunoglobulin heavy variable 3-23   immunoglobulin heavy constant gamma 1 (G1m marker)   similar to hCG2036739   similar to hCG2042717                                                                                                                                                                                                                                                                                                                                                                                                                                                                                                                                                                                                                                                                                                                                                                                                             |
| 8093304 | CCRL2    | 2.114 chemokine (C-C motif) receptor-like 2                                                                                                                                                                                                                                                                                                                                                                                                                                                                                                                                                                                                                                                                                                                                                                                                                                                                                                                                                 |
| 8136807 | TRY6     | 2.113 protease, serine, 2 (trypsin 2)   trypsinogen C   protease, serine, 3   protease, serine, 1 (trypsin 1)                                                                                                                                                                                                                                                                                                                                                                                                                                                                                                                                                                                                                                                                                                                                                                                                                                                                               |
| 7956876 |          | 2.111 LLP homolog, long-term synaptic facilitation (Aplysia)                                                                                                                                                                                                                                                                                                                                                                                                                                                                                                                                                                                                                                                                                                                                                                                                                                                                                                                                |
| 7981787 | GOLGA6L1 | 2.109 golgin A6 family-like 1   golgi autoantigen, golgin subfamily a-like   hypothetical LOC645202   golgin A6 family-like 6   transmembrane domain-containing protein ENSP00000320207-like                                                                                                                                                                                                                                                                                                                                                                                                                                                                                                                                                                                                                                                                                                                                                                                                |
| 8092541 | LIPH     | 2.107 lipase, member H                                                                                                                                                                                                                                                                                                                                                                                                                                                                                                                                                                                                                                                                                                                                                                                                                                                                                                                                                                      |
| 8113122 |          | 2.103                                                                                                                                                                                                                                                                                                                                                                                                                                                                                                                                                                                                                                                                                                                                                                                                                                                                                                                                                                                       |



|         |           |       |                                                                                                                                                                      |
|---------|-----------|-------|----------------------------------------------------------------------------------------------------------------------------------------------------------------------|
| 8026971 | IFI30     | 2.101 | interferon, gamma-inducible protein 30                                                                                                                               |
| 7951259 | MMP10     | 2.100 | matrix metalloproteinase 10 (stromelysin 2)                                                                                                                          |
| 7949896 |           | 2.100 | olfactory receptor, family 7, subfamily E, member 87 pseudogene                                                                                                      |
| 7916609 | JUN       | 2.100 | jun oncogene                                                                                                                                                         |
| 8067836 | C21orf94  | 2.099 | chromosome 21 open reading frame 94                                                                                                                                  |
| 8095626 |           | 2.095 |                                                                                                                                                                      |
| 8112584 | ZNF366    | 2.095 | zinc finger protein 366                                                                                                                                              |
| 8103238 |           | 2.095 |                                                                                                                                                                      |
| 8151927 |           | 2.094 |                                                                                                                                                                      |
| 7960874 | C3AR1     | 2.094 | complement component 3a receptor 1                                                                                                                                   |
| 8128445 |           | 2.093 |                                                                                                                                                                      |
| 8044731 |           | 2.092 |                                                                                                                                                                      |
| 8053725 | DRD5      | 2.090 | dopamine receptor D5                                                                                                                                                 |
| 8165692 |           | 2.090 |                                                                                                                                                                      |
| 8100426 |           | 2.090 |                                                                                                                                                                      |
| 7938702 |           | 2.088 |                                                                                                                                                                      |
| 7973008 | OR4M1     | 2.086 | olfactory receptor, family 4, subfamily M, member 1   olfactory receptor, family 4, subfamily M, member 2                                                            |
| 8174933 |           | 2.084 |                                                                                                                                                                      |
| 8147112 | CA13      | 2.083 | carbonic anhydrase XIII                                                                                                                                              |
| 8165021 |           | 2.082 |                                                                                                                                                                      |
| 7940182 | OR4D10    | 2.075 | olfactory receptor, family 4, subfamily D, member 10   olfactory receptor, family 4, subfamily D, member 11   olfactory receptor, family 4, subfamily D, member 9    |
| 8015230 |           | 2.074 | keratin associated protein 4-12   keratin associated protein 4-11   keratin associated protein 4-6   keratin associated protein 4-8   keratin associated protein 4-7 |
| 8045275 |           | 2.071 |                                                                                                                                                                      |
| 8062251 | EPB41L1   | 2.066 | erythrocyte membrane protein band 4.1-like 1                                                                                                                         |
| 7919584 | HIST2H2BF | 2.065 | histone cluster 2, H2bf   histone cluster 2, H2ba   histone cluster 2, H2be                                                                                          |
| 8103483 | FSTL5     | 2.062 | follistatin-like 5                                                                                                                                                   |
| 8113344 |           | 2.062 |                                                                                                                                                                      |
| 8114207 |           | 2.062 |                                                                                                                                                                      |

|         |              |       |                                                                                                                                                                                                                                                                                                                                                                                                                                                                                                                                                                                                                                                                                                                                                                                                                                                                                                                                |
|---------|--------------|-------|--------------------------------------------------------------------------------------------------------------------------------------------------------------------------------------------------------------------------------------------------------------------------------------------------------------------------------------------------------------------------------------------------------------------------------------------------------------------------------------------------------------------------------------------------------------------------------------------------------------------------------------------------------------------------------------------------------------------------------------------------------------------------------------------------------------------------------------------------------------------------------------------------------------------------------|
| 8169634 |              | 2.054 | family with sequence similarity 90, member A10   family with sequence similarity 90, member A13   family with sequence similarity 90, member A14   family with sequence similarity 90, member A5   family with sequence similarity 90, member A7   family with sequence similarity 90, member A8   family with sequence similarity 90, member A9   family with sequence similarity 90, member A18   family with sequence similarity 90, member A19   family with sequence similarity 90, member A20   family with sequence similarity 90, member A1   family with sequence similarity 90, member A15   family with sequence similarity 90, member A23 pseudogene   family with sequence similarity 90, member A24 (pseudogene)   family with sequence similarity 90, member A3   family with sequence similarity 90, member A22 pseudogene   family with sequence similarity 90 pseudogene   hypothetical protein LOC100287045 |
| 8144448 |              | 2.054 |                                                                                                                                                                                                                                                                                                                                                                                                                                                                                                                                                                                                                                                                                                                                                                                                                                                                                                                                |
| 8085370 | FAM90A1      | 2.053 |                                                                                                                                                                                                                                                                                                                                                                                                                                                                                                                                                                                                                                                                                                                                                                                                                                                                                                                                |
| 8003605 | GSTM1L       | 2.052 |                                                                                                                                                                                                                                                                                                                                                                                                                                                                                                                                                                                                                                                                                                                                                                                                                                                                                                                                |
| 8027837 | CD22         | 2.051 |                                                                                                                                                                                                                                                                                                                                                                                                                                                                                                                                                                                                                                                                                                                                                                                                                                                                                                                                |
| 7901287 | CYP4Z1       | 2.047 | cytochrome P450, family 4, subfamily Z, polypeptide 1                                                                                                                                                                                                                                                                                                                                                                                                                                                                                                                                                                                                                                                                                                                                                                                                                                                                          |
| 8123336 |              | 2.046 |                                                                                                                                                                                                                                                                                                                                                                                                                                                                                                                                                                                                                                                                                                                                                                                                                                                                                                                                |
| 7978331 | CBLN3        | 2.042 | cerebellin 3 precursor                                                                                                                                                                                                                                                                                                                                                                                                                                                                                                                                                                                                                                                                                                                                                                                                                                                                                                         |
| 8111670 | GDNF         | 2.042 | glial cell derived neurotrophic factor                                                                                                                                                                                                                                                                                                                                                                                                                                                                                                                                                                                                                                                                                                                                                                                                                                                                                         |
| 8163825 | TRAF1        | 2.040 | TNF receptor-associated factor 1                                                                                                                                                                                                                                                                                                                                                                                                                                                                                                                                                                                                                                                                                                                                                                                                                                                                                               |
| 8095260 |              | 2.034 |                                                                                                                                                                                                                                                                                                                                                                                                                                                                                                                                                                                                                                                                                                                                                                                                                                                                                                                                |
| 8115871 | FLJ16171     | 2.029 |                                                                                                                                                                                                                                                                                                                                                                                                                                                                                                                                                                                                                                                                                                                                                                                                                                                                                                                                |
| 7937940 | OR52K3P      | 2.028 | olfactory receptor, family 52, subfamily K, member 3 pseudogene                                                                                                                                                                                                                                                                                                                                                                                                                                                                                                                                                                                                                                                                                                                                                                                                                                                                |
| 8032212 |              | 2.024 | NADH dehydrogenase (ubiquinone) Fe-S protein 7, 20kDa (NADH-coenzyme Q reductase)                                                                                                                                                                                                                                                                                                                                                                                                                                                                                                                                                                                                                                                                                                                                                                                                                                              |
| 8155521 | FAM27D1      | 2.024 | family with sequence similarity 27, member A   family with sequence similarity 27, member B   family with sequence similarity 27, member C                                                                                                                                                                                                                                                                                                                                                                                                                                                                                                                                                                                                                                                                                                                                                                                     |
| 8090637 |              | 2.024 |                                                                                                                                                                                                                                                                                                                                                                                                                                                                                                                                                                                                                                                                                                                                                                                                                                                                                                                                |
| 8149380 | DEFB109P1B   | 2.023 | defensin, beta 109, pseudogene 1B   defensin, beta 109, pseudogene 1                                                                                                                                                                                                                                                                                                                                                                                                                                                                                                                                                                                                                                                                                                                                                                                                                                                           |
| 8053427 |              | 2.020 |                                                                                                                                                                                                                                                                                                                                                                                                                                                                                                                                                                                                                                                                                                                                                                                                                                                                                                                                |
| 7987163 |              | 2.017 | formin 1                                                                                                                                                                                                                                                                                                                                                                                                                                                                                                                                                                                                                                                                                                                                                                                                                                                                                                                       |
| 8139458 | LOC100128364 | 2.017 | hypothetical LOC100128364   hypothetical protein LOC100134663                                                                                                                                                                                                                                                                                                                                                                                                                                                                                                                                                                                                                                                                                                                                                                                                                                                                  |
| 7934411 | USP54        | 2.016 | ubiquitin specific peptidase 54                                                                                                                                                                                                                                                                                                                                                                                                                                                                                                                                                                                                                                                                                                                                                                                                                                                                                                |

|         |              |       |                                                                                                                                                                        |
|---------|--------------|-------|------------------------------------------------------------------------------------------------------------------------------------------------------------------------|
| 7981990 | SNRPN        | 2.015 | small nucleolar RNA, C/D box 116-21   small nucleolar RNA, C/D box 116 cluster                                                                                         |
| 7919301 | LOC100130236 | 2.013 |                                                                                                                                                                        |
| 8015218 |              | 2.009 | keratin associated protein 4-7   keratin associated protein 4-9   keratin associated protein 4-8  <br>keratin associated protein 4-6   keratin associated protein 4-11 |
| 8135031 | MUC12        | 2.006 | mucin 12, cell surface associated                                                                                                                                      |
| 8034696 |              | 2.005 | microRNA 27a                                                                                                                                                           |
| 8163729 |              | 2.005 | microRNA 147                                                                                                                                                           |
| 8139242 |              | 2.004 |                                                                                                                                                                        |

**Table S6. Expression changes of LEC- and BEC-specific genes by BMP-9 treatment and Prox1 knockdown, related to Figure 5.**

**LEC-specific genes**

| Probe ID | Gene Symbol | Fold Change (4hr)<br>(BMP-9/Control) | Fold Change (24hr)<br>(BMP-9/Control) | Fold Change<br>(siProx1/siControl) |
|----------|-------------|--------------------------------------|---------------------------------------|------------------------------------|
| 7897044  | PRKCZ       | 0.913                                | 0.968                                 | 0.779                              |
| 7898057  | PDPN        | 0.903                                | 0.52                                  | 0.8                                |
| 7901010  | KIF2C       | 1.089                                | 0.512                                 | 0.329                              |
| 7905826  | CKS1B       | 0.696                                | 0.616                                 | 1.041                              |
| 7909225  | DYRK3       | 2.562                                | 2.458                                 | 1.002                              |
| 7909681  | PROX1       | 0.321                                | 0.628                                 | 0.246                              |
| 7909708  | CENPF       | 1.024                                | 0.442                                 | 0.269                              |
| 7910096  | LBR         | 1.148                                | 1.125                                 | 1.433                              |
| 7916432  | DHCR24      | 0.794                                | 0.89                                  | 0.889                              |
| 7922717  | RGS16       | 0.994                                | 0.983                                 | 1.171                              |
| 7924603  | LBR         | 0.767                                | 0.673                                 | 0.416                              |
| 7926410  | MRC1        | 0.888                                | 0.511                                 | 0.742                              |
| 7926451  | MRC1        | 0.888                                | 0.511                                 | 0.742                              |
| 7926896  | CKS1B       | 1.003                                | 0.561                                 | 0.506                              |
| 7926983  | CREM        | 0.828                                | 0.52                                  | 0.551                              |
| 7927732  | ARID5B      | 1.325                                | 1.221                                 | 0.627                              |
| 7928189  | UNC5B       | 2.94                                 | 1.893                                 | 0.493                              |
| 7929258  | KIF11       | 1.188                                | 0.557                                 | 0.406                              |
| 7930380  | ADD3        | 0.932                                | 0.627                                 | 0.404                              |
| 7930413  | DUSP5       | 0.633                                | 0.941                                 | 1.105                              |
| 7932826  | KIAA1462    | 0.662                                | 0.447                                 | 1.146                              |
| 7933194  | CXCL12      | 2.743                                | 4.258                                 | 1.22                               |
| 7934916  | CH25H       | 1.046                                | 0.895                                 | 0.758                              |
| 7934920  | LIPA        | 0.883                                | 0.806                                 | 0.456                              |
| 7935180  | PDLIM1      | 0.959                                | 1.155                                 | 0.789                              |
| 7945767  | CDKN1C      | 0.932                                | 1.154                                 | 1.04                               |
| 7947450  | LMO2        | 1.134                                | 0.967                                 | 0.94                               |
| 7957551  | SOCS2       | 1.202                                | 1.133                                 | 0.419                              |
| 7960340  | FOXM1       | 1.008                                | 0.571                                 | 0.442                              |
| 7961514  | MGP         | 1.302                                | 1.72                                  | 0.16                               |
| 7963280  | SMAGP       | 0.742                                | 0.779                                 | 1.185                              |
| 7965090  | CSRP2       | 0.829                                | 1.003                                 | 0.692                              |
| 7970954  | DCLK1       | 0.776                                | 0.315                                 | 0.853                              |
| 7974404  | CDKN3       | 1.156                                | 0.613                                 | 0.281                              |
| 7979085  | PYGL        | 0.835                                | 1.1                                   | 0.887                              |
| 7979269  | GCH1        | 0.967                                | 0.728                                 | 0.759                              |
| 7982663  | BUB1B       | 1.069                                | 0.53                                  | 0.491                              |
| 7983969  | CCNB2       | 1.151                                | 0.606                                 | 0.306                              |
| 7985662  | PDE8A       | 1.504                                | 1.233                                 | 0.455                              |
| 7985777  | ISG20       | 1.055                                | 0.761                                 | 1.531                              |
| 7989647  | KIAA0101    | 1.017                                | 0.641                                 | 0.428                              |
| 7990391  | CYP1A1      | 0.958                                | 1.753                                 | 0.324                              |
| 7991602  | PCSK6       | 0.886                                | 0.316                                 | 1.391                              |
| 7994109  | PLK1        | 0.971                                | 0.523                                 | 0.445                              |

|         |         |       |       |       |
|---------|---------|-------|-------|-------|
| 7995907 | CETP    | 0.898 | 1.048 | 0.475 |
| 7999387 | EMP2    | 0.939 | 0.899 | 0.705 |
| 7999909 | GPRC5B  | 0.524 | 0.629 | 1.255 |
| 8002969 | MAF     | 0.875 | 0.89  | 0.398 |
| 8003903 | ARRB2   | 0.766 | 0.651 | 1.593 |
| 8007348 | RAMP2   | 1.017 | 1.374 | 0.98  |
| 8012403 | AURKB   | 0.9   | 0.443 | 0.57  |
| 8013319 | GRAP    | 2.361 | 1.154 | 0.822 |
| 8013536 | NOS2    | 0.684 | 0.57  | 0.802 |
| 8013671 | SPAG5   | 0.985 | 0.506 | 0.301 |
| 8014974 | TOP2A   | 1.02  | 0.493 | 0.369 |
| 8018849 | TK1     | 0.854 | 0.629 | 0.528 |
| 8019857 | NDC80   | 1.128 | 0.524 | 0.292 |
| 8020110 | RAB31   | 1.637 | 1.319 | 0.59  |
| 8025303 | CLEC4M  | 0.776 | 0.504 | 0.364 |
| 8032623 | TBXA2R  | 0.813 | 0.653 | 1.152 |
| 8036710 | GMFG    | 0.969 | 0.6   | 0.697 |
| 8037205 | CEACAM1 | 0.738 | 1.219 | 0.495 |
| 8042326 | CEP68   | 0.683 | 0.974 | 0.65  |
| 8043310 | RMND5A  | 1.122 | 1.115 | 0.438 |
| 8046536 | HOXD10  | 0.554 | 0.451 | 0.104 |
| 8048205 | IGFBP2  | 0.845 | 0.742 | 1.078 |
| 8048733 | ACSL3   | 1.029 | 1.246 | 0.544 |
| 8053551 | REEP1   | 1.274 | 0.846 | 0.28  |
| 8054580 | BUB1    | 0.984 | 0.517 | 0.308 |
| 8055426 | MCM6    | 0.903 | 0.632 | 0.496 |
| 8057578 | CALCRL  | 1.239 | 1.116 | 0.808 |
| 8059177 | TUBA4A  | 0.715 | 0.688 | 0.925 |
| 8060988 | BTBD3   | 1.103 | 1.308 | 0.178 |
| 8061471 | GINS1   | 0.931 | 0.481 | 0.658 |
| 8062766 | MYBL2   | 1.026 | 0.66  | 0.389 |
| 8063043 | UBE2C   | 1.067 | 0.648 | 0.636 |
| 8070567 | TFF3    | 0.964 | 0.596 | 0.608 |
| 8071276 | TBX1    | 0.612 | 1.016 | 1.116 |
| 8072626 | TIMP3   | 0.601 | 0.525 | 0.759 |
| 8077899 | PPARG   | 1.181 | 1.447 | 0.326 |
| 8078619 | ITGA9   | 1.375 | 1.505 | 0.638 |
| 8078650 | CTDSPL  | 0.712 | 0.762 | 0.439 |
| 8081657 | CD200   | 1.082 | 0.934 | 0.339 |
| 8082165 | KALRN   | 0.994 | 0.687 | 0.766 |
| 8083709 | SMC4    | 1.168 | 0.768 | 0.53  |
| 8084100 | USP13   | 1.147 | 0.659 | 0.448 |
| 8090091 | PTPLB   | 0.882 | 0.637 | 0.751 |
| 8091078 | RBP1    | 1.022 | 1.664 | 0.319 |
| 8092348 | LAMP3   | 0.853 | 0.508 | 0.404 |
| 8092959 | PPP1R2  | 1.059 | 0.995 | 0.965 |
| 8092970 | APOD    | 0.913 | 0.388 | 1.243 |
| 8097282 | SPRY1   | 0.684 | 0.365 | 0.522 |
| 8097586 | GAB1    | 0.962 | 0.635 | 0.37  |
| 8099172 | CRMP1   | 0.991 | 1.048 | 1.187 |

|         |          |       |       |       |
|---------|----------|-------|-------|-------|
| 8099524 | LDB2     | 0.904 | 1.46  | 0.712 |
| 8101237 | PAQR3    | 1.033 | 0.754 | 1.137 |
| 8102643 | CCNA2    | 1.039 | 0.535 | 0.402 |
| 8102982 | GAB1     | 0.89  | 0.853 | 0.678 |
| 8103728 | HMGB2    | 1.209 | 0.517 | 0.278 |
| 8104022 | PDLIM3   | 1.083 | 0.355 | 0.456 |
| 8105828 | CCNB1    | 1.137 | 0.54  | 0.415 |
| 8106354 | IQGAP2   | 1.011 | 2.308 | 0.226 |
| 8106923 | NR2F1    | 0.713 | 0.8   | 0.476 |
| 8107706 | LMNB1    | 0.991 | 0.408 | 0.255 |
| 8109639 | PTTG1    | 1.01  | 0.583 | 0.487 |
| 8111915 | SEPP1    | 0.952 | 0.543 | 0.322 |
| 8112107 | PPAP2A   | 1.469 | 1.775 | 0.406 |
| 8112327 | CKS1B    | 0.974 | 0.561 | 0.481 |
| 8113039 | MEF2C    | 0.897 | 0.856 | 0.441 |
| 8116445 | FLT4     | 0.806 | 0.477 | 0.893 |
| 8116780 | DSP      | 0.914 | 0.624 | 0.596 |
| 8117368 | HIST1H4C | 1.033 | 0.544 | 0.589 |
| 8118594 | HLA-DPB1 | 0.816 | 0.799 | 1.324 |
| 8118863 | ANKS1A   | 0.392 | 0.539 | 0.507 |
| 8120838 | TTK      | 1.107 | 0.469 | 0.297 |
| 8132660 | RAMP3    | 0.888 | 0.984 | 0.548 |
| 8134339 | PEG10    | 0.858 | 0.512 | 0.315 |
| 8134463 | NPTX2    | 1.074 | 1.062 | 1.12  |
| 8135436 | SLC26A4  | 0.674 | 0.609 | 0.606 |
| 8138504 | RAPGEF5  | 0.317 | 0.212 | 0.642 |
| 8141950 | RELN     | 1.15  | 0.835 | 0.306 |
| 8145005 | EPB49    | 0.995 | 0.881 | 0.732 |
| 8145122 | SLC39A14 | 0.686 | 0.471 | 1.37  |
| 8145669 | RBPM5    | 0.992 | 0.833 | 0.917 |
| 8146500 | LYN      | 1.191 | 0.985 | 0.913 |
| 8149071 | ANGPT2   | 0.658 | 0.508 | 0.515 |
| 8151447 | IL7      | 0.51  | 0.428 | 0.629 |
| 8151532 | FABP4    | 1     | 1.055 | 0.573 |
| 8151871 | CCNE2    | 0.941 | 0.596 | 0.268 |
| 8153002 | NDRG1    | 0.99  | 0.847 | 1.228 |
| 8157804 | OLFML2A  | 0.896 | 0.911 | 1.238 |
| 8161755 | ALDH1A1  | 0.95  | 1.007 | 0.127 |
| 8166925 | MAOA     | 0.809 | 1.095 | 0.352 |
| 8178220 | HLA-DPB1 | 0.721 | 0.717 | 1.234 |
| 8179519 | HLA-DPB1 | 0.803 | 0.682 | 1.362 |



**BEC-specific genes**

| Probe ID | Gene<br>Symbol | Fold Change (4hr)<br>(BMP-9/Control) | Fold Change (24hr)<br>(BMP-9/Control) | Fold Change<br>(siProx1/siControl) |
|----------|----------------|--------------------------------------|---------------------------------------|------------------------------------|
| 7896817  | ISG15          | 1.133                                | 0.93                                  | 0.69                               |
| 7896822  | AGRN           | 0.909                                | 0.854                                 | 1.655                              |
| 7897803  | PLOD1          | 0.958                                | 1.137                                 | 0.903                              |
| 7902227  | GADD45A        | 0.778                                | 0.716                                 | 1.102                              |
| 7902565  | LPHN2          | 1.301                                | 5.77                                  | 0.576                              |
| 7902594  | PRKACB         | 1.076                                | 1.006                                 | 1.038                              |
| 7905329  | MLLT11         | 1.065                                | 1.452                                 | 0.269                              |
| 7906863  | UAP1           | 1.447                                | 1.164                                 | 1.023                              |
| 7906919  | RGS4           | 0.524                                | 1.016                                 | 0.987                              |
| 7907160  | ATP1B1         | 1.142                                | 0.961                                 | 0.862                              |
| 7908072  | LAMC2          | 0.911                                | 0.909                                 | 1.404                              |
| 7908351  | PLA2G4A        | 1.867                                | 3.945                                 | 0.449                              |
| 7908917  | BTG2           | 0.651                                | 1.135                                 | 1.612                              |
| 7911038  | ZNF238         | 1.285                                | 1.08                                  | 1.665                              |
| 7912102  | KLHL21         | 1.01                                 | 1.017                                 | 1.337                              |
| 7913357  | ECE1           | 1.001                                | 1.047                                 | 0.938                              |
| 7916584  | TACSTD2        | 0.751                                | 0.621                                 | 0.752                              |
| 7916609  | JUN            | 0.699                                | 1.49                                  | 2.1                                |
| 7917532  | GBP2           | 1.121                                | 1.848                                 | 1.274                              |
| 7922200  | SELP           | 0.829                                | 1.102                                 | 0.993                              |
| 7922229  | SELE           | 5.727                                | 1.321                                 | 0.564                              |
| 7927631  | DKK1           | 1.23                                 | 0.807                                 | 1.705                              |
| 7927964  | SRGN           | 0.981                                | 1.571                                 | 1.156                              |
| 7928429  | PLAU           | 0.962                                | 0.709                                 | 4.343                              |
| 7932227  | NMT2           | 0.872                                | 1.282                                 | 0.56                               |
| 7933469  | ARHGAP22       | 0.956                                | 0.962                                 | 1.768                              |
| 7934906  | ACTA2          | 0.849                                | 0.798                                 | 1.545                              |
| 7936673  | RGS10          | 1.061                                | 1.184                                 | 2.13                               |
| 7938035  | TRIM22         | 0.904                                | 0.788                                 | 1.136                              |
| 7939120  | RCN1           | 0.946                                | 0.871                                 | 1.148                              |
| 7939341  | CD44           | 1.053                                | 3.018                                 | 1.382                              |
| 7940717  | SLC3A2         | 1.066                                | 1.435                                 | 1.445                              |
| 7943998  | NNMT           | 0.905                                | 0.795                                 | 1.025                              |
| 7944082  | TAGLN          | 0.914                                | 0.845                                 | 1.053                              |
| 7947425  | CD59           | 0.887                                | 0.762                                 | 1.092                              |
| 7947599  | CHST1          | 1.178                                | 1.006                                 | 1.374                              |
| 7948332  | LPXN           | 0.911                                | 1.093                                 | 1.602                              |
| 7950906  | CTSC           | 0.851                                | 0.505                                 | 0.929                              |
| 7951271  | MMP1           | 0.913                                | 0.243                                 | 3.318                              |
| 7953532  | ENO2           | 0.949                                | 0.871                                 | 1.018                              |
| 7955078  | PFKM           | 0.957                                | 1.131                                 | 1.201                              |
| 7955613  | KRT7           | 1.109                                | 1.294                                 | 1.686                              |
| 7958784  | ALDH2          | 0.962                                | 1.259                                 | 0.719                              |
| 7961532  | ARHGDIB        | 1.122                                | 0.941                                 | 1.931                              |



|         |          |       |       |       |
|---------|----------|-------|-------|-------|
| 7961546 | EPS8     | 0.898 | 1.372 | 0.428 |
| 7961693 | LDHB     | 0.92  | 0.891 | 0.742 |
| 7963786 | ITGA5    | 1.041 | 1.126 | 0.522 |
| 7964360 | STAT6    | 0.97  | 1.034 | 1.222 |
| 7966026 | NUAK1    | 1.557 | 1.875 | 1.487 |
| 7970763 | FLT1     | 1.461 | 2.251 | 0.818 |
| 7973336 | MMP14    | 0.887 | 0.914 | 1.238 |
| 7974816 | SLC38A6  | 1.019 | 1.371 | 1.301 |
| 7975760 | EIF2B2   | 0.728 | 0.739 | 1.777 |
| 7976443 | IFI27    | 1.071 | 0.936 | 2.52  |
| 7977299 | KIAA0284 | 0.979 | 0.971 | 1.497 |
| 7977615 | RNASE1   | 0.951 | 2.364 | 3.25  |
| 7977786 | SLC7A7   | 0.72  | 1.584 | 0.723 |
| 7980152 | LTBP2    | 1.291 | 1.103 | 0.866 |
| 7980233 | PGF      | 0.82  | 0.707 | 3.633 |
| 7981514 | AHNAK2   | 0.881 | 0.868 | 1.418 |
| 7983393 | SORD     | 0.798 | 0.537 | 1.175 |
| 7984079 | TPM1     | 1.243 | 1.159 | 1.204 |
| 7984364 | SMAD3    | 0.781 | 1.005 | 1.37  |
| 7984517 | GLCE     | 0.824 | 1.55  | 0.86  |
| 7986329 | NR2F2    | 1.365 | 1.558 | 0.751 |
| 7991335 | ANPEP    | 0.928 | 0.697 | 0.784 |
| 7992828 | IL32     | 0.882 | 0.58  | 1.568 |
| 7994280 | IL4R     | 1.091 | 0.844 | 1.506 |
| 7994659 | MVP      | 0.895 | 0.921 | 1.227 |
| 7995292 | SLC6A8   | 1.866 | 1.42  | 1.529 |
| 7995776 | MT3      | 1.067 | 1.038 | 1.45  |
| 7995797 | MT1E     | 0.921 | 0.341 | 0.578 |
| 7995806 | MT1A     | 1.007 | 0.556 | 0.719 |
| 7995820 | MT1B     | 0.859 | 1.158 | 1.337 |
| 7995825 | MT1F     | 0.991 | 0.62  | 0.818 |
| 7995829 | MT1H     | 0.83  | 1.218 | 1.001 |
| 7995838 | MT1X     | 1.029 | 0.662 | 0.598 |
| 8001082 | SLC6A8   | 1.823 | 1.387 | 1.522 |
| 8006433 | CCL2     | 0.573 | 0.133 | 1.372 |
| 8012126 | CLDN7    | 0.987 | 1.095 | 1.067 |
| 8017547 | ICAM2    | 0.617 | 0.422 | 1.484 |
| 8017651 | SMURF2   | 1.668 | 1.929 | 1.163 |
| 8019061 | SGSH     | 0.899 | 1.084 | 1.544 |
| 8019074 | NPTX1    | 1.213 | 1.243 | 1.479 |
| 8022674 | CDH2     | 1.31  | 1.021 | 0.911 |
| 8025601 | ICAM1    | 0.56  | 0.289 | 1.894 |
| 8029006 | AXL      | 0.767 | 0.854 | 0.967 |
| 8030007 | EMP3     | 1.082 | 1.018 | 1.271 |
| 8034608 | LYL1     | 1.088 | 1.176 | 1.332 |
| 8038407 | RRAS     | 0.882 | 0.994 | 1.261 |
| 8039166 | MBOAT7   | 0.998 | 1.342 | 1.481 |
| 8040473 | RHOB     | 1.54  | 1.368 | 0.922 |
| 8045933 | TANK     | 0.905 | 0.847 | 1.166 |
| 8046861 | ITGAV    | 1.391 | 1.549 | 0.627 |

|         |          |       |       |       |
|---------|----------|-------|-------|-------|
| 8050702 | TP53I3   | 0.893 | 0.901 | 1.549 |
| 8051573 | CDC42EP3 | 0.371 | 0.983 | 3.306 |
| 8052355 | EFEMP1   | 1.005 | 0.925 | 0.47  |
| 8053417 | CAPG     | 0.948 | 0.891 | 1.013 |
| 8054377 | FHL2     | 0.717 | 0.803 | 1.325 |
| 8055465 | CXCR4    | 0.683 | 0.357 | 0.324 |
| 8056113 | LY75     | 0.925 | 0.588 | 0.839 |
| 8056257 | FAP      | 1.213 | 0.993 | 1.223 |
| 8059854 | ARL4C    | 0.688 | 0.821 | 1.352 |
| 8060758 | PRNP     | 0.917 | 0.946 | 0.931 |
| 8062108 | PROCR    | 0.916 | 1.523 | 1.178 |
| 8066214 | TGM2     | 0.83  | 0.769 | 0.685 |
| 8066619 | PLTP     | 0.817 | 0.987 | 3.558 |
| 8067409 | LAMA5    | 0.885 | 0.769 | 1.739 |
| 8069269 | COL6A1   | 1.011 | 1.082 | 1.475 |
| 8072360 | TCN2     | 0.905 | 2.071 | 2.289 |
| 8072678 | HMOX1    | 0.777 | 0.499 | 8.035 |
| 8074498 | TXNRD2   | 0.832 | 0.856 | 0.954 |
| 8075910 | RAC2     | 0.843 | 1.032 | 1.811 |
| 8078461 | FBXL2    | 0.965 | 1.334 | 1.591 |
| 8079407 | CCRL2    | 0.751 | 1.351 | 1.985 |
| 8080013 | MAPKAPK3 | 0.929 | 1.02  | 2.332 |
| 8080320 | NISCH    | 1.188 | 1.664 | 1.136 |
| 8080926 | ARL6IP5  | 0.949 | 1.243 | 1.014 |
| 8081235 | COL8A1   | 0.794 | 1.781 | 1.433 |
| 8083318 | PFN2     | 0.937 | 0.992 | 1.305 |
| 8088415 | FAM107A  | 0.933 | 1.058 | 1.519 |
| 8090162 | ITGB5    | 0.88  | 0.576 | 0.632 |
| 8091283 | PLOD2    | 0.872 | 0.807 | 0.502 |
| 8091446 | PFN2     | 1.031 | 0.934 | 1.219 |
| 8091972 | MECOM    | 1.505 | 4.306 | 0.575 |
| 8093304 | CCRL2    | 0.738 | 1.259 | 2.114 |
| 8094778 | UCHL1    | 0.887 | 0.821 | 0.592 |
| 8095680 | IL8      | 1.15  | 1.191 | 1.219 |
| 8095697 | CXCL1    | 0.932 | 0.735 | 1.703 |
| 8095986 | ANXA3    | 0.829 | 0.441 | 2.435 |
| 8099982 | APBB2    | 0.902 | 0.628 | 1.138 |
| 8103822 | VEGFC    | 2.593 | 2.597 | 0.889 |
| 8104601 | BASP1    | 1.151 | 0.993 | 1.398 |
| 8106743 | VCAN     | 0.895 | 0.984 | 1.345 |
| 8107897 | PDLIM4   | 1.066 | 1.395 | 1.493 |
| 8108217 | TGFBI    | 1.5   | 1.652 | 0.688 |
| 8109528 | CYFIP2   | 0.821 | 0.537 | 1.854 |
| 8114767 | PCDH1    | 1.446 | 1.619 | 1.571 |
| 8115234 | ANXA6    | 0.801 | 0.756 | 1.314 |
| 8116818 | BMP6     | 1.222 | 1.932 | 0.569 |
| 8117054 | CAP2     | 0.902 | 1.075 | 1.766 |
| 8119088 | CDKN1A   | 1.043 | 0.819 | 1.871 |
| 8122365 | GPR126   | 0.883 | 1.352 | 1.144 |
| 8124848 | IER3     | 0.469 | 0.746 | 1.727 |

|         |          |       |       |       |
|---------|----------|-------|-------|-------|
| 8126839 | TNFRSF21 | 0.917 | 0.874 | 0.71  |
| 8127051 | TRAM2    | 0.68  | 0.655 | 1.311 |
| 8131803 | IL6      | 0.745 | 1.105 | 3.024 |
| 8132725 | UPP1     | 1.04  | 0.781 | 1.303 |
| 8134263 | COL1A2   | 0.912 | 0.927 | 0.814 |
| 8135069 | SERPINE1 | 1.409 | 0.689 | 1.158 |
| 8138566 | IGF2BP3  | 0.942 | 0.977 | 0.786 |
| 8138602 | DFNA5    | 0.955 | 2.206 | 1.524 |
| 8142270 | NRCAM    | 1     | 3.156 | 0.942 |
| 8142452 | TFEC     | 0.857 | 0.797 | 2.56  |
| 8147012 | PKIA     | 0.987 | 0.776 | 1.185 |
| 8149774 | LOXL2    | 0.892 | 0.547 | 1.414 |
| 8149927 | CLU      | 0.797 | 0.81  | 0.644 |
| 8152491 | EXT1     | 1.23  | 0.94  | 0.633 |
| 8154135 | SLC1A1   | 0.563 | 1.066 | 1.158 |
| 8161044 | TPM2     | 0.938 | 1.06  | 1.442 |
| 8168749 | SRPX2    | 0.992 | 1.508 | 1.054 |
| 8170648 | BGN      | 1.229 | 2.033 | 1.221 |
| 8170662 | SLC6A8   | 1.132 | 1.317 | 1.347 |
| 8172043 | SRPX     | 0.906 | 1.45  | 0.441 |
| 8173755 | ITM2A    | 0.952 | 1.923 | 0.61  |
| 8174779 | LAMP2    | 0.995 | 1.07  | 0.583 |
| 8178435 | IER3     | 0.468 | 0.683 | 1.648 |
| 8179704 | IER3     | 0.469 | 0.746 | 1.727 |

**Table S7. List of primers used for RT-PCR analysis**

Primers for semi-quantitative RT-PCR

| species | Transcript        | Primer Sequence (5' to 3') |                            |
|---------|-------------------|----------------------------|----------------------------|
| human   | $\beta$ -actin    | 5'                         | TCACCCACACTGTGCCCATCTACGA  |
|         |                   | 3'                         | CAGCGGAACCGCTCATTGCCAATGG  |
| human   | ALK-1             | 5'                         | CTCTACGACTTTCTGCAGAG       |
|         |                   | 3'                         | CCACTTGTAGGACTCAAAGC       |
| human   | ALK-2             | 5'                         | ATGTCTTTTAGCCTGCCTGCTG     |
|         |                   | 3'                         | ATCAAGCTGATTGGTGCTCTGG     |
| human   | ALK-3             | 5'                         | TGATTTGGAACAGGATGAAGC      |
|         |                   | 3'                         | TGTAGCACATTTTCAGGAAGTC     |
| human   | ALK-4             | 5'                         | TCCAAAGACAAGACGCTCC        |
|         |                   | 3'                         | ATCATCTTCCCCATCACCC        |
| human   | ALK-5             | 5'                         | TCGCCCTTTTATTTTCAGAGGGTACT |
|         |                   | 3'                         | ACAGCAAGTTCCATTCTTCTTTACC  |
| human   | ALK-6             | 5'                         | GCAGCACAGACGGATATTGT       |
|         |                   | 3'                         | TTTCATGCCTCATCAACT         |
| human   | TGF- $\beta$ R-II | 5'                         | ATAAGGCCAAGCTGAAGCAG       |
|         |                   | 3'                         | CTTCTGGAGCCATGTATCTTG      |
| human   | BMPR-II           | 5'                         | CTGCACAGTGTGCTGAGGAAAG     |
|         |                   | 3'                         | TGAACTGCCCTGTTACTGCCA      |
| human   | ActR-II           | 5'                         | GCAAAATGAATACGAAGTCTA      |
|         |                   | 3'                         | GCACCCTCTAATACCTCTGGA      |
| human   | ActR-IIB          | 5'                         | ACACGGGAGTGCATCTACTACAACG  |
|         |                   | 3'                         | TCATGAGCTGGGCCTTCCAGA      |
| human   | endoglin          | 5'                         | AAGTTTGTCTTGCGCAGTGCTT     |
|         |                   | 3'                         | GCGTGTGCGAGTAGATGTACCA     |
| human   | betaglycan        | 5'                         | CAAAGGACCCTGTCATTCCCA      |
|         |                   | 3'                         | CATCATGGCCCAGATTATCGA      |
| human   | Smad1             | 5'                         | TGCCACTCAACGCCACTTTT       |
|         |                   | 3'                         | TCATAAGCAACCGCCTGAACAT     |
| human   | Smad2             | 5'                         | CCCATCGAAAAGGATTGCCACA     |
|         |                   | 3'                         | TGCATGGAAGGTTTCTCCAACC     |
| human   | Smad3             | 5'                         | GGACGACTACAGCCATTCCA       |
|         |                   | 3'                         | TTCCGATGTGTCTCCGTGTCA      |
| human   | Smad4             | 5'                         | CTTTGAAATGGATGGATGTTTCAG   |
|         |                   | 3'                         | CATCCTGATAAGGTTAAGGG       |
| human   | Smad5             | 5'                         | ACGTCAATGGCCAGCTTGTT       |
|         |                   | 3'                         | TCCAACGGCTTTAGCTCATGA      |
| human   | Smad8             | 5'                         | ATCTTTGTGCAGAGCCGGAA       |
|         |                   | 3'                         | TCCTGGCGATGATACTCAGCA      |
| human   | Prox1             | 5'                         | CCCAGGACAGTTTATTGACCGA     |
|         |                   | 3'                         | GGTTGTAAGGAGTTTGGCCCAT     |
| human   | PECAM-1           | 5'                         | GGAAAAGGCCCAATACACTT       |
|         |                   | 3'                         | TAAAACGCGGTCCTGTTCTC       |

Primers for quantitative RT-PCR

| species | Transcript     | Primer | Sequence (5' to 3')       |
|---------|----------------|--------|---------------------------|
| human   | ALK-1          | 5'     | ATGTGCTGGTCAAGAGCAACCT    |
|         |                | 3'     | ACGATGCCATTACGATGGT       |
| human   | ALK-2          | 5'     | GCGGATGGTGAGCAATGGTATA    |
|         |                | 3'     | GGCCTTTGTTGATCCACACAGA    |
| human   | ALK-5          | 5'     | TGGAGAGGAAAGTGGCGGGGAG    |
|         |                | 3'     | GCCTCACGGAACCACGAACG      |
| human   | PAI-1          | 5'     | AATCAGACGGCAGCACTGTCT     |
|         |                | 3'     | GGCAGTTCAGGATGTCGTAGT     |
| human   | Id1            | 5'     | AGCACGTCATCGACTACATCAGG   |
|         |                | 3'     | GGATTCCGAGTTCAGCTCCA      |
| human   | Smad7          | 5'     | TGCAACCCCATCACCTTAG       |
|         |                | 3'     | GACAGTCTGCAGTTGGTTTGAGA   |
| human   | Prox1          | 5'     | CCCAGGACAGTTTATTGACCGA    |
|         |                | 3'     | GGTTGTAAGGAGTTTGGCCCAT    |
| human   | ABCG2          | 5'     | AGATGGGTTTCCAAGCGTTCAT    |
|         |                | 3'     | CCAGTCCCAGTACGACTGTGACA   |
| human   | β-actin        | 5'     | TCACCCACACTGTGCCCATCTACGA |
|         |                | 3'     | CAGCGGAACCGCTCATTGCCAATGG |
| human   | cyclin E2      | 5'     | CCCAGATAATCCAGGCCAAGA     |
|         |                | 3'     | CCCAGATAATACAGGTGGCCAA    |
| human   | VEGFR3         | 5'     | AGTACATCAAGGCACGCATCGA    |
|         |                | 3'     | ACCAAGAGCGTGTCAGGCTTGT    |
| human   | LYVE-1         | 5'     | AGCCTGGTGTTGCTTCTCACT     |
|         |                | 3'     | GGTTCGCCTTTTGCTCACA       |
| human   | podoplanin     | 5'     | GTGACTCTAAGCTTGCTCCC      |
|         |                | 3'     | TCCAGAACAAGCAGCCAAT       |
| human   | neuropilin-2   | 5'     | TGCGGAGGTCGTTTGAATTC      |
|         |                | 3'     | ACCGGGAGAGGTGATATAGCC     |
| human   | angiopoietin-2 | 5'     | TCTTGTCTTGGCCGCAGCCT      |
|         |                | 3'     | TCGTATTCGAGCGGCGCGTC      |
| human   | VEGFR2         | 5'     | CAGAATCCCTGCGAAGTACCTT    |
|         |                | 3'     | GTCAGTACATGCCCCGCTTTAA    |
| human   | endoglin       | 5'     | AAGTTTGTCTTGCGCAGTGCTT    |
|         |                | 3'     | ACTTTTTCCGCTGTGGTGAT      |
| human   | neuropilin-1   | 5'     | TCATCGGGCATTCTCTCCAT      |
|         |                | 3'     | TCTTCTGAGACACTGCTCTGCAA   |
| human   | TIE-2          | 5'     | GGTGGAAAAGCCCTTCAACA      |
|         |                | 3'     | CATCCCCAAAGTAAGGCTCAG     |
| human   | GAPDH          | 5'     | GAAGGTGAAGGTCGGAGTC       |
|         |                | 3'     | GAAGATGGTGATGGGATTTT      |
| human   | VE-cadherin    | 5'     | TAGCATTGGATACTCCATCCGC    |
|         |                | 3'     | TTTGGCCTCCACAGTCAGGTTA    |
